# Supplementary material for: Chemical interdiffusion between Na-series tephritic and phonolitic melts with different H2O content, temperature, and oxygen fugacity values
Source: Copernicus journal article supplement (doi:10.5194/ejm-36-623-2024), 2024-08-23
Supplement: Supplementary file 1 [file ejm-36-623-2024-supplement.zip]

# Chemical interdiffusion between Na-tephritic and phonolitic melts with different H<sub>2</sub>O content, temperature, and oxygen fugacity

Diego González-García, Florian Pohl, Felix Marxer, Stepan Krasheninnikov, Renat Almeev & François Holtz

## SUPPLEMENTARY FIGURES AND TABLES

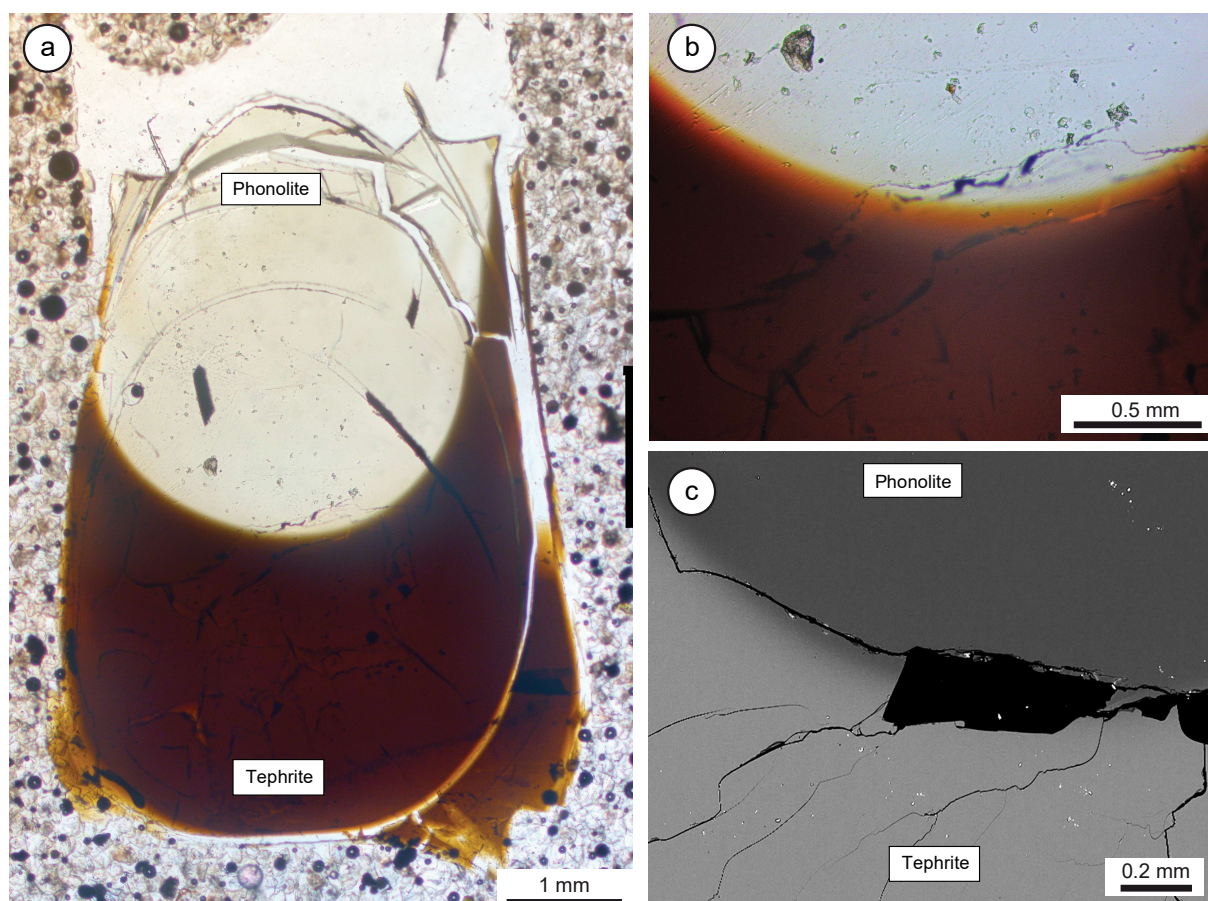

**Figure S1.** Zero-time experiment (DCB-01; 1200 °C, 0.3 wt% H<sub>2</sub>O), run to check for dissolution quench crystals in the tephritic melt during experiment heat-up. (a) Transmitted light whole-experiment mosaic; (b) detail of the interface in transmitted light and (c) back-scattered electron (BSE) image from the electron microprobe.

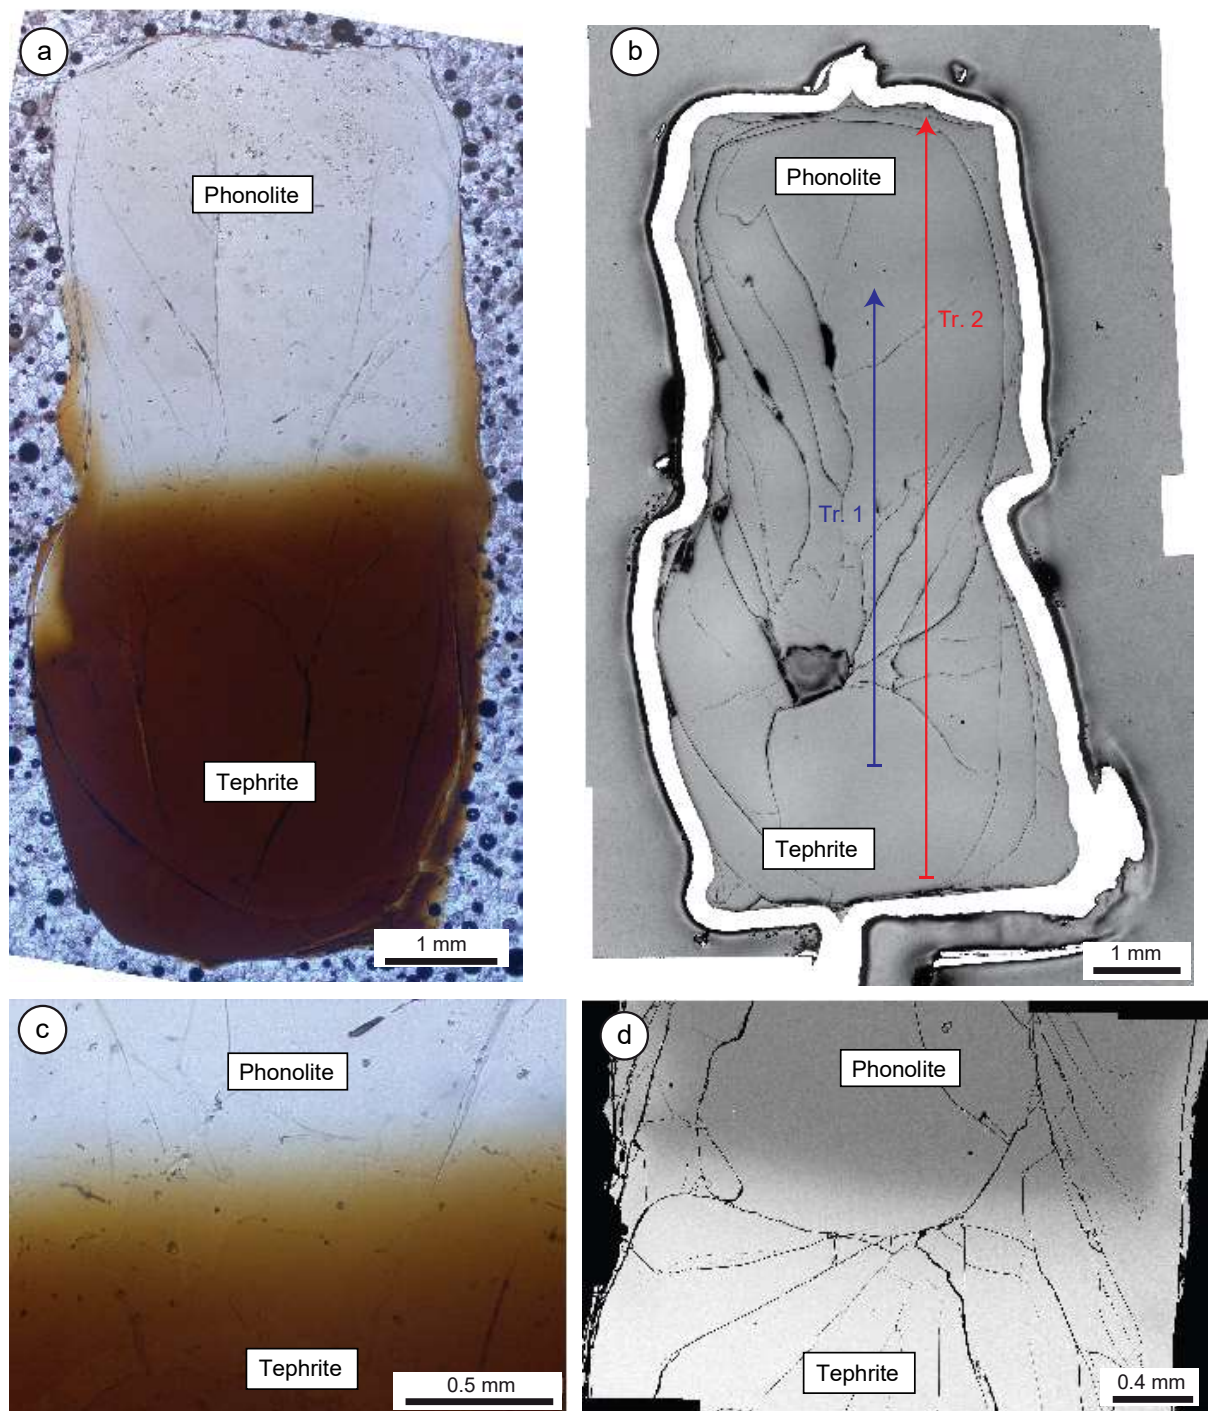

**Figure S2.** Example of a diffusion couple experiment. (a) Whole-run transmitted light mosaic from a double polished section (experiment DC-05); (b) reflected light mosaic of the same experiment mounted in epoxy, showing the approximate position of the short (Tr. 1) and long (Tr. 2) transects measured by the EPMA; (c) detail of the interface of the same experiment in transmitted light; and (d) BSE mosaic of the interface region of experiment DCB-02.

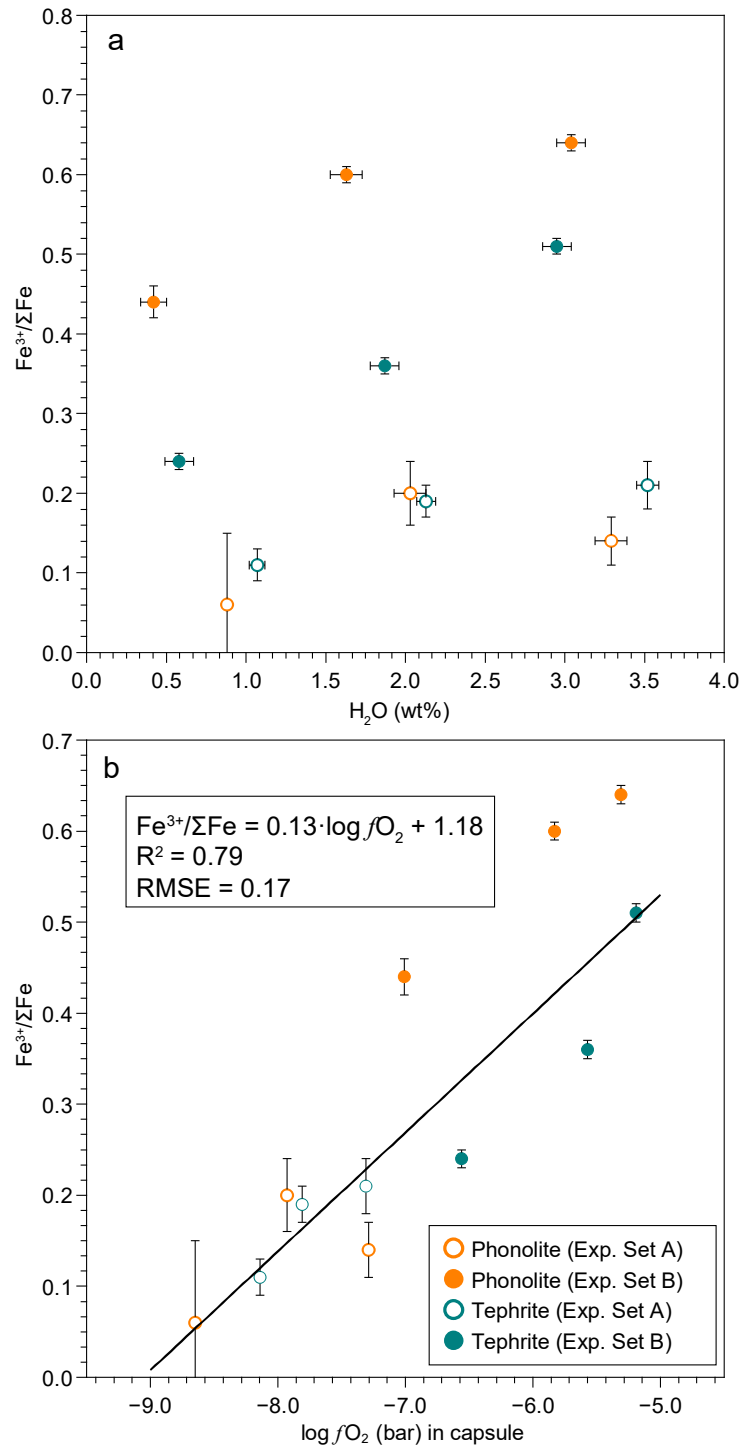

**Figure S3.** (a) Oxidation state of iron expressed as  $\text{Fe}^{3+}/\Sigma\text{Fe}$  as a function of  $\text{H}_2\text{O}$  contents in synthesis runs, measured by wet chemistry (Schuessler et al. 2008) and Karl-Fischer Titration. Most data points are the average of two measurements. (b) Fe oxidation state as a function of estimated  $\log f\text{O}_2$  in capsule (see text for details), fitted by a linear function.

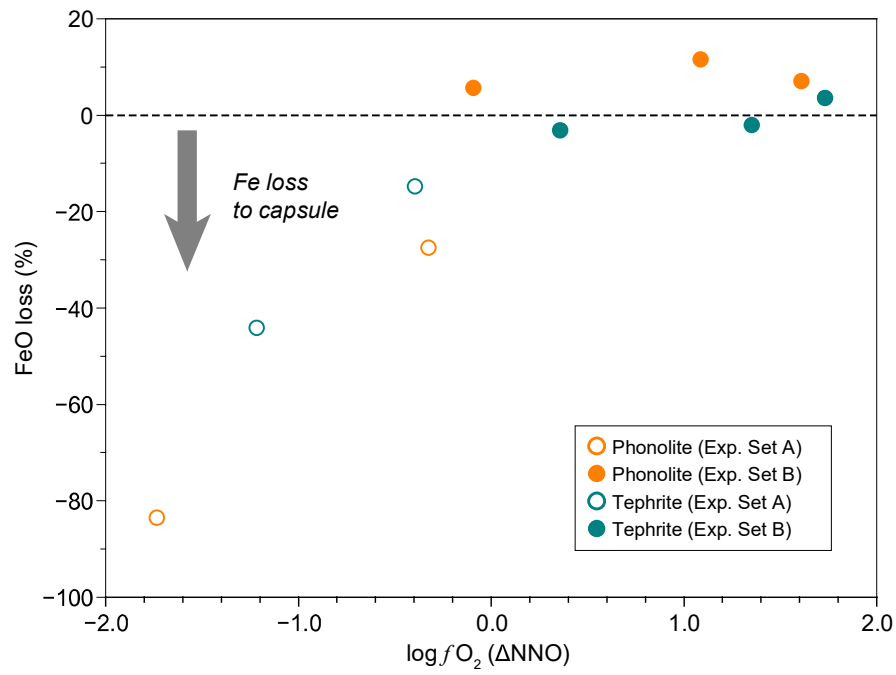

**Figure S4.** Fe loss to capsule walls (in % relative to starting value) in synthesis experiments as a function of estimated  $fO_2$ . As chemical compositions were not measured in hydrous starting glasses, FeO values were obtained from the ends of the concentration-distance profiles of the corresponding diffusion couple experiments.

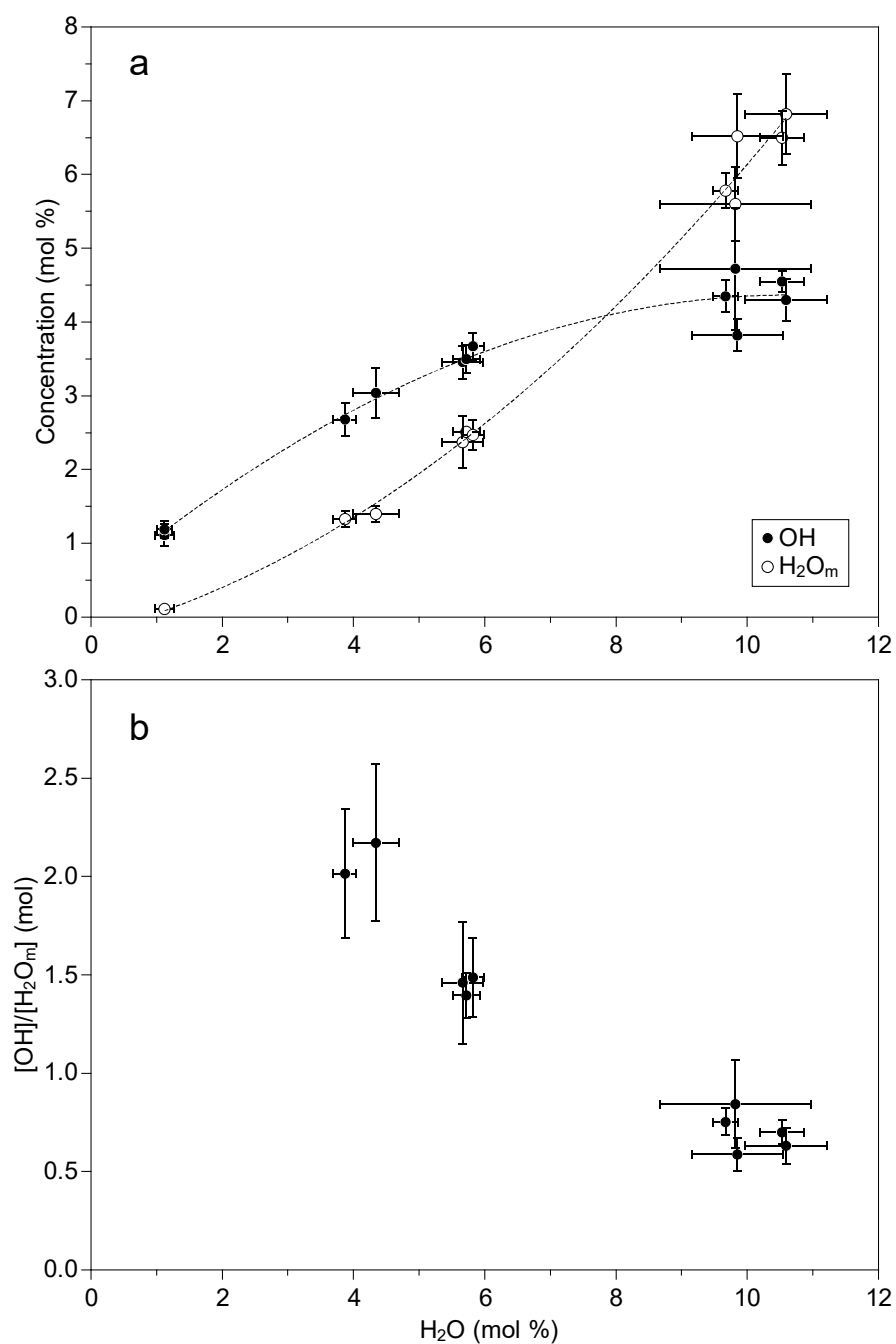

**Figure S5.** Estimated H<sub>2</sub>O speciation in for the TP55 glass. (a) OH and H<sub>2</sub>O<sub>m</sub> (molecular water) as determined by FTIR in the diffusion couple experiments. (b) [OH]/[H<sub>2</sub>O<sub>m</sub>] ratio, excluding the 0.3 wt.% experiments, which yielded very high ratio errors due to low H<sub>2</sub>O<sub>m</sub> values.

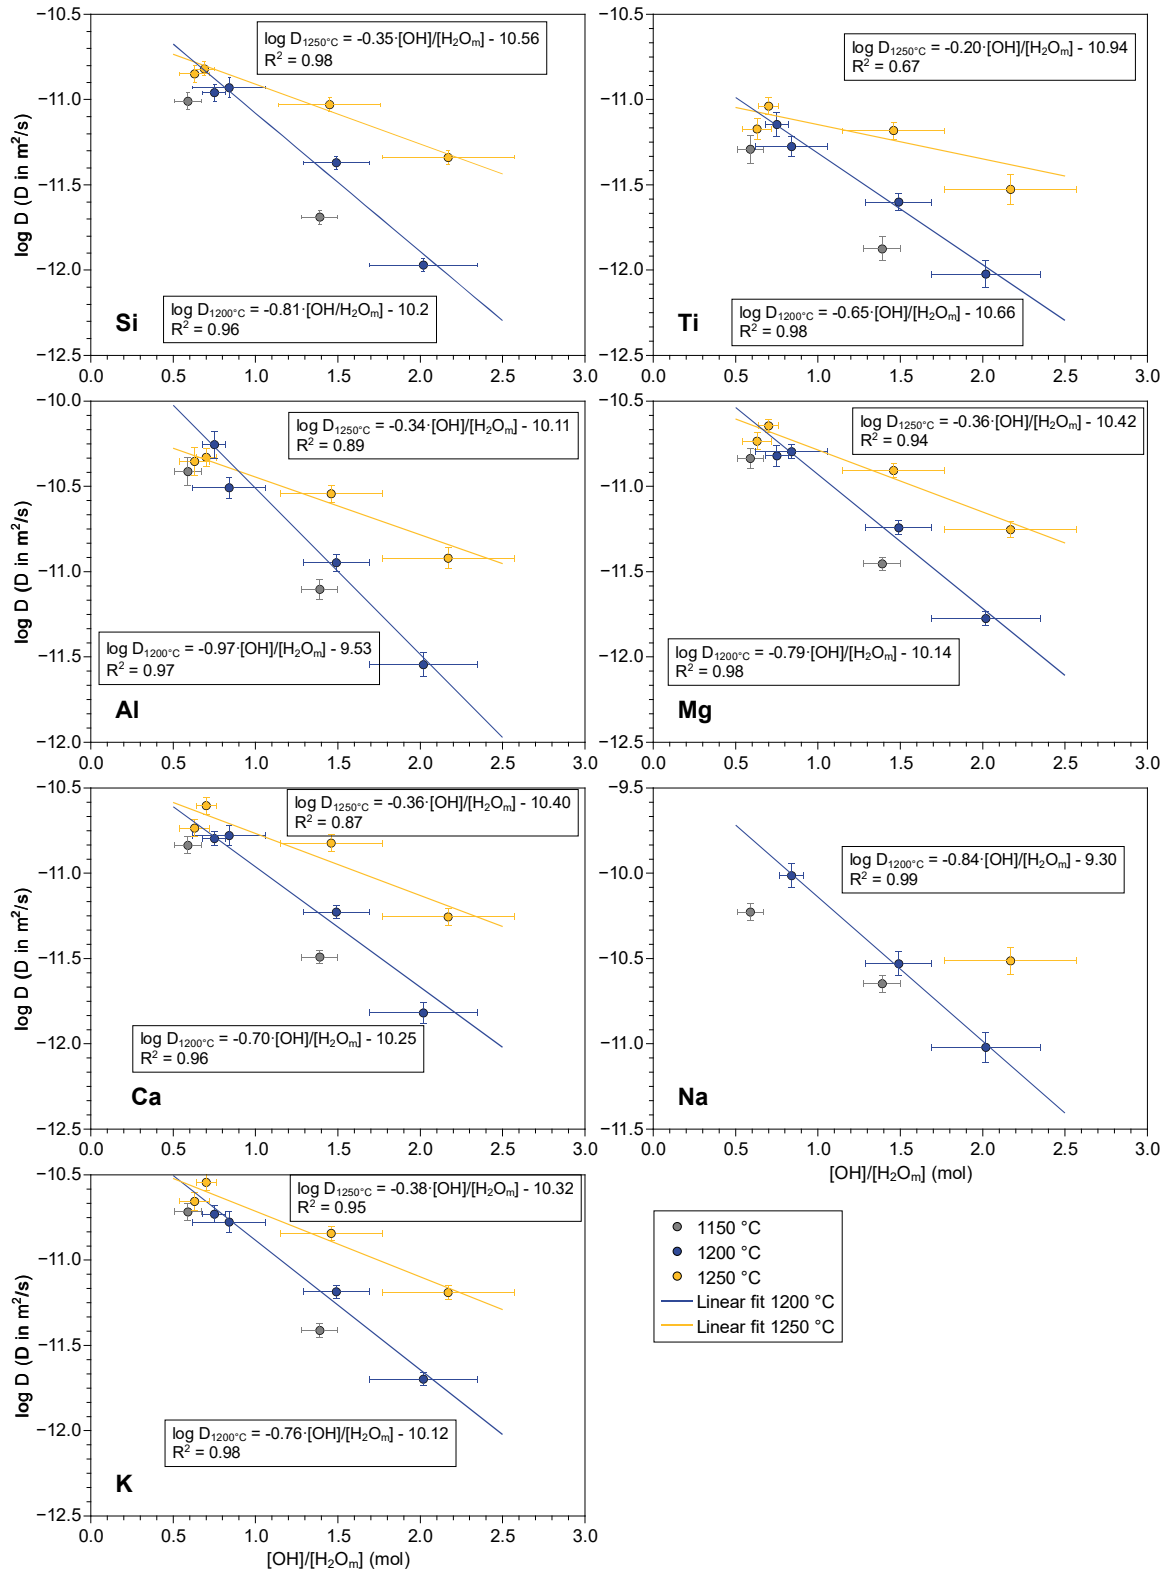

**Figure S6.** Relation between diffusion coefficients and the  $[\text{OH}]/[\text{H}_2\text{O}_m]$  ratio, showing linear relationships for all major elements. Data at 0.3 wt.%  $\text{H}_2\text{O}$  was excluded due to the very high errors in the  $[\text{OH}]/[\text{H}_2\text{O}_m]$  ratio.



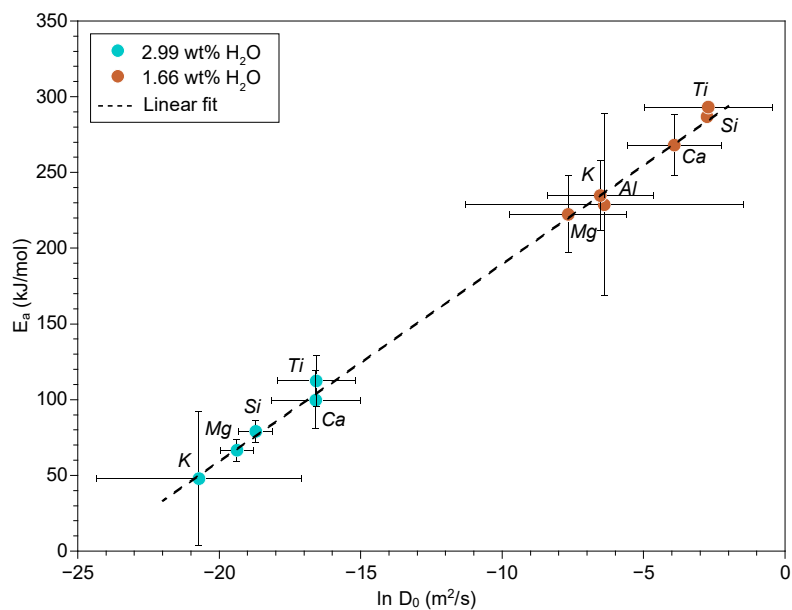

**Figure S7.** Plot of Arrhenius parameters  $\ln D_0$  vs activation energy ( $E_a$ ), showing that major elements plot (law of diffusion compensation) along the same linear fit for different  $\text{H}_2\text{O}$  contents.

**Table S1.** Synthesis run conditions.

| Run #            | Sample    | Type      | T (°C) | P (Mpa) | Target $f\text{O}_2$ | $\text{H}_2\text{O}$ KFT (wt%) | $\text{H}_2\text{O}$ FTIR (wt%) | $\text{XH}_2\text{O}^a$ | $\text{Fe}^{2+}/\Sigma\text{Fe}^b$ | $\log f\text{O}_2$ capsule (bar) <sup>c</sup> | $\log f\text{O}_2$ capsule ( $\Delta\text{NNO}$ ) |
|------------------|-----------|-----------|--------|---------|----------------------|--------------------------------|---------------------------------|-------------------------|------------------------------------|-----------------------------------------------|---------------------------------------------------|
| Experiment Set A |           |           |        |         |                      |                                |                                 |                         |                                    |                                               |                                                   |
| 1                | ABP-F-ND  | Phonolite | 1250   | 300     | NNO                  |                                | $0.88 \pm 0.02$                 | 0,14                    | $0.94 \pm 0.09$                    | -8,65                                         | -1.73                                             |
| 10               | ABP-F-1.5 | Phonolite | 1250   | 300     | NNO                  | $2.07 \pm 0.10$                | $1.99 \pm 0.02$                 | 0,30                    | $0.80 \pm 0.04$                    | -7,93                                         | -1.01                                             |
| 4                | ABP-F-3   | Phonolite | 1250   | 300     | NNO                  | $3.34 \pm 0.10$                | $3.24 \pm 0.03$                 | 0,48                    | $0.86 \pm 0.03$                    | -7,29                                         | -0.33                                             |
| 15               | PF21-ND   | Tephrite  | 1250   | 300     | NNO                  | $1.07 \pm 0.05$                |                                 | 0,10                    | $0.89 \pm 0.02$                    | -8,14                                         | -1.22                                             |
| 6                | PF21-1.5  | Tephrite  | 1250   | 300     | NNO                  | $2.13 \pm 0.06$                |                                 | 0,40                    | $0.81 \pm 0.02$                    | -7,81                                         | -0.90                                             |
| 13               | PF21-3    | Tephrite  | 1250   | 300     | NNO                  | $3.52 \pm 0.07$                |                                 | 0,51                    | $0.79 \pm 0.02$                    | -7,31                                         | -0.40                                             |
| Experiment Set B |           |           |        |         |                      |                                |                                 |                         |                                    |                                               |                                                   |
| 18               | ABP-F-ND  | Phonolite | 1250   | 300     | NNO+2,3              | $0.5 \pm 0.08$                 | $0.33 \pm 0.02$                 | 0,06                    | $0.56 \pm 0.02$                    | -7,01                                         | -0.09                                             |
| 19               | ABP-F-1.5 | Phonolite | 1250   | 300     | NNO+2,3              | $1.7 \pm 0.10$                 | $1.56 \pm 0.02$                 | 0,25                    | $0.40 \pm 0.01$                    | -5,83                                         | +1.09                                             |
| 20               | ABP-F-3   | Phonolite | 1250   | 300     | NNO+2,3              | $3.13 \pm 0.09$                | $2.94 \pm 0.03$                 | 0,45                    | $0.36 \pm 0.01$                    | -5,31                                         | +1.61                                             |
| 21               | PF21-ND   | Tephrite  | 1250   | 300     | NNO+2,3              | $0.58 \pm 0.09$                |                                 | 0,11                    | $0.76 \pm 0.01$                    | -6,56                                         | +0.34                                             |
| 17               | PF21-1.5  | Tephrite  | 1250   | 300     | NNO+2,3              | $1.87 \pm 0.09$                |                                 | 0,34                    | $0.64 \pm 0.01$                    | -5,57                                         | +1.35                                             |
| 27               | PF21-3    | Tephrite  | 1250   | 300     | NNO+2,3              | $2.95 \pm 0.06$                |                                 | 0,52                    | $0.49 \pm 0.01$                    | -5,19                                         | +1.73                                             |

<sup>a</sup>  $\text{XH}_2\text{O}$  calculated as  $\text{H}_2\text{O}(\text{experiment})/\text{H}_2\text{O}(\text{saturation})$  in mol%, with  $\text{H}_2\text{O}(\text{saturation})$  calculated using the MagmaSat model (Ghiorso and Gualda, 2015)

<sup>b</sup> Fe speciation was obtained by a wet-chemical method (Schuessler et al., 2008). Each value is the average of two measurements.

<sup>c</sup>  $f\text{O}_2$  value inside the capsule was calculated from  $\text{XH}_2\text{O}$  by adding the term  $2 \cdot \log(\text{XH}_2\text{O})$  to the intrinsic  $f\text{O}_2$  value (see text).
