# Supplementary material for: Chemical interdiffusion between Na-series tephritic and phonolitic melts with different H2O content, temperature, and oxygen fugacity values
Source: Copernicus journal article supplement (doi:10.5194/ejm-36-623-2024), 2024-08-23
Supplement: Supplementary file 1 [file ejm-36-623-2024-supplement.zip]

## Sheet: Run summary
	Experimental run conditions
	Run	Date	Nominal time (h)	Effective duration (s)	T (ªC)	P (MPa)	H2O (wt.%)	Target fO2	no. of transects
	DC-03	2021-10-22	4	14636	1250	300	1.24 ± 0.10	NNO	2
	DC-04	2021-10-22	4	14726	1200	300	1.10 ± 0.05	NNO	2
	DC-05	2021-12-16	2	7445	1150	300	2.99 ± 0.21	NNO	2
	DC-06	2021-11-13	2	7680	1200	300	2.98 ± 0.35	NNO	1
	DC-07	2021-11-14	2	7200	1250	300	3.24 ± 0.19	NNO	2
	DCB-01	2021-10-25	0	789	1250	300	-	Intrinsic	1
	DCB-02	2021-10-07	4	14899	1250	300	0.31 ± 0.04	Intrinsic	2
	DCB-04	2021-11-26	4	14933	1300	300	0.31 ± 0.03	Intrinsic	2
	DCB-07	2022-01-14	4	14605	1250	300	1.64 ± 0.09	Intrinsic	2
	DCB-09	2022-01-18	4	14720	1150	300	1.66 ± 0.06	Intrinsic	2
	DCB-10	2022-01-19	2	7434	1250	300	3.22 ± 0.10	Intrinsic	1
	DCB-11	2022-01-20	2	7200	1200	300	2.93 ± 0.06	Intrinsic	2
	DCB-12	2022-02-09	4	14684	1200	300	1.69 ± 0.05	Intrinsic	2

## Sheet: Standards
Glass standards
Comment	Oxides (wt.%)
	SiO2	TiO2	Al2O3	FeO	MnO	MgO	CaO	Na2O	K2O	P2O5	Total
VG-2
VG-2 #01	51.61	1.91	13.25	11.64	0.2164	6.75	11.06	2.6	0.1816	0.2319	99.4499
VG-2 #02	51.16	1.8	13.23	11.79	0.2142	6.96	11.05	2.7	0.1817	0.1916	99.2775
VG-2 #03	51.47	1.84	13.39	11.67	0.1677	6.97	11.01	2.61	0.1818	0.1648	99.4743
VG-2 #04	51.96	1.84	13.13	12.04	0.2226	6.92	10.99	2.7	0.2059	0.2117	100.22
VG-2 #05	51.82	1.84	13.06	11.86	0.2058	6.91	11.09	2.5	0.2075	0.1816	99.6749
VG-2 #06	51.76	1.95	13.32	11.6	0.2163	7.1	10.93	2.71	0.2261	0.1916	100.004
VG-2 #07	51.39	1.89	13.32	11.95	0.2121	6.97	10.96	2.66	0.1987	0.1681	99.7189
VG-2 #08	51.94	1.91	13.21	11.72	0.2228	7.02	10.95	2.7	0.1983	0.2018	100.073
VG-2 #09	52.33	1.87	13.23	11.85	0.1804	7.02	10.9	2.65	0.2133	0.1952	100.439
VG-2 #10	52.16	1.98	13.28	11.84	0.1718	7.02	11.02	2.57	0.2003	0.2219	100.464
VG-2 #11	51.02	1.92	13.97	12.21	0.2314	7.07	9.84	2.7	0.1734	0.2007	99.3355
VG-2 #12	51.46	1.79	14.06	11.89	0.2315	7.08	9.87	2.68	0.2061	0.1975	99.4651
VG-2 #13	51.35	1.87	13.89	12	0.1912	7.06	9.85	2.67	0.1855	0.2316	99.2983
VG-2 #14	51.01	1.82	14.09	12.1	0.2438	6.97	9.83	2.65	0.1829	0.2279	99.1246
VG-2 #15	51.79	1.85	14.15	12.04	0.2351	6.96	9.95	2.77	0.2039	0.2487	100.198
Average	51.6153	1.872	13.5053	11.88	0.210873	6.98533	10.62	2.658	0.196467	0.20444	99.7478
SD	0.384671	0.0525611	0.383403	0.172163	0.0225126	0.0839735	0.534428	0.064	0.0142218	0.0234612	0.433488
Reference value	50.81	1.85	14.06	11.8348	0.22	6.95	11.12	2.62	0.19	0.2	99.8548
Deviation (%)	1.58499	1.18919	-3.945	0.382179	-4.14848	0.508393	-4.4964	1.45038	3.40351	2.22	-0.107146
VG-568
VG-568 #01	79.66	0.0662	11.32	0.9995	0.0518	0.0295	0.4279	3.32	4.91	0.0319	100.817
VG-568 #02	79.85	0.0918	11.27	1.1234	0.0259	0.0359	0.4523	2.93	5.07	0.0354	100.885
VG-568 #03	79.71	0.0862	11.27	1.0287	0.0119	0.035	0.474	2.94	4.9	0.0389	100.495
VG-568 #04	79.6	0.1103	11.31	1.2267	0	0.0292	0.4684	3.43	4.95	0	101.125
VG-568 #05	79.85	0.0876	11.27	1.0083	0.067	0.0184	0.4405	3.43	4.89	0.0425	101.104
VG-568 #06	79.51	0.0776	11.86	1.0509	0.0292	0.0416	0.4732	3.46	4.98	0.0212	101.504
VG-568 #07	79.67	0.0484	11.55	1.0426	0.0313	0.0116	0.4419	3.32	5.06	0.0071	101.183
VG-568 #08	79.83	0.0619	11.61	0.9477	0	0.0334	0.4603	3.57	5.03	0.0141	101.557
VG-568 #09	79.72	0.0598	11.75	1.191	0.013	0.0253	0.4579	3.48	4.98	0	101.677
VG-568 #10	80.06	0.0676	11.56	1.0775	0.0173	0.0223	0.4228	3.48	4.94	0.0177	101.665
VG-568 #11	79.05	0.0767	12.42	1.0976	0	0.0302	0.3977	3.5	4.61	0	101.182
VG-568 #12	79.06	0.0598	12.54	1.0774	0	0.0317	0.3804	3.48	4.58	0	101.209
VG-568 #13	77.16	0.0995	12.2	3.05	0.0171	0.029	0.3908	3.37	4.45	0	100.766
VG-568 #14	78.46	0.0654	12.31	1.1026	0	0.0384	0.3962	3.53	4.54	0.0215	100.464
VG-568 #15	78.12	0.0907	12.32	1.224	0.032	0.0374	0.3976	3.58	4.48	0.0393	100.321
Average	79.2873	0.0766333	11.7707	1.21653	0.0197667	0.0299267	0.432127	3.388	4.82467	0.0179733	101.064
S.D.	0.801957	0.0173092	0.469429	0.513573	0.02025	0.00797536	0.0326706	0.199435	0.223347	0.0163954	0.434771
Referemce value	76.71	0.12	12.06	1.2272	0.03	<0.1	0.5	3.75	4.89	<0,01	99.34
Deviation (%)	3.35984	-36.1389	-2.39912	-0.869731	-34.1111		-13.5747	-9.65333	-1.33606		1.73507

## Sheet: DC-03
Experiment	DC-03
Label	Distance (µm)	SiO2	TiO2	Al2O3	FeO	MnO	MgO	CaO	Na2O	K2O	P2O5
Transect 1
DC-03_tr1 001	0	49.8571	3.56637	16.4094	5.5351	0.174814	5.34956	9.66838	6.05047	2.56655	0.822224
DC-03_tr1 002	30.9	50.1612	3.59394	16.45	5.37038	0.220257	5.34984	9.46747	6.14051	2.48495	0.761505
DC-03_tr1 003	61.9	50.3869	3.65869	16.1807	5.24584	0.210246	5.28707	9.66719	6.08064	2.48379	0.798935
DC-03_tr1 004	92.8	50.1684	3.53936	16.3387	5.41193	0.18664	5.45308	9.47602	6.20417	2.47961	0.742134
DC-03_tr1 005	123.7	50.0641	3.51507	16.4242	5.35483	0.250063	5.33428	9.57909	6.09485	2.477	0.906519
DC-03_tr1 006	154.7	50.3301	3.58247	16.4257	5.28595	0.184079	5.39952	9.42593	6.04994	2.53973	0.776581
DC-03_tr1 007	185.6	50.0453	3.62408	16.3651	5.4516	0.1906	5.4103	9.5816	6.10208	2.48833	0.741025
DC-03_tr1 008	216.5	50.0551	3.5717	16.0521	5.54229	0.207939	5.41913	9.76059	6.12731	2.5864	0.677391
DC-03_tr1 009	247.5	50.1468	3.48641	16.2391	5.66671	0.226977	5.31704	9.57478	6.15007	2.49911	0.693066
DC-03_tr1 010	278.4	50.2566	3.65746	16.4225	5.3162	0.237477	5.3368	9.43728	6.0992	2.49325	0.743237
DC-03_tr1 011	309.4	50.455	3.45202	16.2019	5.39379	0.266299	5.32187	9.51361	6.13351	2.47601	0.785952
DC-03_tr1 012	340.3	49.9886	3.58242	16.3015	5.42008	0.179637	5.35814	9.57032	6.30794	2.4984	0.792881
DC-03_tr1 013	371.2	50.2876	3.52624	16.2041	5.2635	0.2063	5.36691	9.63769	6.18384	2.57488	0.748886
DC-03_tr1 014	402.2	49.9715	3.56351	16.5404	5.37616	0.172511	5.32466	9.59881	6.23099	2.4512	0.770273
DC-03_tr1 015	433.1	50.2445	3.55504	16.1162	5.47167	0.230923	5.3274	9.60375	6.12085	2.52459	0.805087
DC-03_tr1 016	464	50.1681	3.51588	16.3869	5.51026	0.221439	5.30466	9.61212	6.00372	2.51868	0.758278
DC-03_tr1 017	495	49.8021	3.5279	16.3333	5.70841	0.165698	5.35871	9.67859	6.15069	2.57136	0.703318
DC-03_tr1 018	525.9	49.8838	3.58453	16.2698	5.35096	0.231393	5.42327	9.66892	6.23935	2.49987	0.848097
DC-03_tr1 019	556.8	50.5447	3.45622	15.9109	5.56267	0.194182	5.30704	9.54039	6.26823	2.46435	0.75137
DC-03_tr1 020	587.8	49.8858	3.58022	16.5598	5.53026	0.224409	5.32391	9.55414	6.0771	2.54846	0.715839
DC-03_tr1 021	618.7	50.4996	3.55051	16.0442	5.54703	0.183392	5.24858	9.6224	6.08218	2.52138	0.700737
DC-03_tr1 022	649.6	50.1242	3.617	16.2148	5.56935	0.19616	5.31246	9.56655	6.21671	2.46613	0.716618
DC-03_tr1 023	680.6	49.8532	3.56464	16.3767	5.51744	0.182881	5.35212	9.62968	6.1787	2.58307	0.761592
DC-03_tr1 024	711.5	49.8989	3.55908	16.5338	5.39503	0.177236	5.28221	9.68234	6.113	2.53341	0.824948
DC-03_tr1 025	742.4	50.1835	3.50524	16.0665	5.62277	0.211548	5.263	9.64197	6.18813	2.53898	0.778348
DC-03_tr1 026	773.4	50.4	3.58898	16.0116	5.40918	0.21719	5.29606	9.56376	6.1496	2.58119	0.78248
DC-03_tr1 027	804.3	50.0894	3.47328	16.511	5.34905	0.197987	5.28722	9.62624	6.14265	2.58692	0.736294
DC-03_tr1 028	835.3	50.2819	3.57907	16.3012	5.46117	0.207237	5.19377	9.59562	6.11939	2.56089	0.69977
DC-03_tr1 029	866.2	50.083	3.56562	16.2765	5.5899	0.230172	5.18915	9.52543	6.20643	2.54834	0.785463
DC-03_tr1 030	897.1	50.0421	3.58095	15.7607	5.49687	0.235841	5.43985	9.7963	6.28377	2.60018	0.763404
DC-03_tr1 031	928.1	50.3107	3.54604	16.2544	5.56502	0.224036	5.18582	9.32628	6.1492	2.54167	0.896861
DC-03_tr1 032	959	50.4962	3.60911	15.9906	5.3928	0.250551	5.24676	9.42957	6.22727	2.58687	0.770221
DC-03_tr1 033	989.9	50.2375	3.61339	16.3169	5.42524	0.1957	5.25023	9.49159	6.0635	2.61482	0.791138
DC-03_tr1 034	1020.9	50.2928	3.65411	16.4692	5.38337	0.205453	5.17751	9.3154	6.09361	2.66595	0.742555
DC-03_tr1 035	1051.8	50.3403	3.60311	16.1675	5.26529	0.212677	5.224	9.5085	6.27706	2.62232	0.77916
DC-03_tr1 036	1082.7	50.3674	3.51496	16.1196	5.46202	0.257012	5.24682	9.37664	6.2306	2.58242	0.842463
DC-03_tr1 037	1113.7	50.7211	3.52985	16.3256	5.24347	0.198144	5.06903	9.45056	6.12594	2.61661	0.71972
DC-03_tr1 038	1144.6	50.4509	3.65661	16.3157	5.37676	0.219706	5.20165	9.31148	6.09778	2.61628	0.753158
DC-03_tr1 039	1175.5	50.5112	3.58163	16.3629	5.39291	0.204153	5.08591	9.31224	6.13994	2.68111	0.727992
DC-03_tr1 040	1206.5	50.3984	3.49489	16.2101	5.54043	0.22686	5.17039	9.43621	6.16746	2.63145	0.723751
DC-03_tr1 041	1237.4	50.5152	3.52001	16.3958	5.41381	0.223963	5.13592	9.33522	6.1137	2.61427	0.7321
DC-03_tr1 042	1268.3	50.4682	3.60045	16.4754	5.36457	0.203647	5.11697	9.29515	6.07641	2.62039	0.778791
DC-03_tr1 043	1299.3	50.7234	3.52375	16.1144	5.40926	0.207613	5.17228	9.16998	6.29535	2.67887	0.705058
DC-03_tr1 044	1330.2	50.7137	3.489	16.3778	5.30533	0.22658	4.91539	9.17402	6.31099	2.71937	0.767888
DC-03_tr1 045	1361.2	50.6272	3.44906	16.3728	5.32756	0.218954	5.12226	9.21802	6.17956	2.75103	0.733541
DC-03_tr1 046	1392.1	50.6594	3.46415	16.5142	5.35651	0.165452	5.03595	9.21362	6.24582	2.65758	0.68735
DC-03_tr1 047	1423	50.9845	3.38529	16.3212	5.30361	0.214401	4.96509	9.17105	6.24739	2.66719	0.740352
DC-03_tr1 048	1454	50.9058	3.43429	16.2536	5.36285	0.142941	5.03283	9.07559	6.33229	2.75362	0.706246
DC-03_tr1 049	1484.9	50.8466	3.52658	16.4367	5.21768	0.219844	4.98052	9.06392	6.29009	2.70165	0.716349
DC-03_tr1 050	1515.8	51.2205	3.44783	16.2348	5.20798	0.210908	5.00091	8.94572	6.3262	2.67129	0.73388
DC-03_tr1 051	1546.8	51.032	3.41447	16.3627	5.09085	0.220501	5.00858	9.02984	6.36614	2.70484	0.770107
DC-03_tr1 052	1577.7	50.9441	3.50021	16.3963	5.27613	0.199275	4.98703	8.82797	6.38092	2.77745	0.710677
DC-03_tr1 053	1608.6	51.0709	3.43916	16.3799	4.92636	0.200462	4.91603	9.03682	6.3929	2.82982	0.807633
DC-03_tr1 054	1639.6	51.7167	3.39825	16.4012	5.15747	0.165542	4.81873	8.70869	6.11903	2.72078	0.793616
DC-03_tr1 055	1670.5	51.4563	3.39699	16.4631	5.06479	0.18223	4.809	8.86083	6.29262	2.77285	0.701295
DC-03_tr1 056	1701.4	51.4675	3.34312	16.3028	5.02499	0.205952	4.79799	8.8737	6.387	2.84784	0.749105
DC-03_tr1 057	1732.4	51.2459	3.40955	16.5343	5.10405	0.198411	4.77542	8.719	6.43912	2.73175	0.842528
DC-03_tr1 058	1763.3	51.6089	3.38032	16.2851	5.03452	0.169941	4.8393	8.70252	6.4113	2.87687	0.691167
DC-03_tr1 059	1794.2	51.3376	3.32106	16.7184	4.87363	0.245635	4.85307	8.63681	6.37479	2.88922	0.749758
DC-03_tr1 060	1825.2	51.3789	3.36507	16.4765	4.91423	0.227758	4.7193	8.73071	6.46339	2.9034	0.820749
DC-03_tr1 061	1856.1	51.948	3.30039	16.3896	4.74112	0.201702	4.73091	8.52176	6.53948	2.91211	0.714949
DC-03_tr1 062	1887.1	52.0234	3.26046	16.4052	4.8547	0.200873	4.62842	8.47515	6.42836	2.98276	0.74065
DC-03_tr1 063	1918	51.6279	3.28644	16.5657	4.85777	0.215878	4.62156	8.54474	6.55234	2.99888	0.728768
DC-03_tr1 064	1948.9	52.4978	3.22333	16.5789	4.76003	0.220011	4.51016	8.19575	6.42167	2.96096	0.631422
DC-03_tr1 065	1979.9	52.2469	3.21758	16.3155	4.81085	0.154568	4.57289	8.29742	6.59035	3.0417	0.752252
DC-03_tr1 066	2010.8	52.4564	3.20344	16.4279	4.77436	0.238718	4.51768	8.19342	6.51983	3.03916	0.629086
DC-03_tr1 067	2041.7	52.6592	3.18152	16.4105	4.60807	0.182886	4.37202	8.21037	6.69145	3.06862	0.615367
DC-03_tr1 068	2072.7	52.602	3.02405	16.7351	4.41264	0.191112	4.39207	8.12584	6.61382	3.14748	0.755909
DC-03_tr1 069	2103.6	52.5491	3.0125	16.8309	4.62671	0.186508	4.31826	7.9785	6.72415	3.15644	0.616894
DC-03_tr1 070	2134.5	53.1962	3.06704	16.6379	4.26718	0.213462	4.31847	7.85736	6.65722	3.21064	0.574531
DC-03_tr1 071	2165.5	53.3317	2.95489	16.6623	4.4426	0.171958	4.11428	7.7053	6.68955	3.27296	0.654386
DC-03_tr1 072	2196.4	54.4558	2.88216	16.8974	4.15935	0.196778	3.75246	7.58403	6.23902	3.20993	0.623111
DC-03_tr1 073	2227.3	53.7479	2.83099	16.6793	4.5071	0.212682	3.93477	7.49139	6.6329	3.37266	0.590216
DC-03_tr1 074	2258.3	54.346	2.79196	16.7108	4.10101	0.13878	3.87601	7.38386	6.76001	3.3033	0.588254
DC-03_tr1 075	2289.2	54.7957	2.65589	16.7795	4.09707	0.170265	3.74707	7.15443	6.74266	3.35589	0.501531
DC-03_tr1 076	2320.1	54.741	2.65603	17.0745	3.84561	0.147979	3.60975	6.86057	6.97337	3.5072	0.58402
DC-03_tr1 077	2351.1	55.2832	2.34833	16.8793	3.85577	0.167665	3.58915	6.70658	7.01423	3.60966	0.546166
DC-03_tr1 078	2382	55.8707	2.31897	17.2384	3.5708	0.202961	3.34506	6.33099	6.96717	3.66315	0.491806
DC-03_tr1 079	2412.9	56.71	2.10341	17.0941	3.39624	0.16581	3.07816	5.9819	7.19264	3.8477	0.430019
DC-03_tr1 080	2443.9	57.127	1.94296	17.3632	3.31022	0.145259	2.96069	5.66438	7.17557	4.01955	0.291135
DC-03_tr1 081	2474.8	58.211	1.79442	17.2162	3.07615	0.151449	2.71727	5.17819	7.26997	4.10153	0.283826
DC-03_tr1 082	2505.8	59.3844	1.56384	17.3475	2.74557	0.151983	2.38566	4.81245	7.27009	4.24689	0.0916217
DC-03_tr1 083	2536.7	60.1315	1.25368	17.5269	2.52713	0.133184	2.23162	4.37153	7.30626	4.38172	0.136547
DC-03_tr1 084	2567.6	61.2315	1.10838	17.2744	2.2474	0.135764	1.92051	4.03511	7.35513	4.59696	0.0949017
DC-03_tr1 085	2598.6	61.938	0.905784	17.391	2.14956	0.10758	1.68362	3.60307	7.38016	4.7495	0.0917146
DC-03_tr1 086	2629.5	62.7335	0.79952	17.341	1.7443	0.110472	1.4748	3.39679	7.37501	4.94727	0.0774223
DC-03_tr1 087	2660.4	62.7446	0.776838	17.8654	1.55039	0.0859389	1.30202	3.18292	7.41313	4.99	0.0887111
DC-03_tr1 088	2691.4	63.1944	0.755698	17.7565	1.4193	0.0833198	1.10715	2.9407	7.51512	5.13601	0.0917947
DC-03_tr1 089	2722.3	63.3839	0.732915	17.9785	1.18319	0.0964228	0.986675	2.70392	7.43833	5.40784	0.08826
DC-03_tr1 090	2753.2	63.6666	0.751756	18.1701	1.08287	0.120285	0.897199	2.57681	7.28229	5.36751	0.0846375
DC-03_tr1 091	2784.2	63.6915	0.771029	18.0558	1.0458	0.130738	0.771029	2.46541	7.67244	5.35025	0.0460346
DC-03_tr1 092	2815.1	63.8537	0.802348	18.1537	0.951387	0.112671	0.743364	2.36344	7.64044	5.28718	0.0917871
DC-03_tr1 093	2846	64.0603	0.759575	18.2253	0.844496	0.113434	0.706038	2.29739	7.52806	5.40502	0.0604091
DC-03_tr1 094	2877	64.2107	0.864755	18.0844	0.862415	0.109239	0.68086	2.21732	7.49617	5.42124	0.0528902
DC-03_tr1 095	2907.9	63.9712	0.796472	18.3023	0.75529	0.148176	0.646355	2.20731	7.65406	5.41609	0.102701
DC-03_tr1 096	2938.8	63.9859	0.831037	18.245	0.73781	0.106985	0.64756	2.22801	7.54648	5.57515	0.0959994
DC-03_tr1 097	2969.8	63.9878	0.802836	18.1859	0.763502	0.14702	0.659188	2.19661	7.71368	5.47621	0.0672265
DC-03_tr1 098	3000.7	63.9923	0.776523	18.2236	0.722702	0.134042	0.661922	2.17946	7.74579	5.45377	0.109894
DC-03_tr1 099	3031.7	63.9511	0.834429	18.2455	0.748003	0.146904	0.641963	2.17597	7.66187	5.51655	0.0777425
DC-03_tr1 100	3062.6	63.9016	0.758545	18.4094	0.78858	0.159065	0.641673	2.17603	7.63142	5.44518	0.0884713
DC-03_tr1 101	3093.5	63.8821	0.824002	18.3247	0.664781	0.157491	0.651851	2.15825	7.76765	5.46688	0.102313
DC-03_tr1 102	3124.5	63.9082	0.803964	18.2975	0.744983	0.137282	0.662491	2.12618	7.70742	5.5199	0.0921006
DC-03_tr1 103	3155.4	63.9237	0.796122	18.3846	0.72297	0.157393	0.6429	2.10603	7.7323	5.46348	0.0705064
DC-03_tr1 104	3186.3	64.1364	0.793	18.2678	0.763183	0.16777	0.630744	2.15456	7.56648	5.45277	0.0672917
DC-03_tr1 105	3217.3	64.1506	0.757186	18.0424	0.790836	0.165695	0.672497	2.12744	7.71198	5.48226	0.0991103
DC-03_tr1 106	3248.2	64.0657	0.7813	18.1015	0.788148	0.154645	0.683484	2.14643	7.76802	5.46828	0.0424175
DC-03_tr1 107	3279.1	64.1312	0.793646	18.2473	0.774234	0.144875	0.647034	2.12511	7.67286	5.43537	0.0283007
DC-03_tr1 108	3310.1	64.0049	0.786642	18.3089	0.736829	0.116807	0.655806	2.10435	7.76679	5.45912	0.0598775
DC-03_tr1 109	3341	63.7193	0.79803	18.4839	0.610113	0.154067	0.655861	2.11304	7.79566	5.54928	0.12073
DC-03_tr1 110	3371.9	64.1017	0.831747	18.1015	0.701253	0.186742	0.608189	2.10673	7.76216	5.53271	0.0672925
DC-03_tr1 111	3402.9	64.1002	0.792786	18.2386	0.753208	0.135769	0.618153	2.04011	7.71161	5.53889	0.0706898
DC-03_tr1 112	3433.8	63.945	0.835474	18.2508	0.763874	0.09079	0.662664	2.08404	7.73778	5.54025	0.0892424
DC-03_tr1 113	3464.7	64.0626	0.774853	18.2656	0.686699	0.130746	0.635097	2.10914	7.7301	5.47762	0.127572
DC-03_tr1 114	3495.7	64.064	0.805048	18.2119	0.783857	0.160518	0.650467	2.04743	7.67785	5.52805	0.0709433
DC-03_tr1 115	3526.6	63.8514	0.792935	18.2022	0.763795	0.211367	0.665602	2.11367	7.78775	5.55096	0.060332
DC-03_tr1 116	3557.6	63.9148	0.777304	18.2394	0.797832	0.147598	0.66173	2.12468	7.71864	5.52211	0.0958671
DC-03_tr1 117	3588.5	63.9166	0.771154	18.1815	0.81208	0.14713	0.671089	2.07701	7.85785	5.48412	0.0814433
DC-03_tr1 118	3619.4	63.9869	0.826898	18.1913	0.770114	0.166873	0.64079	2.0565	7.85768	5.45331	0.0496221
DC-03_tr1 119	3650.4	64.0423	0.749027	17.9705	0.798551	0.158744	0.642786	2.16796	7.86016	5.51752	0.0924724
DC-03_tr1 120	3681.3	63.9093	0.80635	18.2583	0.71041	0.122812	0.672708	2.05368	7.82646	5.548	0.0919558
DC-03_tr1 121	3712.2	63.8028	0.836052	18.2029	0.763921	0.169336	0.638441	2.10509	7.89409	5.55166	0.035704
DC-03_tr1 122	3743.2	64.2389	0.73545	17.9857	0.754042	0.154691	0.650298	2.0646	7.86809	5.42343	0.124801
DC-03_tr1 123	3774.1	63.8635	0.793764	18.3129	0.698134	0.113954	0.674149	2.0382	7.78221	5.64107	0.0821455
DC-03_tr1 124	3805	63.8828	0.770943	18.2654	0.744602	0.127316	0.659248	2.12364	7.86155	5.47246	0.0920925
DC-03_tr1 125	3836	63.8658	0.795397	18.2811	0.68105	0.108085	0.639581	2.12475	7.95499	5.47098	0.0783182
DC-03_tr1 126	3866.9	64.0109	0.793116	18.0575	0.68182	0.11888	0.673519	2.02916	8.01418	5.58533	0.0355616
DC-03_tr1 127	3897.8	63.7142	0.776431	18.2099	0.801113	0.135294	0.657114	2.10981	7.94764	5.51009	0.138367
DC-03_tr1 128	3928.8	63.9556	0.785119	18.0929	0.726074	0.13767	0.678202	2.06044	7.96497	5.54575	0.0533048
DC-03_tr1 129	3959.7	63.7804	0.783645	18.4943	0.769528	0.155998	0.688178	2.00075	7.76942	5.49446	0.0633741
DC-03_tr1 130	3990.6	64.0754	0.779711	18.147	0.663692	0.143443	0.634331	2.07977	7.9011	5.51548	0.0600484
DC-03_tr1 131	4021.6	63.6312	0.839434	18.4341	0.691941	0.0866585	0.669077	2.10267	7.91052	5.54247	0.0919662
DC-03_tr1 132	4052.5	63.8243	0.810306	18.1081	0.723711	0.134248	0.674931	2.04959	7.97291	5.59539	0.106476
DC-03_tr1 134	4114.4	63.9526	0.813532	18.2298	1.05121	0.180046	0.627652	2.09832	7.43111	5.52727	0.0885387
DC-03_tr1 135	4145.3	64.1645	0.799001	18.1698	0.727707	0.0984874	0.686357	1.97586	7.7303	5.59148	0.0565259
DC-03_tr1 136	4176.3	63.9178	0.730152	18.1232	0.789982	0.140662	0.651164	2.01824	7.991	5.55272	0.0851349
DC-03_tr1 137	4207.2	63.924	0.851433	18.1894	0.713759	0.11536	0.653571	2.04721	7.79986	5.59911	0.10625
DC-03_tr1 138	4238.1	64.0211	0.725339	18.1283	0.62939	0.114912	0.662678	2.06121	8.10055	5.51373	0.0427701
DC-03_tr1 139	4269.1	64.2458	0.826077	18.0314	0.666624	0.13064	0.654644	2.01381	7.83838	5.53541	0.057213
DC-03_tr1 140	4300	63.9604	0.81089	18.1953	0.706785	0.181543	0.653246	2.06158	7.81556	5.49756	0.117131
Transect 2
DC-03_tr2 001	0	48.8786	3.54355	17.2405	5.59454	0.219822	5.27978	9.87929	6.09206	2.42667	0.845171
DC-03_tr2 002	49.4793	48.9875	3.65548	17.0148	5.80397	0.237657	5.22357	9.80565	5.99743	2.44378	0.830171
DC-03_tr2 003	98.8531	48.8387	3.58496	17.1022	5.83953	0.221902	5.18956	9.75962	6.00202	2.51861	0.942855
DC-03_tr2 004	148.332	49.0591	3.57585	17.1297	5.62209	0.229442	5.26755	9.75509	6.01716	2.45143	0.892646
DC-03_tr2 005	197.812	48.8958	3.55291	17.2861	5.66023	0.2259	5.22247	9.77305	5.96563	2.53489	0.883036
DC-03_tr2 006	247.186	48.9202	3.5845	17.1282	5.86554	0.245619	5.224	9.7148	6.04884	2.47452	0.793783
DC-03_tr2 007	296.665	49.1808	3.56678	17.1511	5.50303	0.229701	5.15655	9.85451	5.99219	2.52732	0.83799
DC-03_tr2 008	346.144	49.2358	3.49657	16.9052	5.55398	0.230875	5.2702	9.97284	6.05059	2.50334	0.780598
DC-03_tr2 009	395.524	49.2435	3.4618	16.971	5.61261	0.212521	5.26439	9.87329	5.97108	2.5605	0.829295
DC-03_tr2 010	444.997	49.0506	3.54998	17.2428	5.51768	0.212593	5.23369	9.89937	5.95382	2.48499	0.854531
DC-03_tr2 011	494.476	48.7093	3.61905	17.351	5.58659	0.23427	5.17881	9.84789	6.16767	2.50785	0.797516
DC-03_tr2 012	543.956	49.3091	3.56268	16.8593	5.72464	0.209498	5.14609	9.75423	6.0596	2.50707	0.867832
DC-03_tr2 013	593.33	49.4454	3.53691	17.0934	5.59586	0.215884	5.15757	9.75454	5.86088	2.50744	0.832142
DC-03_tr2 014	642.809	48.956	3.52945	17.0489	5.82157	0.227285	5.21305	9.75671	6.02441	2.53553	0.88713
DC-03_tr2 015	692.288	49.1338	3.55453	17.1328	5.65678	0.250544	5.11852	9.82066	5.96145	2.53895	0.831963
DC-03_tr2 016	741.662	48.9751	3.6244	17.188	5.67518	0.224165	5.23863	9.72599	5.95945	2.57871	0.810364
DC-03_tr2 017	791.141	49.2451	3.54157	17.1465	5.72571	0.243725	5.13374	9.72655	5.91962	2.57197	0.745464
DC-03_tr2 018	840.621	49.2969	3.49444	17.1785	5.55059	0.160744	5.19608	9.64263	6.09754	2.54233	0.840286
DC-03_tr2 019	889.994	48.9244	3.60667	17.2183	5.64434	0.20774	5.24699	9.63816	6.04168	2.57765	0.894128
DC-03_tr2 020	939.474	49.2846	3.58102	17.1059	5.44234	0.240556	5.12875	9.67078	6.15045	2.53909	0.856511
DC-03_tr2 021	988.953	49.1623	3.51738	17.2017	5.67647	0.230708	5.2406	9.74122	5.91974	2.50373	0.80616
DC-03_tr2 022	1038.33	48.9627	3.5685	17.3748	5.5205	0.243797	5.1545	9.81084	6.01867	2.5315	0.814147
DC-03_tr2 023	1087.81	49.3388	3.61238	17.0905	5.4641	0.197821	5.21113	9.66336	6.04087	2.58027	0.800794
DC-03_tr2 024	1137.29	49.6375	3.53245	17.0006	5.46664	0.23699	5.14089	9.60989	6.01636	2.54499	0.813685
DC-03_tr2 025	1186.66	49.3038	3.61751	16.9291	5.49739	0.231988	5.22303	9.68395	6.06644	2.55055	0.896248
DC-03_tr2 026	1236.14	49.1509	3.59564	16.9777	5.63838	0.204899	5.28403	9.73429	6.06569	2.57427	0.774261
DC-03_tr2 027	1285.62	49.269	3.51345	17.2543	5.58315	0.215451	5.2096	9.56102	6.03748	2.50384	0.852718
DC-03_tr2 028	1335	49.3768	3.57994	17.2386	5.43094	0.248053	5.07498	9.68212	5.94962	2.56291	0.856033
DC-03_tr2 029	1384.47	49.3851	3.55573	17.2316	5.33866	0.205948	5.17657	9.59337	6.11869	2.61361	0.78074
DC-03_tr2 030	1433.95	49.4229	3.61532	17.1906	5.24476	0.217428	5.21421	9.60351	5.99837	2.67839	0.814516
DC-03_tr2 031	1483.43	49.478	3.55591	17.1903	5.35419	0.240989	5.17131	9.58065	6.05521	2.61106	0.762388
DC-03_tr2 032	1532.8	49.5216	3.57278	17.1433	5.39978	0.207465	5.10543	9.51051	6.02907	2.62884	0.881219
DC-03_tr2 033	1582.28	49.567	3.50515	17.152	5.33348	0.228188	5.11125	9.58612	6.09108	2.62633	0.799416
DC-03_tr2 034	1631.76	49.0341	3.62953	17.4703	5.51002	0.173287	5.07528	9.50351	6.14695	2.53764	0.919414
DC-03_tr2 035	1681.14	49.5323	3.56187	17.3237	5.40352	0.19651	5.11007	9.5017	6.02078	2.60057	0.749005
DC-03_tr2 036	1730.61	49.3907	3.56334	17.3207	5.36526	0.257229	5.08181	9.42463	6.07388	2.63201	0.89043
DC-03_tr2 037	1780.09	49.2921	3.5976	17.1671	5.16838	0.274735	5.10757	9.48549	6.19192	2.64499	1.07006
DC-03_tr2 038	1829.47	49.5815	3.5858	16.9945	5.51583	0.243997	5.0384	9.41653	6.16595	2.69189	0.765614
DC-03_tr2 039	1878.95	49.8006	3.50104	17.2705	5.19543	0.234049	4.97087	9.33952	6.13448	2.77634	0.777272
DC-03_tr2 040	1928.43	49.92	3.5142	17.2358	5.16974	0.196125	4.9666	9.29334	6.19556	2.68136	0.82726
DC-03_tr2 041	1977.81	49.9642	3.56233	17.2519	5.13993	0.173842	5.0178	9.3333	6.09667	2.66666	0.793382
DC-03_tr2 042	2027.28	49.7219	3.51528	17.4139	5.37452	0.18125	4.99861	9.08284	6.21778	2.7025	0.791446
DC-03_tr2 043	2076.76	49.9271	3.43767	17.4007	5.10595	0.218191	4.88351	9.30192	6.11702	2.79058	0.817457
DC-03_tr2 044	2126.14	49.6837	3.53729	17.3529	5.28572	0.246397	4.83092	9.21716	6.15488	2.7894	0.901604
DC-03_tr2 045	2175.61	50.0971	3.45149	17.4593	5.17724	0.196896	4.80383	9.14342	6.12589	2.81569	0.729153
DC-03_tr2 046	2225.09	50.3425	3.43797	17.4028	4.98963	0.250597	4.75637	9.05637	6.20661	2.79906	0.758078
DC-03_tr2 047	2274.47	50.1885	3.37836	17.6933	4.99146	0.226543	4.76826	8.9481	6.1886	2.84067	0.776212
DC-03_tr2 048	2323.94	50.6821	3.37273	17.3093	4.85147	0.214518	4.80083	8.8319	6.26943	2.86632	0.801353
DC-03_tr2 049	2373.42	50.547	3.29455	17.3777	4.96216	0.243431	4.71812	8.70412	6.43658	2.86748	0.848855
DC-03_tr2 050	2422.8	50.6492	3.30828	17.5664	4.8305	0.202658	4.61739	8.66648	6.33242	3.06473	0.762021
DC-03_tr2 051	2472.28	51.4157	3.16918	17.5976	4.56646	0.249181	4.4652	8.5254	6.29786	2.9768	0.736708
DC-03_tr2 052	2521.76	51.5649	3.11773	17.5958	4.59509	0.214879	4.35056	8.41584	6.42905	3.08717	0.628947
DC-03_tr2 053	2571.24	51.9626	3.02734	17.6053	4.43943	0.183266	4.39879	8.11694	6.46104	3.13909	0.666117
DC-03_tr2 054	2620.61	52.3425	3.0011	17.7237	4.62796	0.173094	4.13283	7.9019	6.38619	3.18299	0.52777
DC-03_tr2 056	2719.57	52.8868	2.85656	17.8991	4.07211	0.190842	4.01133	7.57696	6.54374	3.33265	0.629962
DC-03_tr2 057	2768.95	53.2177	2.76879	17.8139	3.96995	0.186995	3.87834	7.50219	6.67766	3.44062	0.543883
DC-03_tr2 058	2818.42	53.4482	2.65418	18.0423	3.87996	0.209396	3.75839	7.21287	6.62531	3.51526	0.654122
DC-03_tr2 059	2867.9	54.1734	2.55544	17.8576	3.67536	0.186008	3.47174	6.87221	6.89257	3.74663	0.569121
DC-03_tr2 060	2917.28	55.039	2.24834	18.2186	3.43804	0.179766	3.30697	6.45263	6.7551	3.75059	0.610984
DC-03_tr2 061	2966.75	55.7808	2.07154	18.4126	3.37883	0.167835	2.9967	5.85261	6.97889	3.98219	0.378006
DC-03_tr2 062	3016.23	57.4112	1.70628	18.5482	2.991	0.172233	2.5293	5.08872	7.11617	4.2155	0.221414
DC-03_tr2 063	3065.61	58.9228	1.33677	18.5875	2.5645	0.151548	2.14045	4.5434	7.10789	4.5333	0.111768
DC-03_tr2 064	3115.09	60.6191	0.960521	18.6591	2.0676	0.133684	1.76354	3.84127	7.22646	4.69264	0.0360816
DC-03_tr2 065	3164.57	61.2266	0.790721	19.0379	1.80881	0.136823	1.38318	3.33467	7.27564	4.94138	0.0642682
DC-03_tr2 066	3213.94	62.0285	0.793257	19.1476	1.44814	0.0801504	1.11134	2.90633	7.29097	5.11876	0.074921
DC-03_tr2 067	3263.42	62.5709	0.788375	19.3583	1.08097	0.08982	0.887895	2.64711	7.28462	5.2134	0.0786052
DC-03_tr2 068	3312.9	62.6769	0.802438	19.4267	0.917361	0.0679227	0.764332	2.47635	7.30775	5.4884	0.0718646
DC-03_tr2 069	3362.28	62.9347	0.839896	19.2236	0.884028	0.110579	0.699196	2.33166	7.51534	5.37382	0.0871619
DC-03_tr2 070	3411.76	62.8622	0.762018	19.5614	0.774502	0.112556	0.67	2.26522	7.42991	5.48686	0.0753058
DC-03_tr2 071	3461.23	62.8883	0.761162	19.4077	0.863552	0.145002	0.648573	2.28207	7.46217	5.45274	0.0887585
DC-03_tr2 072	3510.71	62.8984	0.791377	19.5735	0.842696	0.173942	0.647864	2.14917	7.42167	5.4131	0.0882767
DC-03_tr2 073	3560.09	62.7929	0.791287	19.6491	0.814078	0.160145	0.640379	2.11853	7.51024	5.462	0.061347
DC-03_tr2 074	3609.56	62.9559	0.821477	19.7319	0.716267	0.10831	0.626259	2.1502	7.22068	5.53052	0.138513
DC-03_tr2 075	3659.04	63.0476	0.783523	19.4951	0.889741	0.152243	0.622336	2.13039	7.22525	5.57721	0.0765736
DC-03_tr2 076	3708.42	63.2547	0.813933	19.8723	0.72785	0.163348	0.62012	2.14457	6.81451	5.50171	0.0869852
DC-03_tr2 077	3757.89	63.3773	0.770233	19.8561	0.808527	0.166041	0.653731	2.1173	6.56466	5.60225	0.0838817
DC-03_tr2 078	3807.37	63.6407	0.81527	19.6178	0.73083	0.160019	0.632537	2.13901	6.5189	5.66329	0.0815881
DC-03_tr2 079	3856.75	63.6733	0.830512	19.7939	0.764769	0.130573	0.625573	2.08998	6.3308	5.70178	0.058844
DC-03_tr2 080	3906.23	63.431	0.806965	19.814	0.727588	0.15271	0.650327	2.14559	6.55766	5.62085	0.0932779
DC-03_tr2 081	3955.71	63.3145	0.84416	19.5942	0.738856	0.166917	0.62123	2.10811	6.88445	5.67254	0.0549941
DC-03_tr2 082	4005.09	62.9589	0.802799	19.6614	0.772434	0.181381	0.612237	2.04785	7.16244	5.71987	0.0807036
DC-03_tr2 083	4054.57	62.9518	0.810073	19.4793	0.673647	0.165509	0.611039	2.06002	7.64429	5.51359	0.0906813
DC-03_tr2 084	4104.04	62.8731	0.758253	19.6089	0.762771	0.148598	0.612968	2.08841	7.52028	5.50215	0.124501
DC-03_tr2 085	4153.42	62.8533	0.850767	19.3962	0.683562	0.227585	0.638731	2.01938	7.61308	5.62398	0.0933965
DC-03_tr2 086	4202.9	62.6758	0.821655	19.4998	0.766273	0.18713	0.573595	2.06801	7.74746	5.5584	0.101887
DC-03_tr2 087	4252.37	62.6295	0.841073	19.6638	0.760093	0.153041	0.635716	1.99444	7.66707	5.58243	0.0728623
DC-03_tr2 088	4301.75	62.7723	0.826867	19.5622	0.780678	0.10083	0.603773	2.06289	7.63773	5.56477	0.0879496
DC-03_tr2 089	4351.23	62.6905	0.833518	19.5914	0.764681	0.149383	0.630539	2.0086	7.73159	5.50094	0.098815
DC-03_tr2 090	4400.7	62.3524	0.818644	19.8326	0.79791	0.194019	0.641253	2.05337	7.64255	5.56914	0.0981612
DC-03_tr2 091	4450.18	62.7101	0.846988	19.5165	0.707398	0.172855	0.616549	2.06019	7.66792	5.64793	0.0535649
DC-03_tr2 092	4499.56	63.1783	0.811616	19.0814	0.789754	0.111224	0.608208	1.97464	7.73735	5.61159	0.0959109
DC-03_tr2 093	4549.04	62.5928	0.817153	19.6953	0.743095	0.162386	0.62211	1.98963	7.67714	5.57698	0.123397
DC-03_tr2 094	4598.52	62.9217	0.803023	19.4703	0.732898	0.148689	0.604904	1.98922	7.73586	5.50552	0.0879075
DC-03_tr2 095	4647.89	62.7698	0.796872	19.3671	0.740447	0.157728	0.610731	2.00799	7.82113	5.61234	0.115861
DC-03_tr2 096	4697.37	62.5622	0.789888	19.6313	0.718841	0.204174	0.628847	2.00546	7.77997	5.59311	0.0861642
DC-03_tr2 097	4746.85	62.93	0.816986	19.6016	0.693736	0.169118	0.600796	2.00734	7.56766	5.51014	0.102575
DC-03_tr2 100	4895.18	62.5499	0.811083	19.743	0.803692	0.170498	0.620841	1.92368	7.70483	5.55841	0.114104
DC-03_tr2 101	4944.56	62.945	0.80076	19.4657	0.71081	0.136947	0.608731	1.92029	7.73169	5.59916	0.0809553
DC-03_tr2 102	4994.04	62.6485	0.752146	19.5821	0.733343	0.176107	0.62689	1.99157	7.72365	5.6411	0.124549
DC-03_tr2 103	5043.51	62.8664	0.756076	19.5061	0.662337	0.147332	0.588216	1.96173	7.77614	5.64251	0.0931317
DC-03_tr2 104	5092.89	62.8351	0.773681	19.4482	0.710573	0.131071	0.618035	1.99236	7.76716	5.60287	0.120957
DC-03_tr2 105	5142.37	62.9158	0.82125	19.3401	0.677307	0.171845	0.613243	1.90379	7.8267	5.61065	0.119264
DC-03_tr2 106	5191.85	62.6092	0.766792	19.6133	0.718918	0.126186	0.629922	1.97544	7.89167	5.58363	0.0849639
DC-03_tr2 107	5241.22	62.897	0.807277	19.3545	0.74219	0.141273	0.597486	1.94756	7.75995	5.65094	0.101919
DC-03_tr2 108	5290.7	62.7676	0.785983	19.4831	0.709604	0.158508	0.623035	1.98766	7.75893	5.64011	0.0854592
DC-03_tr2 110	5389.56	62.659	0.739499	19.671	0.693469	0.164982	0.599697	1.98422	7.80594	5.60013	0.0820882
DC-03_tr2 111	5439.04	62.4147	0.808598	19.6351	0.847122	0.16297	0.625962	1.93628	7.72494	5.73824	0.106092
DC-03_tr2 112	5488.52	62.7491	0.815226	19.5168	0.719802	0.220481	0.598864	1.89844	7.79467	5.58484	0.101753
DC-03_tr2 113	5537.99	62.9137	0.760964	19.5671	0.610246	0.127585	0.651664	1.93953	7.72783	5.64688	0.0545494
DC-03_tr2 114	5587.37	62.7167	0.783959	19.5685	0.711453	0.122367	0.61031	1.97005	7.88021	5.55474	0.0816455
DC-03_tr2 115	5636.85	62.5124	0.774035	19.8447	0.726704	0.137981	0.630539	1.87517	7.71127	5.69571	0.0914522
DC-03_tr2 116	5686.32	62.6101	0.831788	19.7753	0.679331	0.170636	0.609228	1.85802	7.76349	5.62426	0.0778358
DC-03_tr2 117	5735.7	62.9591	0.842014	19.4334	0.691741	0.141784	0.622921	1.95042	7.62987	5.60871	0.120057
DC-03_tr2 118	5785.18	62.6424	0.809891	19.6154	0.699327	0.181453	0.621893	1.95348	7.7938	5.58858	0.0937471
DC-03_tr2 119	5834.65	62.7255	0.840842	19.494	0.694587	0.182441	0.613647	1.91513	7.76131	5.65467	0.117932
DC-03_tr2 120	5884.03	62.8752	0.762711	19.4924	0.739559	0.178343	0.615608	1.92093	7.77472	5.58081	0.0597511
DC-03_tr2 121	5933.51	62.679	0.819046	19.4365	0.719202	0.159108	0.616947	1.94868	7.93533	5.615	0.0711166
DC-03_tr2 122	5982.99	62.8438	0.824324	19.3553	0.723592	0.158149	0.654408	1.91727	7.80095	5.64022	0.0819658
DC-03_tr2 123	6032.37	62.8025	0.750477	19.6611	0.633278	0.1369	0.622367	1.92974	7.74928	5.59726	0.117098
DC-03_tr2 124	6081.84	62.8274	0.817362	19.7054	0.668613	0.172246	0.618089	1.906	7.67443	5.55665	0.0537512
DC-03_tr2 125	6131.32	62.9151	0.793664	19.6648	0.624705	0.129852	0.628949	1.83915	7.76081	5.56798	0.0749808
DC-03_tr2 126	6180.7	63.1017	0.808958	19.3988	0.613758	0.129696	0.585901	1.84703	7.80193	5.61173	0.100426
DC-03_tr2 127	6230.18	62.6583	0.826572	19.7075	0.657219	0.198783	0.625077	1.84821	7.8348	5.57476	0.0687052
DC-03_tr2 128	6279.66	62.6904	0.82983	19.6445	0.59531	0.175079	0.664269	1.81256	7.86794	5.67059	0.0495164
DC-03_tr2 129	6329.03	62.4607	0.863027	19.7727	0.588647	0.163983	0.627427	1.85337	7.91712	5.71121	0.0419023
DC-03_tr2 130	6378.51	63.0513	0.791297	19.5224	0.573552	0.0919056	0.604355	1.80781	7.77663	5.66583	0.114933
DC-03_tr2 131	6427.99	63.0474	0.801436	19.5877	0.481388	0.0944951	0.637968	1.76229	7.73786	5.76288	0.0865952
DC-03_tr2 132	6477.46	63.0325	0.806747	19.6249	0.525625	0.101261	0.605743	1.71971	7.82974	5.66493	0.088818
DC-03_tr2 133	6526.84	63.2929	0.863452	19.4088	0.473562	0.144632	0.582263	1.62497	7.82204	5.69243	0.0949747
DC-03_tr2 134	6576.32	63.2999	0.813813	19.4761	0.472298	0.131087	0.577714	1.67776	7.85311	5.60936	0.0888402
DC-03_tr2 135	6625.8	63.3314	0.759836	19.6285	0.339139	0.122792	0.567079	1.61303	7.85342	5.71616	0.0686544
DC-03_tr2 136	6675.17	63.2392	0.770129	19.7071	0.382072	0.102745	0.580969	1.65325	7.7591	5.74072	0.0647099
DC-03_tr2 137	6724.65	63.3	0.841397	19.3997	0.320252	0.129602	0.588177	1.64284	7.89982	5.7905	0.0877195
DC-03_tr2 138	6774.13	63.1316	0.786004	19.6222	0.327611	0.0896525	0.611967	1.63097	7.9421	5.7641	0.0938059
DC-03_tr2 139	6823.51	63.287	0.824287	19.5692	0.318216	0.084057	0.560617	1.65875	7.81547	5.79036	0.0920963
DC-03_tr2 140	6872.99	63.3198	0.839706	19.4963	0.392255	0.0916577	0.608891	1.54957	7.80863	5.8033	0.089936

## Sheet: DC-04
Experiment	DC-04
Label	Distance (µm)	SiO2	TiO2	Al2O3	FeO	MnO	MgO	CaO	Na2O	K2O	P2O5
Transect 1
DC-04_tr1 001	0	50.4117	3.54377	16.244	5.7868	0.184153	5.09034	9.42275	5.96092	2.55029	0.805236
DC-04_tr1 002	28.2454	50.2292	3.56359	16.2364	5.99752	0.179104	5.18621	9.35572	5.99752	2.53662	0.718059
DC-04_tr1 003	56.3853	49.8518	3.6123	16.4149	5.72204	0.204697	5.18689	9.42696	6.16457	2.5214	0.894532
DC-04_tr1 004	84.6306	50.0562	3.53085	16.334	6.0178	0.192508	5.23999	9.3235	5.92569	2.50742	0.871967
DC-04_tr1 005	112.776	50.2024	3.52695	16.191	6.05357	0.174182	5.23887	9.46709	5.89888	2.43381	0.813262
DC-04_tr1 006	141.016	50.1869	3.61855	16.2732	5.88015	0.199946	5.20167	9.46787	5.89043	2.45692	0.824352
DC-04_tr1 007	169.161	50.1032	3.60374	16.2219	5.83169	0.209448	5.2054	9.5997	6.00623	2.47436	0.744259
DC-04_tr1 008	197.407	50.078	3.56745	16.2232	5.83952	0.202121	5.22267	9.52006	6.0657	2.48796	0.793373
DC-04_tr1 009	225.646	50.0569	3.60844	16.4533	5.90472	0.147106	5.21789	9.3594	5.99699	2.4398	0.815488
DC-04_tr1 010	253.792	49.8856	3.6017	16.3733	5.94074	0.237526	5.20591	9.43894	6.09598	2.48393	0.736382
DC-04_tr1 011	282.037	50.2361	3.61033	16.3853	5.60578	0.204483	5.22521	9.36012	6.00693	2.53032	0.835416
DC-04_tr1 012	310.183	50.0229	3.62008	16.6194	5.69751	0.222964	5.18329	9.32787	6.00604	2.52994	0.769986
DC-04_tr1 013	338.423	50.093	3.55902	16.4207	5.73341	0.225644	5.15904	9.42577	5.97957	2.52311	0.88073
DC-04_tr1 014	366.668	50.126	3.57526	16.3057	5.88988	0.183413	5.19756	9.34114	6.02421	2.50061	0.856306
DC-04_tr1 015	394.813	50.1789	3.49918	16.2645	5.90038	0.238786	5.19233	9.32773	6.06456	2.5346	0.799065
DC-04_tr1 016	423.053	50.0993	3.64136	16.4372	5.8098	0.193728	5.15518	9.31819	6.01437	2.45485	0.875971
DC-04_tr1 017	451.199	50.2013	3.5146	16.4837	5.78573	0.184568	5.0972	9.44421	5.98099	2.51777	0.789963
DC-04_tr1 018	479.444	49.9799	3.54936	16.1991	6.1082	0.18304	5.16927	9.36866	6.04629	2.55884	0.837298
DC-04_tr1 019	507.584	49.9047	3.54997	16.5289	6.00211	0.212588	5.07871	9.29558	6.11497	2.50344	0.809003
DC-04_tr1 020	535.829	50.103	3.61918	16.3891	5.7475	0.175921	5.1306	9.40781	6.04568	2.56016	0.820999
DC-04_tr1 021	564.075	49.9718	3.53584	16.5857	6.09064	0.248531	5.08916	9.18705	5.99867	2.54458	0.747943
DC-04_tr1 022	592.215	50.0132	3.58407	16.4765	5.82668	0.220062	5.18154	9.2469	6.10316	2.57029	0.777641
DC-04_tr1 023	620.46	50.1813	3.48882	16.3326	5.91761	0.245143	5.11487	9.29322	6.06169	2.58317	0.781536
DC-04_tr1 024	648.605	50.3169	3.56326	16.2349	5.89426	0.164813	5.18572	9.17	6.08937	2.57746	0.803325
DC-04_tr1 025	676.845	50.3203	3.59652	16.4014	5.70482	0.149442	5.17775	9.28068	6.09755	2.54237	0.729225
DC-04_tr1 026	705.091	50.2815	3.53574	16.4967	5.85863	0.202071	5.09804	9.13741	6.10531	2.53874	0.745897
DC-04_tr1 027	733.236	50.1472	3.57309	16.461	5.72107	0.237104	5.14277	9.26318	6.02055	2.60236	0.831724
DC-04_tr1 028	761.476	50.3601	3.47028	16.4171	5.81118	0.210784	5.10275	9.11718	6.10892	2.62838	0.773318
DC-04_tr1 029	789.621	50.4029	3.50148	16.5348	5.80508	0.188281	4.99626	9.24513	6.08152	2.52885	0.715756
DC-04_tr1 030	817.867	50.4652	3.47398	16.4346	5.82765	0.17041	5.07735	9.22968	6.0846	2.55923	0.677323
DC-04_tr1 031	846.012	50.7389	3.4347	16.1451	5.87189	0.24372	5.00808	9.03922	6.15983	2.64287	0.715631
DC-04_tr1 032	874.252	50.6445	3.47106	16.3768	5.67523	0.170772	5.05724	9.20808	6.07692	2.56467	0.754775
DC-04_tr1 033	902.497	50.2593	3.50075	16.5313	5.82434	0.208817	5.07711	8.96683	6.19284	2.59997	0.838747
DC-04_tr1 034	930.643	50.227	3.59792	16.4579	5.67444	0.187914	5.08849	9.26209	6.03423	2.62135	0.848596
DC-04_tr1 035	958.883	50.4911	3.47758	16.725	5.76197	0.184281	4.9971	8.98459	6.01692	2.65152	0.709895
DC-04_tr1 036	987.028	50.3538	3.55439	16.3318	5.87291	0.233282	5.03538	9.18216	6.22018	2.5228	0.69331
DC-04_tr1 037	1015.27	50.7537	3.51332	16.3784	5.62336	0.22432	5.00879	9.06499	6.07405	2.64267	0.71639
DC-04_tr1 038	1043.51	50.3476	3.59772	16.5434	5.82196	0.166664	4.94046	9.06093	6.0987	2.64448	0.778072
DC-04_tr1 039	1071.66	50.4744	3.54189	16.4131	5.8385	0.219148	5.01172	9.06396	6.09368	2.63345	0.710112
DC-04_tr1 040	1099.9	50.6292	3.53777	16.4445	5.6666	0.26451	4.93642	9.03982	6.14996	2.63276	0.698504
DC-04_tr1 041	1128.04	50.8748	3.4871	16.4129	5.51186	0.223133	4.9392	8.98873	6.05384	2.66901	0.83946
DC-04_tr1 042	1156.29	50.9961	3.60516	16.1257	5.55667	0.206347	5.06366	8.95641	6.17294	2.62941	0.687651
DC-04_tr1 043	1184.43	50.6569	3.52441	16.3993	5.67193	0.190092	4.93212	9.01139	6.20625	2.60991	0.797667
DC-04_tr1 044	1212.67	50.793	3.51321	16.3882	5.73585	0.234043	4.9062	8.75742	6.26847	2.70405	0.699569
DC-04_tr1 045	1240.92	50.6112	3.52337	16.4869	5.61891	0.219517	4.91012	8.8752	6.26606	2.73241	0.756241
DC-04_tr1 046	1269.07	50.8734	3.47213	16.531	5.47961	0.17207	4.83435	8.97223	6.19657	2.68347	0.785172
DC-04_tr1 047	1297.31	51.1325	3.47304	16.3817	5.61423	0.182975	4.8561	8.72869	6.13672	2.69442	0.799618
DC-04_tr1 048	1325.45	50.841	3.42426	16.5062	5.63875	0.184131	4.91084	8.7862	6.21288	2.80912	0.686595
DC-04_tr1 049	1353.7	51.1165	3.44143	16.2901	5.56398	0.243167	4.90455	8.80964	6.20281	2.68926	0.738567
DC-04_tr1 050	1381.94	50.8429	3.57962	16.4519	5.68226	0.205854	4.913	8.68749	6.19509	2.71805	0.723923
DC-04_tr1 051	1410.08	50.9975	3.57013	16.3631	5.47831	0.255244	4.82173	8.7817	6.23747	2.72889	0.765937
DC-04_tr1 052	1438.33	50.9559	3.51137	16.7457	5.33892	0.188916	4.8153	8.66548	6.26297	2.73107	0.784308
DC-04_tr1 053	1466.47	51.0268	3.47373	16.6081	5.43669	0.221579	4.72756	8.75626	6.23832	2.73376	0.77717
DC-04_tr1 054	1494.71	51.2904	3.45778	16.4348	5.71152	0.191207	4.72358	8.57242	6.14374	2.75799	0.716564
DC-04_tr1 055	1522.86	51.2133	3.46256	16.4957	5.61773	0.218274	4.68825	8.56959	6.22036	2.73737	0.776881
DC-04_tr1 056	1551.1	50.9983	3.4706	16.6115	5.52001	0.182799	4.71672	8.49628	6.37479	2.85269	0.776303
DC-04_tr1 057	1579.34	51.7139	3.40088	16.3036	5.28682	0.18746	4.64786	8.40944	6.37922	2.79284	0.877942
DC-04_tr1 058	1607.49	51.4838	3.35519	16.4486	5.46242	0.222077	4.59293	8.38798	6.36259	2.90511	0.779264
DC-04_tr1 059	1635.73	51.6159	3.33006	16.5681	5.28287	0.203298	4.57369	8.3457	6.42372	2.92922	0.727474
DC-04_tr1 060	1663.87	52.2048	3.27499	16.837	4.86629	0.166214	4.41457	8.23368	6.34466	2.92593	0.731894
DC-04_tr1 061	1692.12	52.0686	3.215	16.786	5.16255	0.202793	4.37941	8.10964	6.37848	3.02952	0.667938
DC-04_tr1 062	1720.36	52.4639	3.19079	16.6596	5.01117	0.166494	4.26461	8.01788	6.46339	3.07829	0.683872
DC-04_tr1 063	1748.5	52.8148	3.07051	16.6875	4.79574	0.151061	4.25147	7.69168	6.59286	3.18347	0.760849
DC-04_tr1 064	1776.75	53.0378	2.92615	16.7107	5.02646	0.15844	3.9967	7.55498	6.67815	3.31359	0.597058
DC-04_tr1 065	1804.89	53.7314	2.84947	16.8824	4.66741	0.192518	3.90143	7.19006	6.516	3.38056	0.688775
DC-04_tr1 066	1833.13	54.3195	2.64102	17.08	4.49688	0.210874	3.64033	6.8218	6.8116	3.42619	0.551862
DC-04_tr1 067	1861.28	55.3547	2.45068	16.8791	4.25806	0.171956	3.44116	6.26966	7.01507	3.70665	0.452967
DC-04_tr1 068	1889.53	56.3814	2.09084	17.1755	3.94711	0.159822	3.05977	5.97676	7.04768	3.80432	0.356769
DC-04_tr1 069	1917.77	57.2752	1.79751	17.5462	3.60523	0.209369	2.76776	5.35168	7.17983	4.0444	0.22285
DC-04_tr1 070	1945.91	58.9505	1.45508	17.509	3.08444	0.165216	2.47366	4.79463	7.18685	4.24492	0.135695
DC-04_tr1 071	1974.16	60.2785	1.24724	17.4335	2.66953	0.119823	2.1397	4.2794	7.19347	4.53413	0.104744
DC-04_tr1 072	2002.3	61.2411	0.993602	17.5527	2.45372	0.116475	1.86319	3.75693	7.36115	4.61217	0.0489725
DC-04_tr1 073	2030.54	62.0959	0.86299	17.7286	2.12094	0.144407	1.5557	3.36915	7.20512	4.85077	0.0663682
DC-04_tr1 074	2058.79	62.3164	0.778853	18.0636	1.82265	0.104573	1.312	3.05473	7.39244	5.08103	0.0737207
DC-04_tr1 075	2086.93	62.9263	0.80177	18.0561	1.5701	0.123365	1.11977	2.73238	7.43248	5.11811	0.119593
DC-04_tr1 076	2115.17	63.268	0.748499	18.3845	1.27004	0.137274	0.916075	2.58278	7.35178	5.26725	0.0737212
DC-04_tr1 077	2143.32	63.679	0.805794	18.2114	1.12602	0.127439	0.830794	2.42887	7.40855	5.30489	0.0772359
DC-04_tr1 079	2199.7	63.9337	0.783842	18.0887	0.87214	0.160856	0.733255	2.33007	7.62381	5.39594	0.0776689
DC-04_tr1 080	2227.95	64.176	0.779737	18.204	0.805119	0.0990915	0.665517	2.20316	7.5537	5.4013	0.112392
DC-04_tr1 081	2256.19	63.7016	0.802839	18.5656	0.862032	0.132392	0.646217	2.1469	7.59594	5.48993	0.0565351
DC-04_tr1 082	2284.33	63.8653	0.763815	18.5093	0.767689	0.14626	0.656388	2.1302	7.61369	5.4733	0.0739965
DC-04_tr1 083	2312.58	63.8903	0.807785	18.4244	0.718461	0.175393	0.64165	2.14663	7.59969	5.49375	0.10194
DC-04_tr1 084	2340.72	64.0725	0.756795	18.2948	0.733012	0.160181	0.659324	2.09374	7.65333	5.48844	0.0879167
DC-04_tr1 085	2368.96	64.1905	0.813243	18.1152	0.711524	0.158764	0.650288	2.10595	7.72862	5.46933	0.0565334
DC-04_tr1 086	2397.21	63.9275	0.811619	18.5507	0.682947	0.187956	0.646213	2.07139	7.56109	5.4795	0.081121
DC-04_tr1 087	2425.35	63.9365	0.771225	18.3377	0.696811	0.14341	0.66216	2.14655	7.72758	5.46859	0.109474
DC-04_tr1 088	2453.59	64.0412	0.815503	18.2497	0.724711	0.1195	0.618297	2.03901	7.69955	5.54895	0.143644
DC-04_tr1 089	2481.74	64.0564	0.809268	18.379	0.738627	0.126604	0.594693	1.95717	7.78789	5.50453	0.0457692
DC-04_tr1 090	2509.99	63.7547	0.830088	18.5496	0.683283	0.144354	0.603348	2.0622	7.72816	5.58428	0.0599264
DC-04_tr1 091	2538.13	64.2341	0.820797	18.2127	0.607567	0.131038	0.639995	2.0395	7.7501	5.47606	0.0881064
DC-04_tr1 092	2566.37	64.0722	0.731934	18.1611	0.762541	0.176526	0.619571	2.02355	7.87048	5.5012	0.0809419
DC-04_tr1 093	2594.62	63.9672	0.808682	18.2967	0.788205	0.136308	0.583131	1.99675	7.82398	5.52161	0.0774248
DC-04_tr1 094	2622.76	63.9837	0.752217	18.3609	0.727933	0.143676	0.614434	1.97123	7.74267	5.61902	0.0842345
DC-04_tr1 095	2651	63.7532	0.821424	18.5211	0.751906	0.142384	0.607797	2.03986	7.78394	5.48022	0.0981365
DC-04_tr1 096	2679.15	63.8924	0.791204	18.3712	0.624072	0.163266	0.63689	2.02429	7.92424	5.53375	0.0386549
DC-04_tr1 097	2707.39	64.042	0.846811	18.2803	0.672243	0.118649	0.616019	1.99273	7.7371	5.58169	0.112447
DC-04_tr1 098	2735.63	64.0553	0.804636	18.4113	0.69781	0.172278	0.601302	1.96253	7.68825	5.54364	0.0629223
DC-04_tr1 100	2792.02	63.7529	0.781365	18.3381	0.766613	0.157769	0.648184	1.99772	7.96015	5.49117	0.106033
DC-04_tr1 101	2820.16	63.7844	0.787524	18.5545	0.598106	0.139592	0.642939	1.97671	7.91701	5.54293	0.0562444
DC-04_tr1 102	2848.41	63.7845	0.781503	18.5257	0.577589	0.151611	0.634685	1.98817	7.97307	5.5057	0.0774876
DC-04_tr1 103	2876.55	63.9478	0.794838	18.18	0.63917	0.182005	0.646549	1.98812	7.95248	5.61593	0.0530849
DC-04_tr1 104	2904.79	63.7834	0.786703	18.3425	0.685869	0.140964	0.630335	1.93559	7.94506	5.64464	0.104887
DC-04_tr1 105	2933.04	63.9206	0.858665	18.1013	0.65899	0.106874	0.630435	1.98859	8.08695	5.60886	0.0387521
DC-04_tr1 106	2961.18	63.8573	0.790629	18.4137	0.718522	0.138408	0.624722	2.01655	7.76065	5.58115	0.098383
DC-04_tr1 108	3017.57	63.9321	0.768865	18.2693	0.693085	0.196108	0.623141	1.93548	7.92623	5.57089	0.0847923
DC-04_tr1 109	3045.81	63.6347	0.734434	18.3863	0.775135	0.136956	0.622611	1.88238	8.03828	5.69802	0.0911684
DC-04_tr1 110	3074.05	63.5588	0.785211	18.5179	0.773188	0.147259	0.623873	1.94222	7.98468	5.63141	0.0354532
DC-04_tr1 111	3102.2	63.7859	0.781447	18.1939	0.713028	0.178359	0.656575	1.98404	8.12025	5.51236	0.0741459
DC-04_tr1 112	3130.45	63.6717	0.742532	18.327	0.675445	0.151149	0.648102	2.04311	7.99963	5.69224	0.0490955
DC-04_tr1 113	3158.59	63.6418	0.821655	18.5134	0.676053	0.136155	0.634775	1.87907	7.99887	5.61666	0.0815289
DC-04_tr1 114	3186.83	63.7194	0.832519	18.5467	0.633841	0.159858	0.613414	1.93089	7.99796	5.47764	0.0877032
DC-04_tr1 115	3214.98	63.4877	0.797254	18.6968	0.664853	0.164105	0.633048	1.90016	8.01725	5.55822	0.0806806
DC-04_tr1 116	3243.22	63.4238	0.740742	18.6026	0.724451	0.16332	0.666821	1.9244	7.92161	5.69175	0.140512
DC-04_tr1 117	3271.46	63.6177	0.80991	18.4916	0.623673	0.154419	0.651527	1.90101	8.10215	5.57087	0.0771585
DC-04_tr1 118	3299.61	63.6014	0.754089	18.5109	0.72699	0.101367	0.609119	1.88471	8.06861	5.63376	0.109008
DC-04_tr1 119	3327.85	63.7661	0.757279	18.5226	0.74253	0.0870693	0.631252	1.89193	7.9644	5.58423	0.0526891
DC-04_tr1 120	3355.99	63.6379	0.830214	18.4605	0.669852	0.162797	0.60879	1.89676	7.99278	5.65986	0.0805364
DC-04_tr1 121	3384.24	63.6879	0.807399	18.518	0.646754	0.146902	0.610207	1.88335	8.01189	5.5788	0.108827
DC-04_tr1 122	3412.48	63.4707	0.852967	18.582	0.747436	0.15926	0.608046	1.8653	8.07957	5.58575	0.048964
DC-04_tr1 123	3440.62	63.8287	0.824837	18.451	0.568829	0.165743	0.604833	1.93791	7.97604	5.58935	0.0527316
DC-04_tr1 124	3468.87	63.6919	0.823134	18.3988	0.757721	0.130016	0.633172	1.9543	7.91845	5.64012	0.0524521
DC-04_tr1 125	3497.01	63.6083	0.8299	18.4933	0.727988	0.123254	0.602282	1.88915	8.02635	5.65725	0.0422762
DC-04_tr1 126	3525.25	63.7074	0.766419	18.4721	0.664813	0.16633	0.599886	1.8594	8.10822	5.57821	0.0772211
DC-04_tr1 127	3553.4	63.9499	0.829336	18.5185	0.68046	0.121164	0.616439	1.86095	7.75732	5.60307	0.0629082
DC-04_tr1 128	3581.64	63.6489	0.778065	18.4494	0.675165	0.170659	0.599832	1.86816	8.08865	5.65498	0.0662441
DC-04_tr1 129	3609.88	63.876	0.762643	18.3342	0.676644	0.132087	0.633797	1.91446	8.05288	5.55091	0.0663476
DC-04_tr1 130	3638.03	63.5152	0.821449	18.6195	0.702896	0.151917	0.59195	1.94714	8.04208	5.51689	0.0909678
DC-04_tr1 131	3666.27	63.8915	0.783795	18.3258	0.607746	0.170364	0.647849	1.90872	8.01055	5.59419	0.0594953
DC-04_tr1 132	3694.42	63.8373	0.794505	18.341	0.582189	0.130586	0.623615	1.91349	7.97966	5.70994	0.0877355
DC-04_tr1 133	3722.66	63.9908	0.815815	18.1763	0.65657	0.225791	0.621328	1.91861	7.9572	5.55388	0.0836112
DC-04_tr1 134	3750.9	63.6367	0.771055	18.3647	0.748912	0.15734	0.62692	1.92992	8.12599	5.60694	0.0314882
DC-04_tr1 135	3779.05	63.6813	0.747288	18.4499	0.620068	0.149682	0.618741	1.85827	8.09673	5.70753	0.0704507
DC-04_tr1 136	3807.29	63.6898	0.77248	18.5095	0.625254	0.178716	0.626874	1.89348	7.94857	5.63994	0.11533
DC-04_tr1 137	3835.44	63.6745	0.738374	18.4594	0.651615	0.0953734	0.613158	1.93823	8.11186	5.66087	0.0566087
DC-04_tr1 138	3863.68	64.0071	0.777374	18.2023	0.611779	0.132334	0.659541	1.91656	7.88935	5.70913	0.0945099
DC-04_tr1 139	3891.82	63.7589	0.789332	18.3883	0.723631	0.168627	0.573514	1.85103	7.99401	5.66497	0.0877714
DC-04_tr1 140	3920.07	63.7238	0.806532	18.352	0.689774	0.167363	0.571492	1.93072	8.19031	5.4873	0.0806837
Transect 2
DC-04_tr2 001	0	49.0326	3.63583	17.0455	5.92354	0.239495	5.18821	9.62065	5.8929	2.5124	0.908855
DC-04_tr2 002	49.4386	49.1718	3.64274	16.8722	6.00587	0.2068	5.15968	9.64861	6.07811	2.54888	0.665393
DC-04_tr2 003	98.7776	48.8428	3.53622	17.2008	6.18328	0.203895	5.07949	9.62752	5.98909	2.47331	0.863615
DC-04_tr2 004	148.216	48.5284	3.52041	17.3053	6.27329	0.20181	5.11687	9.56856	6.03791	2.50727	0.940175
DC-04_tr2 005	197.555	48.6711	3.66397	17.1568	6.12377	0.251435	5.15632	9.66423	5.97968	2.50097	0.8317
DC-04_tr2 006	246.994	48.7519	3.54578	17.1362	6.27408	0.188836	5.20115	9.55418	5.99819	2.52394	0.825747
DC-04_tr2 007	296.432	49.0026	3.64423	16.9723	6.22386	0.20852	5.08759	9.62241	5.88605	2.56939	0.782998
DC-04_tr2 008	345.771	49.0904	3.56517	17.1991	6.03099	0.189766	5.1474	9.35985	6.02072	2.52747	0.8691
DC-04_tr2 009	395.218	48.8328	3.69228	17.2272	6.17095	0.193356	5.07046	9.5444	5.87269	2.55066	0.845214
DC-04_tr2 010	444.556	48.7644	3.50897	17.3384	6.10974	0.195161	5.10865	9.54647	6.03749	2.62141	0.76929
DC-04_tr2 011	493.995	49.1875	3.6223	17.078	6.09856	0.234631	5.09578	9.51621	5.77112	2.54789	0.847966
DC-04_tr2 012	543.334	48.931	3.54691	17.1212	6.11254	0.23612	5.08015	9.55723	6.01032	2.55541	0.849111
DC-04_tr2 013	592.773	49.1323	3.68227	16.8408	6.3352	0.24842	4.93445	9.74156	5.62421	2.66354	0.797259
DC-04_tr2 014	642.211	48.9051	3.61468	17.157	6.12968	0.234802	5.17256	9.52036	5.99732	2.52519	0.743301
DC-04_tr2 015	691.55	48.9791	3.69461	16.9524	6.14408	0.176464	5.13367	9.53251	5.91955	2.52091	0.946719
DC-04_tr2 016	740.989	48.8112	3.55862	17.3954	6.0262	0.267355	5.1187	9.49304	5.97521	2.51856	0.835714
DC-04_tr2 017	790.328	48.857	3.5734	17.1893	5.99674	0.251678	5.12392	9.51879	6.01727	2.61844	0.853508
DC-04_tr2 018	839.766	49.1615	3.56405	17.0441	6.08646	0.218949	5.17758	9.49734	5.94349	2.47135	0.835153
DC-04_tr2 019	889.205	49.0791	3.61206	16.9481	6.17315	0.207336	5.13239	9.50972	5.95888	2.52028	0.858936
DC-04_tr2 020	938.544	48.7884	3.58858	17.0534	6.23657	0.240977	5.10172	9.72291	5.9094	2.55597	0.802064
DC-04_tr2 021	987.983	48.8433	3.61688	17.0086	6.23989	0.258817	5.16405	9.6416	5.96324	2.44882	0.814874
DC-04_tr2 022	1037.32	48.7285	3.62503	17.0019	6.32082	0.270294	5.16694	9.65993	5.84089	2.50178	0.883894
DC-04_tr2 023	1086.76	48.5965	3.64602	17.2367	6.30884	0.195001	5.06961	9.49399	6.02208	2.58089	0.850363
DC-04_tr2 024	1136.21	48.8616	3.59486	17.0985	6.11025	0.24329	5.12242	9.48107	6.01859	2.53575	0.933646
DC-04_tr2 025	1185.55	49.1592	3.64332	16.944	6.00378	0.211518	5.16223	9.58552	5.84984	2.55546	0.885173
DC-04_tr2 026	1234.98	49.0591	3.58268	17.0511	6.00535	0.226561	5.13277	9.58802	5.99508	2.52533	0.834076
DC-04_tr2 028	1333.76	49.1825	3.62527	17.1815	5.88464	0.203549	5.16575	9.40721	5.91545	2.54693	0.887215
DC-04_tr2 029	1383.2	48.7913	3.60431	17.1717	6.02084	0.175301	5.27335	9.60467	5.97988	2.51892	0.85971
DC-04_tr2 030	1432.54	49.1594	3.57561	17.3717	5.94212	0.218773	4.95004	9.55906	5.85945	2.58353	0.78033
DC-04_tr2 031	1481.98	49.0162	3.65854	16.9399	6.15905	0.227506	5.09326	9.28469	6.10781	2.61324	0.899775
DC-04_tr2 032	1531.32	49.1802	3.58659	17.1053	5.99808	0.17606	5.14997	9.51314	5.98786	2.55455	0.748279
DC-04_tr2 033	1580.76	49.1096	3.63775	17.0443	5.91645	0.207127	5.09898	9.46223	6.03907	2.63634	0.848228
DC-04_tr2 034	1630.09	48.9887	3.61292	17.0746	6.01132	0.224123	5.10299	9.33847	6.03173	2.62294	0.992225
DC-04_tr2 035	1679.53	49.2874	3.65394	16.8918	6.04227	0.198619	5.0012	9.34919	6.12392	2.55163	0.900013
DC-04_tr2 036	1728.97	49.1474	3.53967	17.1577	5.96746	0.222887	5.13099	9.31331	6.03886	2.5706	0.911134
DC-04_tr2 037	1778.31	49.1668	3.58061	17.2994	5.7392	0.236218	5.05377	9.4528	5.94381	2.63942	0.887888
DC-04_tr2 038	1827.75	49.1294	3.64189	17.2087	5.91162	0.164865	5.07594	9.40907	6.04574	2.57924	0.83361
DC-04_tr2 039	1877.1	49.3163	3.63146	17.0014	5.9024	0.135847	5.23749	9.38042	6.0047	2.53691	0.853138
DC-04_tr2 040	1926.53	49.196	3.62022	17.1884	5.7021	0.250441	5.04575	9.39411	6.09181	2.6562	0.855008
DC-04_tr2 041	1975.97	49.0091	3.61894	17.3484	5.85778	0.185139	5.10128	9.38472	6.09291	2.62731	0.774393
DC-04_tr2 042	2025.31	48.9805	3.6297	17.2411	5.89316	0.267231	4.99593	9.4107	5.96453	2.71208	0.905079
DC-04_tr2 043	2074.75	49.3497	3.6419	17.0535	5.72882	0.17964	5.05364	9.36049	5.97435	2.67004	0.987915
DC-04_tr2 044	2124.09	49.2767	3.55479	17.0589	5.97572	0.209099	5.09724	9.34664	6.18002	2.6048	0.696044
DC-04_tr2 045	2173.53	49.2558	3.55034	17.1498	5.86622	0.19537	5.03984	9.35534	6.08046	2.67295	0.833921
DC-04_tr2 046	2222.97	49.4443	3.54776	17.0251	5.82117	0.205525	5.07696	9.35873	6.09643	2.64043	0.783565
DC-04_tr2 047	2272.31	49.1606	3.54736	17.0909	5.90543	0.200744	5.11599	9.32975	6.13098	2.6964	0.821839
DC-04_tr2 048	2321.74	49.1799	3.54875	17.2412	5.80518	0.214874	4.99491	9.34367	6.11287	2.67695	0.881751
DC-04_tr2 049	2371.08	49.3468	3.57734	17.2019	5.72374	0.211881	5.09004	9.36241	5.98949	2.64723	0.849158
DC-04_tr2 050	2420.52	49.6142	3.59821	17.148	5.76742	0.194509	5.05805	9.20114	5.98331	2.7552	0.679959
DC-04_tr2 051	2469.86	49.4855	3.5537	17.4305	5.52001	0.185775	5.00795	9.1966	6.03207	2.69344	0.894466
DC-04_tr2 052	2519.3	49.5392	3.64078	17.2017	5.48163	0.244321	4.88847	9.22468	6.14638	2.69991	0.933001
DC-04_tr2 053	2568.74	49.8708	3.56	16.928	5.55032	0.206932	4.95528	9.26422	6.08381	2.72899	0.851631
DC-04_tr2 054	2618.08	49.6009	3.51736	17.2903	5.50099	0.243148	5.01019	9.14105	6.09403	2.73004	0.871978
DC-04_tr2 055	2667.52	49.5227	3.45127	17.3891	5.62619	0.224333	4.95227	9.06725	6.15715	2.73651	0.873233
DC-04_tr2 056	2716.86	49.4699	3.66102	17.0335	5.67099	0.189307	4.97366	9.06538	6.22476	2.82011	0.891361
DC-04_tr2 057	2766.3	49.5834	3.49844	17.3178	5.7042	0.180154	4.90397	9.06926	6.18639	2.71873	0.837676
DC-04_tr2 058	2815.74	49.7228	3.52819	17.1794	5.641	0.204512	4.95382	8.91277	6.22561	2.83075	0.801124
DC-04_tr2 059	2865.08	49.8241	3.5618	17.2752	5.42995	0.194103	4.80381	8.93016	6.24085	2.90487	0.835124
DC-04_tr2 060	2914.52	49.9488	3.44723	17.3596	5.54643	0.219182	4.68205	8.8393	6.28733	2.87097	0.799139
DC-04_tr2 061	2963.86	50.3637	3.41919	17.6093	5.40088	0.210593	4.65133	8.5223	6.20177	2.89553	0.72532
DC-04_tr2 062	3013.29	50.4576	3.37	17.672	5.16802	0.286039	4.56183	8.49693	6.21601	2.98985	0.781779
DC-04_tr2 063	3062.73	50.7051	3.29598	17.6534	5.06132	0.237964	4.41845	8.25526	6.47972	3.1021	0.79073
DC-04_tr2 064	3112.07	51.3447	3.11211	17.5094	5.03039	0.220909	4.34675	7.95883	6.43849	3.20394	0.834453
DC-04_tr2 065	3161.51	52.3311	2.94202	17.7547	4.50017	0.255659	4.02862	7.4832	6.59136	3.39307	0.720129
DC-04_tr2 066	3210.85	53.7987	2.53026	17.9873	4.29532	0.193545	3.61174	6.75416	6.75416	3.51992	0.554923
DC-04_tr2 067	3260.29	55.6206	2.05015	18.1541	3.76203	0.169138	3.05473	5.79168	7.06278	4.02855	0.30619
DC-04_tr2 068	3309.73	57.8404	1.43104	18.4614	3.16656	0.147062	2.44596	4.90208	7.11461	4.32357	0.167259
DC-04_tr2 069	3359.07	59.5457	1.0133	18.9302	2.50098	0.127896	1.84015	3.8938	7.31994	4.7478	0.0802144
DC-04_tr2 070	3408.51	61.2703	0.781602	19.0303	1.80565	0.080544	1.40506	3.14467	7.23273	5.16334	0.085819
DC-04_tr2 071	3457.85	62.083	0.795714	19.2657	1.43198	0.0921139	0.99741	2.64053	7.31224	5.26075	0.12055
DC-04_tr2 072	3507.29	62.5405	0.774788	19.2861	1.07467	0.110366	0.793436	2.38163	7.49959	5.422	0.116953
DC-04_tr2 073	3556.63	62.5844	0.788576	19.3932	0.961198	0.117461	0.678355	2.27376	7.51462	5.57734	0.111037
DC-04_tr2 074	3606.07	62.1046	0.850563	19.8861	0.739104	0.157241	0.681445	2.21295	7.6438	5.59327	0.13095
DC-04_tr2 075	3655.51	62.742	0.786987	19.4643	0.753837	0.132702	0.653677	2.16946	7.60325	5.58586	0.107865
DC-04_tr2 076	3704.84	62.6836	0.828533	19.5905	0.747346	0.174669	0.615557	2.21511	7.60048	5.48697	0.0572068
DC-04_tr2 077	3754.28	62.5764	0.834762	19.5692	0.631087	0.157311	0.618191	2.12887	7.71715	5.69063	0.0763527
DC-04_tr2 078	3803.62	62.6801	0.803604	19.4514	0.730114	0.157565	0.646751	2.08662	7.77649	5.60843	0.0589344
DC-04_tr2 079	3853.06	62.5486	0.824978	19.7772	0.668682	0.162365	0.628015	2.10417	7.62763	5.56392	0.0943844
DC-04_tr2 080	3902.5	62.2457	0.794187	19.8087	0.760781	0.173058	0.647384	2.09427	7.81519	5.5779	0.0828512
DC-04_tr2 081	3951.84	62.5343	0.807083	19.3201	0.746298	0.186344	0.612347	2.08755	7.91017	5.72029	0.0755201
DC-04_tr2 082	4001.28	62.637	0.805942	19.3893	0.748252	0.182518	0.633987	1.99073	7.94262	5.60655	0.0630737
DC-04_tr2 083	4050.62	62.7513	0.766303	19.3489	0.751811	0.171752	0.630779	1.97979	7.86815	5.66384	0.0673538
DC-04_tr2 084	4100.06	62.6711	0.836839	19.2881	0.764177	0.169409	0.644162	2.00025	7.87853	5.67418	0.0732744
DC-04_tr2 086	4198.84	62.7065	0.79191	19.339	0.730539	0.143743	0.633284	2.01852	7.90075	5.62738	0.108368
DC-04_tr2 087	4248.28	62.5571	0.807817	19.3929	0.693939	0.139885	0.602409	2.01142	7.99487	5.72949	0.0701964
DC-04_tr2 088	4297.62	62.4997	0.811406	19.5586	0.654774	0.207517	0.614698	1.9273	7.86218	5.74113	0.122674
DC-04_tr2 089	4347.06	62.3986	0.797185	19.4567	0.662736	0.138334	0.621839	2.01418	8.11805	5.71535	0.0769886
DC-04_tr2 090	4396.4	62.4079	0.79511	19.5376	0.716448	0.222177	0.613441	1.98445	7.98895	5.64648	0.0873568
DC-04_tr2 091	4445.83	62.4625	0.797705	19.4178	0.713213	0.14676	0.636095	1.95611	8.09073	5.71472	0.0644186
DC-04_tr2 092	4495.27	62.5024	0.820932	19.5806	0.69329	0.14992	0.584964	1.97236	8.08362	5.59006	0.0218697
DC-04_tr2 093	4544.61	62.4647	0.83201	19.3662	0.728533	0.175564	0.615955	1.97343	8.00619	5.68511	0.152353
DC-04_tr2 094	4594.05	62.4286	0.786695	19.3991	0.731707	0.155561	0.61151	1.99306	8.12554	5.64188	0.126329
DC-04_tr2 095	4643.39	62.5549	0.842882	19.2832	0.709817	0.169048	0.648513	1.90679	8.06796	5.73061	0.086318
DC-04_tr2 096	4692.83	62.1942	0.806149	19.746	0.643655	0.15862	0.619087	1.99804	7.96159	5.74947	0.123247
DC-04_tr2 097	4742.27	62.5776	0.808554	19.279	0.669709	0.190338	0.629352	1.94118	8.07124	5.7316	0.10135
DC-04_tr2 098	4791.61	62.5306	0.851385	19.4793	0.673107	0.137658	0.631051	1.88741	7.99071	5.74428	0.0744706
DC-04_tr2 099	4841.05	62.5247	0.843395	19.3372	0.645705	0.106401	0.621649	1.94298	8.05975	5.79808	0.120074
DC-04_tr2 100	4890.39	62.3725	0.838834	19.2687	0.737678	0.166477	0.59946	1.9453	8.25217	5.73352	0.0853884
DC-04_tr2 101	4939.83	62.4868	0.785558	19.5137	0.613215	0.170911	0.592669	1.88084	8.02424	5.82652	0.105491
DC-04_tr2 102	4989.27	62.1594	0.816463	19.5689	0.729889	0.184009	0.622004	1.89542	8.08369	5.81944	0.120794
DC-04_tr2 103	5038.61	62.5256	0.780547	19.4472	0.626075	0.131455	0.633236	1.90278	8.14306	5.70833	0.101686
DC-04_tr2 104	5088.05	62.4888	0.787211	19.3291	0.604174	0.210825	0.599868	1.90727	8.21357	5.73207	0.127151
DC-04_tr2 105	5137.38	62.3024	0.81417	19.5055	0.727547	0.16162	0.616851	1.9238	8.16845	5.70968	0.0699565
DC-04_tr2 106	5186.82	62.0754	0.909647	19.4133	0.775917	0.150343	0.635522	1.96902	8.15298	5.80451	0.113321
DC-04_tr2 107	5236.16	62.2683	0.809724	19.516	0.709523	0.154258	0.655569	1.90124	8.11882	5.76539	0.101228
DC-04_tr2 108	5285.6	62.5282	0.842459	19.667	0.677064	0.127148	0.575346	1.88672	8.0493	5.59862	0.0481933
DC-04_tr2 109	5335.04	61.9911	0.80302	19.6919	0.710238	0.201215	0.650702	1.92316	8.18364	5.69786	0.147203
DC-04_tr2 112	5483.16	62.6752	0.840277	19.0419	1.03358	0.184023	0.590855	1.87737	7.98397	5.65274	0.120069
DC-04_tr2 113	5532.6	62.2377	0.771498	19.6303	0.638037	0.163961	0.609993	1.97531	8.10595	5.77242	0.0947741
DC-04_tr2 114	5582.04	62.4026	0.801131	19.384	0.686141	0.155236	0.655443	1.94046	8.13143	5.79057	0.0529775
DC-04_tr2 115	5631.38	62.1706	0.828432	19.5739	0.728935	0.161963	0.615195	1.88211	8.26092	5.70736	0.0706044
DC-04_tr2 116	5680.82	62.2275	0.796675	19.4174	0.681088	0.185408	0.643069	1.89588	8.22565	5.86091	0.0663556
DC-04_tr2 117	5730.16	62.3631	0.861181	19.4414	0.724857	0.153822	0.625055	1.89226	8.14891	5.65643	0.132967
DC-04_tr2 118	5779.6	62.3197	0.798277	19.4487	0.746284	0.161392	0.627896	1.89993	8.22281	5.71	0.0649653
DC-04_tr2 119	5829.03	62.582	0.796499	19.4273	0.594259	0.119608	0.607741	1.85897	8.24281	5.66885	0.101937
DC-04_tr2 120	5878.37	62.3408	0.851793	19.4035	0.737907	0.153245	0.599588	1.9424	8.13763	5.77608	0.0570452
DC-04_tr2 121	5927.81	62.68	0.794587	19.272	0.631603	0.14173	0.647544	1.95173	8.12368	5.65081	0.106272
DC-04_tr2 122	5977.15	62.6385	0.786929	19.1709	0.758634	0.12579	0.621157	1.90684	8.26295	5.63849	0.0898058
DC-04_tr2 123	6026.59	62.7086	0.804544	19.2595	0.652656	0.172139	0.616449	1.8922	8.05976	5.72775	0.106372
DC-04_tr2 124	6076.03	62.4225	0.832675	19.5275	0.651698	0.164942	0.613399	1.94049	8.07857	5.65806	0.110199
DC-04_tr2 125	6125.37	62.4792	0.84224	19.3185	0.762766	0.162341	0.684834	1.91231	8.0605	5.71638	0.0609678
DC-04_tr2 126	6174.81	62.4264	0.855215	19.4609	0.627847	0.202389	0.627335	1.92459	8.06691	5.71236	0.0960249
DC-04_tr2 127	6224.14	62.5489	0.819377	19.245	0.712015	0.170177	0.611941	1.92964	8.13937	5.78891	0.0345898
DC-04_tr2 128	6273.59	62.6661	0.804681	19.3197	0.576003	0.149307	0.602767	1.90736	8.08065	5.82463	0.0688086
DC-04_tr2 129	6322.93	62.339	0.804866	19.438	0.690573	0.15024	0.642541	1.92537	8.13161	5.77611	0.101696
DC-04_tr2 130	6372.37	62.4388	0.832862	19.3494	0.646082	0.133783	0.656206	1.93184	8.09927	5.7852	0.126551
DC-04_tr2 131	6421.81	62.2121	0.825432	19.4605	0.745439	0.161727	0.617102	1.91532	8.15292	5.79718	0.112256
DC-04_tr2 132	6471.15	62.5588	0.807794	19.3251	0.585431	0.168888	0.611342	1.94077	8.17601	5.78102	0.0448029
DC-04_tr2 133	6520.58	62.2471	0.829343	19.5236	0.696405	0.153327	0.619176	1.94619	8.10396	5.79737	0.083511
DC-04_tr2 134	6569.92	62.46	0.824662	19.3777	0.654682	0.165035	0.641083	1.97795	8.03543	5.74842	0.114968
DC-04_tr2 135	6619.36	62.2325	0.841575	19.5564	0.672993	0.176615	0.631593	1.93608	8.07385	5.76704	0.111324

## Sheet: DC-05
Experiment	DC-05
Label	Distance (µm)	SiO2	TiO2	Al2O3	FeO	MnO	MgO	CaO	Na2O	K2O	P2O5
Transect 1
DC-05_tr1 001	0	48.2527	3.63781	16.8042	9.24955	0.284307	4.76429	7.90604	5.94245	2.32531	0.833389
DC-05_tr1 002	16.8	48.19	3.57348	16.8078	9.33882	0.208487	4.98625	7.91567	5.89	2.41002	0.67948
DC-05_tr1 003	33.6	48.5377	3.50562	16.7375	9.15414	0.251115	4.83713	8.07228	5.71093	2.35095	0.842597
DC-05_tr1 004	50.4	48.2937	3.62047	16.6978	9.21763	0.218268	4.82729	8.03161	5.78442	2.40324	0.905533
DC-05_tr1 005	67.2	48.1373	3.55689	17.0689	9.18777	0.240894	4.82203	7.94338	5.70347	2.46805	0.871283
DC-05_tr1 006	84	48.5706	3.59744	16.6575	9.25644	0.223165	4.82407	7.87519	5.76208	2.38111	0.852459
DC-05_tr1 007	100.8	48.597	3.53073	16.6954	9.32154	0.227883	4.71805	8.00923	5.70749	2.42672	0.765928
DC-05_tr1 008	117.6	48.7322	3.49346	16.7624	9.07055	0.23034	4.78925	7.88879	5.66003	2.51902	0.85398
DC-05_tr1 009	134.5	48.9774	3.51323	16.745	8.94939	0.239274	4.67738	7.87879	5.72719	2.44263	0.849724
DC-05_tr1 010	151.3	48.7063	3.62244	16.7253	8.9526	0.304388	4.88512	7.55537	5.70275	2.722	0.823742
DC-05_tr1 011	168.1	48.9626	3.43927	16.6857	9.09842	0.293901	4.72117	7.88947	5.78422	2.40749	0.717764
DC-05_tr1 012	184.9	48.4295	3.52516	16.6823	9.31058	0.216279	4.80044	7.89015	5.81652	2.42614	0.902857
DC-05_tr1 013	201.7	48.6491	3.56574	16.7228	9.30193	0.254976	4.70264	7.82396	5.86022	2.4185	0.700125
DC-05_tr1 014	218.5	49.0899	3.52285	16.872	8.6869	0.276078	4.59956	7.87152	5.69718	2.55067	0.833357
DC-05_tr1 015	235.3	48.6422	3.53216	16.8218	8.99094	0.280397	4.74407	7.79975	5.84204	2.47562	0.871023
DC-05_tr1 016	252.1	48.5047	3.53194	16.8829	9.14577	0.240918	4.71271	7.76821	5.95562	2.40296	0.854295
DC-05_tr1 017	268.9	48.7372	3.49079	16.8979	9.18521	0.242914	4.68528	7.74359	5.81799	2.45076	0.748307
DC-05_tr1 018	285.7	48.9269	3.52878	16.7953	8.78573	0.256949	4.63605	7.82333	5.85715	2.45255	0.937248
DC-05_tr1 019	302.5	48.9386	3.54658	16.823	8.79923	0.275351	4.6943	7.73422	5.77999	2.41953	0.989216
DC-05_tr1 020	319.3	49.0207	3.47473	16.8431	8.87408	0.226586	4.68152	7.84415	5.78428	2.38237	0.868474
DC-05_tr1 021	336.1	48.6712	3.58783	16.7395	8.93594	0.230182	4.70903	7.89323	5.90871	2.5339	0.790556
DC-05_tr1 022	352.9	48.7599	3.49145	16.7239	8.94206	0.272859	4.75013	7.77094	5.87746	2.55018	0.861042
DC-05_tr1 023	369.7	49.2729	3.46321	16.7976	8.81355	0.219509	4.666	7.73519	5.84805	2.4989	0.685072
DC-05_tr1 024	386.6	49.3337	3.40978	16.8429	8.76654	0.219215	4.58415	7.68489	5.79972	2.50326	0.855845
DC-05_tr1 025	403.4	49.281	3.4339	16.8911	8.86832	0.246663	4.5579	7.5587	5.89846	2.43363	0.830322
DC-05_tr1 026	420.2	49.3165	3.60346	16.7192	8.82692	0.227215	4.48615	7.51846	5.95038	2.54423	0.807404
DC-05_tr1 027	437	48.8069	3.50764	16.9795	8.87775	0.254227	4.55269	7.59472	6.03232	2.55572	0.838523
DC-05_tr1 028	453.8	49.3824	3.50436	16.9723	8.46022	0.272573	4.43747	7.66189	5.88898	2.55051	0.86935
DC-05_tr1 029	470.6	49.2607	3.43269	17.0079	8.64915	0.264349	4.46976	7.54985	5.96314	2.5823	0.820113
DC-05_tr1 030	487.4	49.4345	3.42708	17.0012	8.60898	0.268902	4.43868	7.54576	5.89416	2.52902	0.851711
DC-05_tr1 031	504.2	49.7157	3.52917	16.8192	8.42549	0.230403	4.36642	7.46107	5.89255	2.62833	0.931679
DC-05_tr1 032	521	49.539	3.48459	17.0507	8.52018	0.270392	4.45655	7.39312	5.82143	2.66773	0.796285
DC-05_tr1 033	537.8	49.589	3.34822	17.0738	8.59931	0.294373	4.47123	7.27874	5.82299	2.71393	0.808356
DC-05_tr1 034	554.6	49.676	3.40261	16.961	8.44929	0.220181	4.41195	7.39834	5.93115	2.68463	0.864804
DC-05_tr1 035	571.4	49.7185	3.37075	16.937	8.36445	0.339156	4.30707	7.39692	6.09648	2.59048	0.879203
DC-05_tr1 036	588.2	49.6629	3.2806	17.1561	8.53161	0.260384	4.33286	7.3246	6.01443	2.61003	0.826545
DC-05_tr1 037	605	50.3306	3.37546	16.9708	8.14264	0.225792	4.34136	7.18712	5.92003	2.63805	0.868167
DC-05_tr1 038	621.8	49.9442	3.25813	17.1361	8.27936	0.254361	4.29949	7.10396	6.1657	2.72198	0.8367
DC-05_tr1 039	638.7	49.8816	3.28878	17.2324	8.19602	0.267667	4.2225	7.29342	6.08995	2.72855	0.799163
DC-05_tr1 040	655.5	50.2444	3.27053	16.982	8.12989	0.251119	4.29192	7.06723	6.11805	2.76499	0.879947
DC-05_tr1 041	672.3	50.2623	3.29792	17.2728	8.02837	0.261154	4.1327	7.09052	6.12176	2.73109	0.801291
DC-05_tr1 042	689.1	50.3549	3.23323	17.3343	7.90576	0.25021	4.19277	7.05052	6.16399	2.77432	0.739992
DC-05_tr1 043	705.9	50.5348	3.16166	17.2238	7.9868	0.261715	4.09156	6.98458	6.02368	2.89302	0.838356
DC-05_tr1 044	722.7	50.5616	3.2065	17.2491	8.05233	0.229816	4.09318	6.9182	6.01089	2.88688	0.79152
DC-05_tr1 045	739.5	50.6763	3.14336	17.2471	8.0652	0.215175	4.05328	6.9278	6.1006	2.80214	0.768986
DC-05_tr1 046	756.3	50.8021	3.08953	17.3529	7.94009	0.215546	4.08848	6.73517	6.08637	2.83207	0.857756
DC-05_tr1 047	773.1	50.6977	3.09802	17.5106	7.84349	0.22857	4.07198	6.83844	6.17532	2.83899	0.696899
DC-05_tr1 048	789.9	50.9309	3.03726	17.3144	7.83076	0.260646	3.9567	6.67371	6.36378	2.82031	0.811485
DC-05_tr1 049	806.7	50.9385	3.02727	17.6179	7.67115	0.235386	3.96429	6.70325	6.18841	2.87282	0.781016
DC-05_tr1 050	823.5	51.4232	3.08333	17.2894	7.56346	0.210866	3.91106	6.63225	6.24942	2.87639	0.760588
DC-05_tr1 051	840.3	51.421	2.9295	17.4945	7.50942	0.240549	3.82692	6.56043	6.28192	2.98107	0.754759
DC-05_tr1 052	857.1	51.4869	2.95247	17.4351	7.5003	0.229567	3.80195	6.48506	6.36075	2.98354	0.76443
DC-05_tr1 053	873.9	51.7893	2.85249	17.2286	7.42061	0.204532	3.71031	6.44911	6.49045	3.02819	0.826396
DC-05_tr1 054	890.8	52.1231	2.8992	17.6247	6.90386	0.237464	3.66051	6.29899	6.42413	3.14949	0.678601
DC-05_tr1 055	907.6	52.0198	2.80433	17.7677	7.11949	0.242352	3.63218	6.2399	6.36407	3.06303	0.747132
DC-05_tr1 056	924.4	52.294	2.82642	17.352	7.2783	0.199092	3.57185	6.10839	6.54322	3.17843	0.648317
DC-05_tr1 057	941.2	52.7323	2.70796	17.685	6.93654	0.207471	3.59325	6.09291	6.34287	3.16623	0.535447
DC-05_tr1 058	958	53.0111	2.66242	17.4915	7.05851	0.21836	3.4983	5.78922	6.51158	3.16807	0.590995
DC-05_tr1 059	974.8	53.2708	2.55245	17.7535	6.68597	0.172058	3.36882	5.92127	6.43796	3.23448	0.602771
DC-05_tr1 060	991.6	53.3739	2.4861	17.5575	6.71558	0.277082	3.30105	5.76652	6.62274	3.31137	0.588206
DC-05_tr1 061	1008.4	53.6227	2.41359	17.7989	6.67588	0.166281	3.29686	5.67964	6.53209	3.34821	0.465771
DC-05_tr1 062	1025.2	53.9209	2.39465	17.7121	6.61625	0.226769	3.18942	5.51182	6.51303	3.35457	0.560472
DC-05_tr1 063	1042	54.1597	2.3431	17.95	6.4203	0.251445	3.1379	5.40874	6.49255	3.39595	0.440338
DC-05_tr1 064	1058.8	54.2046	2.18267	18.0303	6.24801	0.216611	3.09297	5.38942	6.70316	3.43434	0.497979
DC-05_tr1 065	1075.6	54.3992	2.15524	17.988	6.29994	0.244226	3.00491	5.24305	6.71441	3.52299	0.428044
DC-05_tr1 066	1092.4	55.207	2.01561	17.8097	6.13986	0.236395	2.88387	5.06487	6.73937	3.49372	0.409531
DC-05_tr1 067	1109.2	55.3411	1.93399	18.0368	5.92608	0.201466	2.89582	4.9746	6.67072	3.60943	0.409965
DC-05_tr1 068	1126.1	55.9152	1.90209	18.0802	5.58221	0.162918	2.72908	4.87927	6.67798	3.72148	0.349612
DC-05_tr1 069	1142.9	56.2702	1.78636	18.092	5.51485	0.188398	2.65876	4.69438	6.77154	3.70773	0.315728
DC-05_tr1 070	1159.7	56.1921	1.76724	18.2683	5.47639	0.183094	2.64059	4.67497	6.78128	3.7708	0.245153
DC-05_tr1 071	1176.5	56.6003	1.62465	18.2615	5.38559	0.200051	2.55867	4.49831	6.87127	3.7142	0.285478
DC-05_tr1 072	1193.3	56.7612	1.59955	18.1918	5.33528	0.167	2.45527	4.37182	6.92033	3.95743	0.240347
DC-05_tr1 073	1210.1	57.3109	1.56135	18.3851	5.13263	0.153876	2.36101	4.16769	6.84692	3.85974	0.220806
DC-05_tr1 074	1226.9	57.7006	1.4559	18.4067	4.84714	0.16319	2.30472	4.07201	6.91415	4.01	0.125571
DC-05_tr1 075	1243.7	58.1945	1.34307	18.3403	4.65721	0.173306	2.16375	4.00809	7.01673	3.96687	0.13611
DC-05_tr1 076	1260.5	58.0834	1.30765	18.53	4.66612	0.15871	2.07958	3.91085	6.97332	4.11778	0.172574
DC-05_tr1 077	1277.3	58.6658	1.17321	18.3054	4.49932	0.167954	2.06476	3.74943	7.05715	4.1706	0.146382
DC-05_tr1 078	1294.1	58.7685	1.08912	18.7051	4.45604	0.168817	1.91559	3.66727	6.9965	4.09751	0.135525
DC-05_tr1 079	1310.9	59.0307	1.10711	18.4792	4.50686	0.158715	1.84792	3.57264	7.05288	4.14755	0.0965023
DC-05_tr1 080	1327.7	59.5222	1.0539	18.5892	3.95994	0.189072	1.75427	3.3957	7.16072	4.26771	0.107308
DC-05_tr1 081	1344.5	59.6492	1.01674	18.5879	3.95796	0.192096	1.71456	3.27413	7.18028	4.36205	0.0650681
DC-05_tr1 082	1361.3	60.2226	0.929157	18.4595	3.85474	0.163053	1.61404	3.23633	7.06015	4.35977	0.100697
DC-05_tr1 083	1378.2	60.1562	0.900902	18.6521	3.84983	0.159449	1.60643	3.10869	7.09234	4.40569	0.06835
DC-05_tr1 084	1395	60.4247	0.869861	18.5384	3.79006	0.169008	1.53034	3.07943	7.03428	4.4595	0.104433
DC-05_tr1 085	1411.8	60.661	0.82409	18.445	3.73648	0.194978	1.43215	2.87977	7.17363	4.5519	0.100947
DC-05_tr1 086	1428.6	61.0827	0.811521	18.8145	3.24032	0.171069	1.37925	2.84943	7.07728	4.50559	0.0684068
DC-05_tr1 087	1445.4	61.0026	0.812921	18.6915	3.42283	0.123201	1.2816	2.78362	7.15494	4.61875	0.108046
DC-05_tr1 088	1462.2	61.2971	0.779864	18.9083	3.09634	0.138613	1.28488	2.64221	7.14222	4.62386	0.0865942
DC-05_tr1 089	1479	61.1376	0.78305	18.9939	3.15026	0.170545	1.20079	2.67823	7.07013	4.67921	0.136272
DC-05_tr1 090	1495.8	61.8474	0.733322	18.8574	2.99061	0.113498	1.14225	2.54409	7.13385	4.57937	0.0581507
DC-05_tr1 091	1512.6	61.7992	0.738088	18.5671	3.05518	0.113141	1.0785	2.37211	7.62554	4.52068	0.130528
DC-05_tr1 092	1529.4	63.9801	0.760286	17.8957	2.87408	0.140306	1.02731	2.43518	6.18706	4.61552	0.0843819
DC-05_tr1 093	1546.2	61.337	0.771789	18.7661	3.17678	0.157997	1.07358	2.45096	7.40547	4.77568	0.0845738
DC-05_tr1 094	1563	61.5797	0.771891	19.0621	2.86345	0.190621	1.01286	2.35692	7.30852	4.73452	0.119397
DC-05_tr1 095	1579.8	61.709	0.764218	19.0718	2.66094	0.145057	0.936713	2.35032	7.40301	4.89737	0.0616054
DC-05_tr1 096	1596.6	61.9129	0.765495	19.1117	2.67892	0.129738	0.880658	2.31968	7.24644	4.87544	0.0790334
DC-05_tr1 097	1613.4	61.6654	0.804113	19.2076	2.88319	0.157703	0.852645	2.28809	7.17207	4.83268	0.136464
DC-05_tr1 098	1630.3	62.0726	0.761612	19.1025	2.60017	0.180355	0.860646	2.17544	7.29291	4.83777	0.116024
DC-05_tr1 099	1647.1	62.1056	0.813772	19.241	2.6112	0.140083	0.818688	2.07872	7.2704	4.8128	0.107827
DC-05_tr1 100	1663.9	62.2333	0.759885	19.3294	2.49345	0.18567	0.794505	2.06071	7.20217	4.83236	0.108496
DC-05_tr1 101	1680.7	61.9531	0.830252	19.2955	2.54672	0.226946	0.812178	2.04354	7.33209	4.82645	0.133189
DC-05_tr1 102	1697.5	62.1497	0.809633	19.3073	2.48928	0.187519	0.74771	2.0264	7.25183	4.9477	0.0829074
DC-05_tr1 103	1714.3	62.4635	0.783656	18.9237	2.50597	0.186761	0.77654	2.00065	7.30133	4.96037	0.0975574
DC-05_tr1 104	1731.1	62.3163	0.757241	19.3725	2.34071	0.22206	0.734347	2.04299	7.25826	4.87648	0.079153
DC-05_tr1 105	1747.9	62.5367	0.812926	19.1386	2.36905	0.183731	0.695404	1.96559	7.31406	4.89328	0.0906239
DC-05_tr1 106	1764.7	62.4326	0.822773	19.2053	2.34135	0.194837	0.669296	1.99066	7.31285	4.95087	0.0795234
DC-05_tr1 107	1781.5	62.7007	0.783323	19.1292	2.33858	0.127289	0.652855	1.93856	7.30295	4.94385	0.082671
DC-05_tr1 108	1798.3	62.6446	0.771648	19.063	2.3025	0.1842	0.646981	1.91875	7.42608	4.93689	0.105376
DC-05_tr1 109	1815.1	62.2227	0.767855	19.4343	2.37886	0.200135	0.652118	1.9548	7.42619	4.92321	0.0398201
DC-05_tr1 110	1831.9	62.5336	0.776336	19.4187	2.24696	0.167801	0.639251	1.91713	7.36963	4.85468	0.0758608
DC-05_tr1 111	1848.7	62.4221	0.803866	19.1505	2.34096	0.238221	0.632986	1.8872	7.38381	5.04285	0.0975571
DC-05_tr1 112	1865.5	62.6911	0.786984	19.2603	2.14117	0.18972	0.65944	1.86323	7.41175	4.92058	0.0757646
DC-05_tr1 113	1882.4	62.6369	0.79117	19.1958	2.39561	0.159638	0.636695	1.85866	7.2591	4.99773	0.0686672
DC-05_tr1 114	1899.2	62.4603	0.800804	19.3234	2.39477	0.245568	0.641944	1.83737	7.28755	4.96503	0.0433537
DC-05_tr1 115	1916	62.6048	0.728419	19.3436	2.16773	0.198415	0.5996	1.83583	7.40554	5.06149	0.0545562
DC-05_tr1 116	1932.8	62.4716	0.767529	19.381	2.4162	0.207073	0.590375	1.7993	7.33085	4.93522	0.100863
DC-05_tr1 117	1949.6	62.6568	0.75721	19.1437	2.35567	0.251718	0.588096	1.7899	7.45792	4.93766	0.0613092
DC-05_tr1 118	1966.4	62.4615	0.794032	19.271	2.40118	0.205537	0.597525	1.77523	7.40878	4.96655	0.118623
DC-05_tr1 119	1983.2	62.3848	0.828117	19.2604	2.35337	0.22295	0.62261	1.74438	7.36975	5.1196	0.0939282
DC-05_tr1 120	2000	62.5289	0.795738	19.2619	2.3304	0.247579	0.602913	1.78389	7.36241	5.03201	0.0542385
Transect 2
DC-05_tr2 001	0	48.1622	3.52102	16.5561	9.4621	0.24616	5.16209	8.465	5.50485	2.18117	0.739311
DC-05_tr2 002	43.5876	48.2165	3.40242	16.7104	9.30203	0.216111	5.05681	8.49044	5.52503	2.22666	0.853622
DC-05_tr2 003	87.0629	47.9805	3.54987	16.5001	9.63982	0.224339	5.04893	8.52593	5.60067	2.20696	0.722882
DC-05_tr2 004	130.65	47.9354	3.42099	16.5954	9.55589	0.196941	5.07429	8.57846	5.5838	2.246	0.812822
DC-05_tr2 005	174.225	48.39	3.39507	16.3439	9.5952	0.260426	5.0926	8.51872	5.41347	2.20472	0.785833
DC-05_tr2 006	217.713	47.9568	3.52348	16.5157	9.57265	0.234587	5.05137	8.54367	5.55027	2.22426	0.827239
DC-05_tr2 007	261.288	48.0687	3.54409	16.5045	9.42667	0.24632	5.06151	8.59521	5.59156	2.14101	0.820442
DC-05_tr2 008	304.875	48.1079	3.48547	16.4673	9.39199	0.202345	5.07168	8.59889	5.55171	2.25408	0.868655
DC-05_tr2 009	348.351	48.2725	3.44359	16.5749	9.4595	0.209312	5.04092	8.49488	5.4973	2.17817	0.828951
DC-05_tr2 010	391.938	47.6023	3.53493	16.7417	9.76511	0.226609	5.02768	8.53151	5.5771	2.22877	0.764312
DC-05_tr2 011	435.526	47.9531	3.46926	16.7193	9.30013	0.253298	5.13075	8.57911	5.53828	2.23621	0.820501
DC-05_tr2 012	479.001	48.0501	3.40974	16.5466	9.50752	0.188268	5.06231	8.57664	5.59574	2.23829	0.824717
DC-05_tr2 013	522.589	48.2828	3.38406	16.5246	9.25671	0.238446	5.0813	8.56949	5.63316	2.22828	0.801138
DC-05_tr2 014	566.163	48.2585	3.39019	16.4652	9.48839	0.273902	5.05427	8.51681	5.5504	2.2429	0.759485
DC-05_tr2 015	609.651	48.4881	3.35808	16.6021	9.09087	0.264043	5.09465	8.56781	5.52357	2.22826	0.782505
DC-05_tr2 016	653.226	47.7717	3.43052	16.5134	9.63104	0.201357	5.13513	8.56566	5.66782	2.25861	0.824817
DC-05_tr2 017	696.714	47.8679	3.4102	16.3731	9.74045	0.230058	5.24566	8.36385	5.53766	2.39861	0.832423
DC-05_tr2 018	740.289	48.4878	3.3979	16.5205	9.14098	0.254843	5.13854	8.46348	5.618	2.25137	0.726588
DC-05_tr2 019	783.876	48.2644	3.53711	16.2437	9.58443	0.254651	4.99967	8.53678	5.57017	2.2094	0.799636
DC-05_tr2 020	827.365	47.9854	3.4305	16.4664	9.58461	0.230363	5.0314	8.55546	5.62394	2.25581	0.836106
DC-05_tr2 021	870.939	48.4365	3.41893	16.5231	9.33191	0.217502	4.95693	8.58369	5.57005	2.24465	0.716728
DC-05_tr2 022	914.527	47.9828	3.50688	16.5354	9.6257	0.258801	5.0574	8.46021	5.44242	2.25814	0.872245
DC-05_tr2 023	958.002	48.3994	3.38567	16.5116	9.34444	0.297939	5.09413	8.40687	5.52124	2.271	0.767661
DC-05_tr2 024	1001.59	48.1805	3.45555	16.4164	9.68176	0.222691	5.21964	8.31199	5.43756	2.35558	0.718297
DC-05_tr2 025	1045.16	48.214	3.57879	16.6346	9.06767	0.242014	5.06908	8.49044	5.6568	2.27741	0.769282
DC-05_tr2 026	1088.65	48.1611	3.40954	16.6098	9.45705	0.237938	5.09867	8.35181	5.50532	2.23132	0.937468
DC-05_tr2 027	1132.23	48.3835	3.54178	16.497	9.34028	0.210104	5.02536	8.44177	5.56864	2.18358	0.808028
DC-05_tr2 028	1175.81	48.3762	3.46289	16.4905	9.38736	0.303733	5.00659	8.45905	5.46553	2.27383	0.774353
DC-05_tr2 029	1219.3	48.0574	3.38594	16.535	9.68004	0.309512	4.97504	8.37136	5.65015	2.26422	0.771287
DC-05_tr2 030	1262.88	48.2707	3.46431	16.5285	9.31815	0.25231	5.10255	8.24338	5.47819	2.38954	0.952371
DC-05_tr2 031	1306.46	48.0475	3.39036	16.5358	9.4223	0.253861	5.15834	8.37191	5.67834	2.30877	0.832823
DC-05_tr2 032	1349.94	47.9681	3.50457	16.5717	9.66599	0.18567	5.01391	8.38408	5.57216	2.25367	0.88007
DC-05_tr2 033	1393.53	48.3761	3.44577	16.4585	9.53572	0.285551	5.0177	8.29691	5.59026	2.25901	0.734542
DC-05_tr2 034	1437.1	48.1383	3.518	16.7365	9.27377	0.25646	5.0272	8.38907	5.61006	2.22737	0.823295
DC-05_tr2 035	1480.59	47.8338	3.42343	16.8554	9.39087	0.210536	5.04615	8.44864	5.61149	2.33463	0.845074
DC-05_tr2 037	1567.75	48.6715	3.45424	16.5325	9.16622	0.18707	4.94206	8.4067	5.58713	2.26814	0.784487
DC-05_tr2 038	1611.23	48.4031	3.50115	16.4149	9.35025	0.219419	5.05952	8.32172	5.65171	2.3064	0.771811
DC-05_tr2 039	1654.82	48.2181	3.51017	16.6473	9.33621	0.207806	4.98485	8.23539	5.75335	2.26395	0.842856
DC-05_tr2 040	1698.4	48.3401	3.48501	16.4622	9.17824	0.224799	5.00251	8.47705	5.72463	2.28148	0.823948
DC-05_tr2 041	1741.88	47.9602	3.43165	16.671	9.47592	0.274117	4.99715	8.3666	5.68141	2.31196	0.830024
DC-05_tr2 042	1785.47	48.2624	3.4518	16.8197	9.24664	0.297901	5.05218	8.0019	5.61702	2.44764	0.802805
DC-05_tr2 044	1872.53	48.3837	3.46196	16.5463	9.1517	0.225812	4.93669	8.27313	5.81525	2.35329	0.852206
DC-05_tr2 045	1916.1	48.6622	3.45802	16.6651	9.26998	0.198836	4.87455	7.99927	5.72864	2.33312	0.810238
DC-05_tr2 046	1959.59	48.2388	3.47826	16.7579	9.19921	0.254484	4.85918	8.14016	5.80402	2.42959	0.838416
DC-05_tr2 047	2003.17	48.8832	3.43369	16.5962	8.96921	0.238693	4.92162	8.04315	5.75403	2.39318	0.767065
DC-05_tr2 048	2046.75	48.3624	3.49018	16.7112	9.36618	0.271817	4.83416	8.03262	5.77182	2.41708	0.742523
DC-05_tr2 049	2090.24	48.2451	3.54636	16.7022	9.2455	0.281941	4.87755	8.11191	5.69914	2.45437	0.835943
DC-05_tr2 050	2133.82	48.5131	3.54771	16.8646	9.09295	0.2267	4.78576	7.93813	5.79494	2.42409	0.812019
DC-05_tr2 051	2177.4	48.8407	3.48638	16.7639	8.97691	0.222961	4.81204	7.92265	5.76193	2.42168	0.790908
DC-05_tr2 052	2220.88	49.0008	3.43463	16.6007	9.0029	0.317339	4.70441	7.87884	5.76602	2.42506	0.869275
DC-05_tr2 053	2264.47	48.7656	3.49365	16.6572	8.97328	0.228959	4.79338	7.88152	5.87474	2.50586	0.825791
DC-05_tr2 054	2308.04	49.0839	3.49781	16.4689	8.95274	0.225692	4.68457	7.79721	5.97543	2.5609	0.752863
DC-05_tr2 055	2351.53	49.1492	3.52107	16.9282	8.58391	0.235224	4.63573	7.63593	5.94832	2.54184	0.820576
DC-05_tr2 056	2395.1	48.9724	3.50997	16.6933	8.73314	0.241937	4.58594	7.69895	6.00665	2.65337	0.90434
DC-05_tr2 057	2438.69	49.4064	3.41877	16.6173	8.67124	0.28324	4.55836	7.60417	5.98802	2.58998	0.862566
DC-05_tr2 058	2482.18	49.586	3.43239	16.9625	8.54425	0.238168	4.42957	7.4526	5.86761	2.64515	0.841724
DC-05_tr2 059	2525.75	49.727	3.36867	17.0415	8.31216	0.259377	4.44289	7.4361	6.00728	2.64905	0.756021
DC-05_tr2 060	2569.34	49.8649	3.31811	17.0986	8.35748	0.214536	4.27206	7.25836	6.03481	2.73744	0.843629
DC-05_tr2 061	2612.82	50.1372	3.24302	16.9093	8.31994	0.265865	4.31021	7.14914	6.04051	2.88038	0.744443
DC-05_tr2 062	2656.4	50.7587	3.17954	17.0577	7.91261	0.227332	4.13237	7.01156	6.12088	2.76527	0.834034
DC-05_tr2 063	2699.98	51.2906	3.09913	17.0452	7.68585	0.238427	4.04953	6.77677	6.11562	2.95451	0.744308
DC-05_tr2 064	2743.47	51.4367	3.04353	17.1839	7.50946	0.221414	3.90116	6.77734	6.28578	2.88665	0.754084
DC-05_tr2 065	2787.04	51.7225	2.9103	17.265	7.44663	0.247427	3.70778	6.50415	6.45237	3.00351	0.740313
DC-05_tr2 066	2830.63	52.2829	2.67162	17.469	7.23821	0.171066	3.73819	6.37874	6.34767	3.08582	0.61675
DC-05_tr2 067	2874.12	52.5751	2.56186	17.6322	6.98029	0.201007	3.60942	6.05719	6.54467	3.20492	0.633308
DC-05_tr2 068	2917.69	53.4243	2.46224	17.8978	6.53838	0.212083	3.34161	5.76246	6.50734	3.32092	0.532898
DC-05_tr2 069	2961.28	54.2981	2.274	17.7701	6.34867	0.259092	3.12803	5.50493	6.57504	3.39556	0.446465
DC-05_tr2 070	3004.76	55.2174	2.08173	17.705	6.06999	0.210543	2.9474	5.09096	6.72955	3.53482	0.412636
DC-05_tr2 071	3048.34	55.9968	1.84139	17.9897	5.81382	0.160966	2.68967	4.80002	6.80693	3.60002	0.300622
DC-05_tr2 072	3091.82	56.7951	1.65695	18.169	5.3213	0.196495	2.4743	4.56555	6.8328	3.73733	0.251157
DC-05_tr2 073	3135.41	57.7349	1.43359	18.076	4.88062	0.138302	2.35185	4.24582	6.9515	3.99607	0.191374
DC-05_tr2 074	3178.98	58.4208	1.29879	18.3202	4.65472	0.168373	2.05961	3.83087	6.98208	4.15011	0.114411
DC-05_tr2 075	3222.47	59.2941	1.08232	18.3128	4.35575	0.159952	1.84162	3.49702	7.08715	4.29367	0.0756308
DC-05_tr2 076	3266.06	59.9511	0.913203	18.5335	3.99057	0.15448	1.6495	3.28091	7.20977	4.22713	0.0897878
DC-05_tr2 077	3309.63	60.6847	0.835759	18.6126	3.53443	0.147061	1.53727	3.0177	7.1412	4.40254	0.0867072
DC-05_tr2 078	3353.12	61.0901	0.791909	18.5347	3.26475	0.156522	1.35136	2.74818	7.27337	4.66984	0.119225
DC-05_tr2 079	3396.69	61.8023	0.801065	18.695	2.85874	0.183967	1.13784	2.5811	7.19828	4.64803	0.0936804
DC-05_tr2 080	3440.28	61.8667	0.756011	18.8434	2.74067	0.161648	1.06017	2.47177	7.2395	4.7367	0.123382
DC-05_tr2 081	3483.76	62.0992	0.744198	18.9047	2.70806	0.154525	0.933969	2.35663	7.18358	4.80628	0.108839
DC-05_tr2 082	3527.34	62.3325	0.776122	18.8999	2.47919	0.172714	0.837116	2.21986	7.32347	4.8754	0.0837116
DC-05_tr2 083	3570.92	62.4817	0.739463	19.0009	2.45006	0.185047	0.801076	2.06756	7.27781	4.93113	0.0653349
DC-05_tr2 084	3614.41	62.5121	0.791096	19.038	2.4405	0.153359	0.75211	2.02686	7.3422	4.86033	0.0834529
DC-05_tr2 085	3657.99	62.3527	0.763591	19.2601	2.44622	0.170822	0.680193	1.95078	7.25608	4.98533	0.134181
DC-05_tr2 086	3701.57	62.3201	0.697911	19.2949	2.37714	0.249033	0.658086	1.90377	7.40926	4.97038	0.119371
DC-05_tr2 087	3745.06	62.4692	0.790045	19.3411	2.24873	0.230855	0.639855	1.86706	7.35478	4.98227	0.0761266
DC-05_tr2 088	3788.63	62.7273	0.751797	19.0352	2.32515	0.205336	0.629753	1.83945	7.34746	5.02232	0.116257
DC-05_tr2 089	3832.22	62.9335	0.817505	18.9411	2.20221	0.192409	0.6069	1.80933	7.30968	5.10747	0.0799205
DC-05_tr2 090	3875.69	62.7163	0.808868	18.9993	2.20657	0.212887	0.625091	1.83363	7.4381	5.0865	0.0728271
DC-05_tr2 091	3919.28	62.6096	0.824503	19.0326	2.36223	0.201101	0.629929	1.74059	7.56329	4.9524	0.0838179
DC-05_tr2 092	3962.86	62.7442	0.786415	19.1427	2.16359	0.231814	0.620849	1.76178	7.41804	5.06899	0.0616109
DC-05_tr2 093	4006.34	62.7803	0.788799	18.8694	2.27179	0.20415	0.60633	1.73237	7.55189	5.10375	0.0912866
DC-05_tr2 094	4049.93	62.905	0.811727	18.9317	2.20956	0.202906	0.630087	1.7635	7.46893	5.00003	0.0766602
DC-05_tr2 095	4093.51	62.4675	0.809493	19.1717	2.28577	0.244742	0.635383	1.75037	7.53687	5.00399	0.0942109
DC-05_tr2 096	4137	62.6756	0.800175	19.2642	2.24098	0.218445	0.652764	1.71672	7.3603	5.01651	0.054277
DC-05_tr2 097	4180.57	62.4794	0.790916	19.1863	2.2639	0.245721	0.618281	1.67466	7.53598	5.10669	0.0982055
DC-05_tr2 098	4224.16	62.6176	0.770401	19.0311	2.36603	0.156364	0.616918	1.63565	7.62274	5.08183	0.101328
DC-05_tr2 099	4267.63	62.7685	0.864178	19.1614	2.16122	0.237527	0.598524	1.65452	7.46604	5.01527	0.072799
DC-05_tr2 100	4311.22	62.7754	0.772772	19.2076	2.15034	0.227915	0.616639	1.58938	7.521	5.0694	0.0694965
DC-05_tr2 101	4354.7	62.3634	0.787498	19.4136	2.31435	0.19362	0.62911	1.59111	7.50096	5.09363	0.112721
DC-05_tr2 102	4398.28	62.6301	0.81351	19.0928	2.22129	0.199503	0.59603	1.59107	7.64538	5.08314	0.127182
DC-05_tr2 103	4441.87	62.5596	0.8053	19.2133	2.1958	0.237809	0.610474	1.63649	7.49887	5.1477	0.094668
DC-05_tr2 104	4485.35	62.566	0.791753	19.2209	2.24003	0.219358	0.614408	1.64131	7.52526	5.06846	0.112518
DC-05_tr2 105	4528.93	62.6021	0.785825	19.0116	2.29912	0.274245	0.597874	1.56711	7.59844	5.15498	0.10877
DC-05_tr2 106	4572.51	62.8799	0.809045	19.0145	2.3201	0.223658	0.606939	1.59829	7.33152	5.11454	0.101466
DC-05_tr2 107	4616	62.6966	0.814601	19.1251	2.26278	0.181746	0.633992	1.63251	7.56326	5.04218	0.0472187
DC-05_tr2 108	4659.57	62.7823	0.789579	19.0664	2.24372	0.269246	0.631162	1.61756	7.46166	5.0614	0.0770168
DC-05_tr2 109	4703.16	62.6667	0.843363	19.0892	2.21774	0.204778	0.600966	1.60631	7.50301	5.20236	0.0655995
DC-05_tr2 110	4746.63	62.4298	0.778434	19.3006	2.326	0.217093	0.613546	1.63337	7.53623	5.10686	0.0580982
DC-05_tr2 111	4790.22	62.6352	0.807045	19.2423	2.24322	0.204565	0.600525	1.53321	7.58373	5.05239	0.097755
DC-05_tr2 112	4833.8	62.574	0.803088	19.1532	2.2052	0.236464	0.60845	1.6772	7.60951	5.04195	0.0910035
DC-05_tr2 113	4877.28	62.5129	0.844863	19.1921	2.19632	0.25545	0.598342	1.65237	7.605	5.05974	0.0829263
DC-05_tr2 114	4920.87	62.7766	0.751734	19.0943	2.28391	0.221806	0.596902	1.54318	7.51014	5.11307	0.108434
DC-05_tr2 115	4964.45	62.6663	0.822971	19.136	2.18579	0.207238	0.627694	1.58779	7.59872	5.06238	0.105165
DC-05_tr2 116	5007.93	62.4836	0.764822	19.1901	2.32794	0.222288	0.614536	1.576	7.54006	5.15032	0.130303
DC-05_tr2 117	5051.51	62.7604	0.758973	18.9847	2.32254	0.266366	0.598987	1.59675	7.54826	5.03908	0.123903
DC-05_tr2 118	5095.1	62.7537	0.765256	19.0927	2.15929	0.194439	0.634769	1.62205	7.59367	5.09344	0.0907108
DC-05_tr2 119	5138.57	62.4981	0.756377	19.3223	2.20885	0.273423	0.592777	1.62051	7.55551	5.08862	0.0835029
DC-05_tr2 120	5182.16	62.5284	0.821645	19.2236	2.21732	0.183676	0.606204	1.6501	7.53888	5.13593	0.0942618
DC-05_tr2 121	5225.73	62.5681	0.789135	19.1899	2.28795	0.238894	0.600843	1.58713	7.60587	5.07058	0.0616302
DC-05_tr2 122	5269.22	62.5469	0.826572	19.1162	2.12287	0.273177	0.607347	1.59474	7.67339	5.12595	0.112874
DC-05_tr2 123	5312.81	62.7028	0.844904	19.0655	2.19429	0.264764	0.598875	1.57326	7.50405	5.17521	0.076386
DC-05_tr2 124	5356.38	62.7983	0.791104	19.0949	2.1805	0.219399	0.577416	1.57826	7.61097	5.03591	0.113282
DC-05_tr2 125	5399.87	62.7378	0.756489	19.1395	2.13808	0.209987	0.615706	1.59065	7.62273	5.11281	0.0763306
DC-05_tr2 126	5443.45	62.4042	0.747693	19.245	2.13833	0.238212	0.59832	1.62183	7.79923	5.12373	0.0834673
DC-05_tr2 127	5486.94	62.6586	0.794225	19.1837	2.08004	0.22829	0.604035	1.53429	7.75381	5.08683	0.0760965
DC-05_tr2 128	5530.51	62.7657	0.799063	18.9552	2.1672	0.262552	0.615318	1.62799	7.74591	4.97729	0.0837844
DC-05_tr2 129	5574.1	62.5919	0.808909	19.217	2.17648	0.17546	0.622206	1.59884	7.62285	5.09565	0.0906696
DC-05_tr2 130	5617.57	62.6072	0.778092	19.111	2.26478	0.229063	0.620902	1.5719	7.69405	5.04663	0.07632
DC-05_tr2 131	5661.16	62.5006	0.752849	19.1866	2.21305	0.234995	0.604111	1.59545	7.73023	5.09516	0.0868751
DC-05_tr2 132	5704.75	62.5983	0.730072	19.2746	2.20606	0.209317	0.592219	1.61571	7.64354	5.06462	0.0655605
DC-05_tr2 133	5748.22	62.455	0.749502	19.186	2.34026	0.210417	0.585374	1.59797	7.6909	5.07228	0.112271
DC-05_tr2 134	5791.81	62.5478	0.765162	19.1859	2.21097	0.219444	0.611117	1.53942	7.61442	5.19682	0.108999
DC-05_tr2 135	5835.39	62.505	0.769825	19.2689	2.29737	0.212662	0.591935	1.58332	7.65789	5.02937	0.0837194
DC-05_tr2 136	5878.87	62.4197	0.854876	19.268	2.24071	0.228407	0.59136	1.56953	7.66177	5.11129	0.0544171
DC-05_tr2 137	5922.45	62.4785	0.790451	19.2916	2.1676	0.218205	0.621585	1.62054	7.60724	5.09902	0.105283
DC-05_tr2 138	5966.04	62.7432	0.794129	18.9775	2.18416	0.267354	0.613936	1.58661	7.58276	5.13073	0.119614
DC-05_tr2 139	6009.51	62.7137	0.800386	19.1285	2.16432	0.234262	0.606628	1.60778	7.65757	5.03977	0.0470997
DC-05_tr2 140	6053.1	62.4775	0.778332	19.1817	2.28526	0.266889	0.608127	1.59244	7.58995	5.12891	0.0908933

## Sheet: DC-06
Run	DC-06
Label	Distance (µm)	SiO2	TiO2	Al2O3	FeO	MnO	MgO	CaO	Na2O	K2O	P2O5
Transect 1
DC-06_tr1 001	0	47.7942	3.34051	16.3187	8.36166	0.266411	5.13526	9.50282	5.89258	2.58319	0.804628
DC-06_tr1 002	37.7005	48.1475	3.343	16.063	8.53862	0.180501	5.13352	9.45976	5.87871	2.46326	0.792177
DC-06_tr1 003	75.4006	47.969	3.31997	16.2482	8.58436	0.203749	5.07822	9.37039	5.91597	2.49257	0.817582
DC-06_tr1 004	113.101	48.2167	3.33424	16.3492	8.3408	0.220102	5.04811	9.40028	5.87907	2.49289	0.718576
DC-06_tr1 005	150.802	48.0894	3.12794	16.4683	8.37914	0.24402	5.00263	9.37345	6.03837	2.47542	0.801352
DC-06_tr1 006	188.502	48.3039	3.28922	16.3013	8.34716	0.203662	5.03726	9.25738	5.98885	2.54449	0.726834
DC-06_tr1 007	226.202	48.5088	3.29311	16.2694	8.34116	0.243112	4.94482	9.24961	5.86359	2.54984	0.736562
DC-06_tr1 008	263.902	48.2306	3.22086	16.1043	8.55124	0.258801	5.06283	9.20982	5.98895	2.50054	0.872
DC-06_tr1 009	301.503	48.6199	3.20684	16.148	8.49296	0.202755	5.00681	9.17571	5.97921	2.46203	0.705816
DC-06_tr1 010	339.203	48.388	3.16336	16.2805	8.45966	0.209585	5.00779	9.24277	5.91455	2.56572	0.768067
DC-06_tr1 011	376.903	48.494	3.36179	16.2024	8.28624	0.21024	5.01698	9.30403	5.97308	2.50849	0.642749
DC-06_tr1 012	414.604	48.32	3.23096	16.5161	8.17548	0.232155	5.00645	9.3316	5.81161	2.51871	0.85698
DC-06_tr1 013	452.304	48.3633	3.30972	16.3521	8.19157	0.201583	4.97493	9.32928	5.87476	2.54435	0.858356
DC-06_tr1 014	490.004	48.1501	3.24037	16.295	8.4581	0.25043	4.93821	9.36913	5.97347	2.54675	0.778414
DC-06_tr1 015	527.705	48.3618	3.20767	16.0692	8.62575	0.238725	4.90403	9.22205	5.98354	2.55997	0.827311
DC-06_tr1 016	565.406	48.3681	3.15085	16.1365	8.45047	0.195766	5.124	9.25627	6.05376	2.47936	0.784923
DC-06_tr1 017	603.106	48.5803	3.26755	16.2347	8.20494	0.181107	4.95801	9.24602	5.91663	2.52539	0.885433
DC-06_tr1 018	640.806	48.3998	3.2005	16.3225	8.51746	0.245612	4.90399	9.18853	5.96738	2.5604	0.693786
DC-06_tr1 019	678.507	48.4537	3.28834	16.2031	8.34014	0.23454	5.02068	9.27373	5.8298	2.59333	0.762645
DC-06_tr1 020	716.207	48.9034	3.32726	16.0973	8.32332	0.191032	4.92351	9.11108	5.87712	2.56022	0.685767
DC-06_tr1 021	753.907	48.5095	3.33767	16.1424	8.58111	0.21633	4.9653	9.08588	5.89243	2.54446	0.724913
DC-06_tr1 022	791.607	48.8721	3.25196	16.1672	8.34602	0.191928	4.86765	9.06639	5.87617	2.55217	0.808463
DC-06_tr1 023	829.208	48.4964	3.25368	16.3508	8.32984	0.221889	4.90112	9.21534	5.94106	2.54323	0.7467
DC-06_tr1 024	866.908	48.5203	3.19322	16.2875	8.38737	0.227672	4.99717	9.23752	5.84732	2.48822	0.813752
DC-06_tr1 026	942.309	48.6568	3.26306	15.9126	8.68429	0.195784	4.86362	9.04571	5.91688	2.64349	0.817728
DC-06_tr1 027	980.009	48.5198	3.3077	16.2927	8.47918	0.194161	4.8233	9.04242	6.00097	2.53966	0.800095
DC-06_tr1 028	1017.71	48.8284	3.14022	16.2486	8.26374	0.190479	4.91692	9.07978	5.92923	2.56176	0.840939
DC-06_tr1 029	1055.41	48.5455	3.21637	16.1439	8.59423	0.204979	4.82973	8.96654	6.07077	2.62688	0.801094
DC-06_tr1 030	1093.11	48.9274	3.19632	16.054	8.39938	0.189503	4.76861	9.04071	6.02025	2.61705	0.78677
DC-06_tr1 031	1130.81	49.1749	3.19518	16.1305	8.23532	0.225827	4.79277	8.95681	5.93685	2.57676	0.775089
DC-06_tr1 032	1168.51	48.7355	3.2456	16.2486	8.23249	0.201433	4.80143	9.04646	6.15118	2.55527	0.782035
DC-06_tr1 033	1206.21	48.5082	3.24694	16.3893	8.26681	0.256972	4.78279	9.12235	5.9991	2.64909	0.77844
DC-06_tr1 034	1243.91	48.9025	3.21619	16.0191	8.29817	0.254821	4.8552	9.01975	6.02004	2.63892	0.775286
DC-06_tr1 035	1281.61	48.7826	3.2136	16.0783	8.40082	0.258638	4.89789	8.94847	6.0862	2.60394	0.729517
DC-06_tr1 036	1319.31	48.8752	3.23636	16.2436	8.04966	0.205107	4.79269	9.10096	6.03982	2.65917	0.797442
DC-06_tr1 037	1357.01	49.1017	3.16319	16.0847	8.18707	0.234241	4.79647	9.03472	5.97491	2.59464	0.828321
DC-06_tr1 038	1394.61	48.8763	3.13667	16.3437	8.46075	0.19274	4.76691	8.86315	5.99475	2.60013	0.764873
DC-06_tr1 039	1432.31	48.8862	3.18286	16.2851	8.34341	0.206937	4.73823	8.96144	5.95369	2.61633	0.825792
DC-06_tr1 040	1470.01	48.7659	3.14785	16.3276	8.24635	0.247081	4.7579	8.99977	6.03769	2.68342	0.786448
DC-06_tr1 041	1507.71	48.8157	3.15073	16.3611	8.26809	0.260913	4.77758	8.87558	5.97197	2.70798	0.810334
DC-06_tr1 042	1545.41	49.0237	3.27862	16.2064	8.11356	0.188313	4.81418	8.90209	5.9866	2.72873	0.757819
DC-06_tr1 043	1583.12	49.2763	3.18981	16.2908	8.04702	0.213552	4.70186	8.86518	6.03785	2.67198	0.70559
DC-06_tr1 044	1620.82	49.2526	3.24561	16.1867	8.04166	0.144192	4.80639	8.80655	5.93305	2.77013	0.813159
DC-06_tr1 045	1658.52	49.085	3.10391	16.4992	8.14646	0.222326	4.70226	8.76518	6.01188	2.73267	0.731119
DC-06_tr1 046	1696.22	48.9602	3.10479	16.4585	7.96447	0.214013	4.78699	8.75365	6.18882	2.76212	0.806416
DC-06_tr1 047	1733.92	49.2755	3.1958	16.3526	8.18665	0.240515	4.61731	8.70545	6.01807	2.69776	0.71034
DC-06_tr1 048	1771.62	49.2828	3.12646	16.311	7.99097	0.255156	4.62798	8.73145	6.18092	2.7048	0.788402
DC-06_tr1 049	1809.32	48.909	3.19734	16.4096	8.25121	0.24568	4.72382	8.6844	6.11621	2.70227	0.760452
DC-06_tr1 050	1847.02	49.3572	3.14232	16.4145	7.88681	0.229782	4.64112	8.72407	6.13993	2.75987	0.704438
DC-06_tr1 051	1884.72	49.2336	3.16937	16.425	8.04214	0.195014	4.6663	8.76479	6.0187	2.69448	0.79069
DC-06_tr1 052	1922.32	49.6555	3.07307	16.1414	7.98792	0.219875	4.60444	8.71222	6.10476	2.70058	0.800241
DC-06_tr1 053	1960.02	49.1498	3.15089	16.4178	8.08453	0.210094	4.68488	8.72714	6.05303	2.79849	0.723358
DC-06_tr1 054	1997.72	49.33	3.061	16.367	8.13143	0.19428	4.63314	8.70406	6.18447	2.74865	0.646037
DC-06_tr1 055	2035.42	49.2531	3.1469	16.4902	7.92936	0.239951	4.60648	8.70573	6.03501	2.76389	0.829374
DC-06_tr1 056	2073.12	49.4105	3.2031	16.3462	7.91477	0.216158	4.64967	8.70005	6.0859	2.74847	0.725245
DC-06_tr1 057	2110.82	49.3497	3.15879	16.4154	7.92287	0.206616	4.62944	8.62713	6.07938	2.74452	0.866234
DC-06_tr1 058	2148.52	49.3924	3.156	16.5329	7.94156	0.192557	4.62054	8.64289	6.12635	2.74345	0.651414
DC-06_tr1 059	2186.22	49.5836	3.13951	16.449	7.8745	0.218736	4.61147	8.48182	6.12461	2.72777	0.788994
DC-06_tr1 060	2223.92	49.3423	3.17805	16.3546	7.94511	0.202549	4.64325	8.58485	6.17036	2.79627	0.782749
DC-06_tr1 061	2261.62	49.4033	3.11339	16.502	7.89137	0.23818	4.58275	8.62091	6.13431	2.72293	0.790884
DC-06_tr1 062	2299.32	49.3731	3.12644	16.272	8.02764	0.230201	4.49878	8.56419	6.11875	2.82721	0.961769
DC-06_tr1 063	2337.02	49.263	3.14248	16.6059	8.03078	0.25109	4.54941	8.57507	6.0693	2.75224	0.760768
DC-06_tr1 064	2374.72	49.6992	3.09848	16.388	7.88517	0.224305	4.64257	8.49251	6.09402	2.74849	0.727268
DC-06_tr1 065	2412.42	49.6164	3.10489	16.2465	7.9118	0.210225	4.6006	8.66481	6.04474	2.79543	0.80459
DC-06_tr1 066	2450.12	49.1405	3.15638	16.4833	7.98378	0.251066	4.52827	8.66457	6.18898	2.73347	0.869655
DC-06_tr1 067	2487.72	49.5989	3.07798	16.2679	7.90154	0.249337	4.50336	8.68653	6.1663	2.76812	0.780032
DC-06_tr1 069	2563.12	49.5117	3.09513	16.2831	8.1053	0.18871	4.56506	8.4262	6.19026	2.86739	0.767157
DC-06_tr1 070	2600.82	49.5166	3.06943	16.3148	7.94929	0.228698	4.57813	8.47994	6.21168	2.90295	0.748524
DC-06_tr1 071	2638.53	49.7669	3.12856	16.5233	7.56241	0.254428	4.5478	8.47404	6.17424	2.85921	0.709105
DC-06_tr1 072	2676.23	49.7083	3.17902	16.2563	7.93722	0.240181	4.55177	8.31912	6.23418	2.7868	0.787116
DC-06_tr1 073	2713.93	49.7453	3.1627	16.4543	7.70004	0.226143	4.45465	8.26849	6.19104	2.92498	0.872326
DC-06_tr1 075	2789.33	50.3137	3.01571	16.3429	7.59628	0.230168	4.38366	8.24917	6.15578	2.99499	0.717657
DC-06_tr1 076	2827.03	50.2906	2.93826	16.4646	7.59824	0.224545	4.31976	8.12403	6.28891	2.93826	0.812815
DC-06_tr1 077	2864.73	50.5587	2.90792	16.3957	7.48636	0.254495	4.25877	8.04319	6.21801	2.99042	0.886401
DC-06_tr1 078	2902.43	50.5109	2.87427	16.5657	7.39687	0.203362	4.25474	7.97378	6.34606	3.08031	0.793979
DC-06_tr1 079	2940.13	50.6444	2.87212	16.6748	7.25263	0.258491	4.12222	7.89317	6.53976	3.04776	0.694579
DC-06_tr1 080	2977.83	50.9742	2.79749	16.6301	7.14341	0.22607	4.10849	7.8144	6.41049	3.12782	0.767504
DC-06_tr1 081	3015.43	51.4065	2.76133	16.5888	7.18362	0.183847	4.05895	7.59886	6.45695	3.11428	0.646941
DC-06_tr1 082	3053.13	51.7399	2.70852	16.7557	6.97212	0.222449	3.85166	7.54884	6.50869	3.14106	0.550973
DC-06_tr1 083	3090.83	51.8647	2.61137	16.8496	6.75641	0.168185	3.86524	7.37816	6.66314	3.18131	0.661858
DC-06_tr1 084	3128.53	51.7711	2.60255	16.9736	6.88485	0.194932	3.79496	7.25812	6.54268	3.35947	0.617666
DC-06_tr1 085	3166.23	52.5847	2.26614	16.9857	6.64391	0.215798	3.70823	7.01473	6.61301	3.37861	0.589093
DC-06_tr1 086	3203.93	52.7216	2.31244	17.2194	6.36953	0.195215	3.57189	6.96829	6.68956	3.46866	0.483444
DC-06_tr1 087	3241.63	53.694	2.26905	16.8219	6.19864	0.238457	3.48609	6.71433	6.61119	3.48609	0.480214
DC-06_tr1 088	3279.33	53.9852	2.21504	16.8137	6.04757	0.205123	3.42043	6.5421	6.74815	3.56467	0.45805
DC-06_tr1 089	3317.03	54.0103	2.06336	17.1083	5.9205	0.200737	3.26613	6.39746	6.92626	3.70161	0.405311
DC-06_tr1 091	3392.43	55.2142	1.9128	17.1844	5.56359	0.158372	2.99261	5.93381	6.89021	3.79476	0.355206
DC-06_tr1 092	3430.13	55.8353	1.73613	17.444	5.34274	0.155839	2.89355	5.6321	6.85152	3.84429	0.264554
DC-06_tr1 093	3467.83	56.7087	1.57001	17.2097	5.05925	0.159269	2.67843	5.37738	7.01932	3.99198	0.225973
DC-06_tr1 094	3505.53	56.9475	1.34954	17.7786	4.6982	0.143947	2.48363	5.09144	7.07834	4.21182	0.216904
DC-06_tr1 095	3543.13	58.0281	1.23334	17.7002	4.50494	0.153395	2.24731	4.68019	7.03059	4.29876	0.12319
DC-06_tr1 096	3580.83	58.5835	1.06067	17.7551	4.17645	0.1542	2.14995	4.41305	7.29336	4.32047	0.0933015
DC-06_tr1 097	3618.53	59.5436	0.929795	17.7177	3.93728	0.126776	1.9171	4.17434	7.13245	4.44232	0.0786424
DC-06_tr1 098	3656.23	60.1232	0.834194	17.5652	3.69304	0.10055	1.77928	3.89994	7.29299	4.57234	0.139239
DC-06_tr1 099	3693.94	60.3194	0.727344	17.8169	3.55306	0.155033	1.6186	3.61503	7.39532	4.67888	0.120432
DC-06_tr1 100	3731.64	60.7443	0.712847	18.0044	3.2313	0.142776	1.51355	3.49971	7.29881	4.76952	0.0827956
DC-06_tr1 101	3769.34	61.1294	0.707613	17.9926	3.03839	0.121845	1.41864	3.31742	7.35827	4.83661	0.0791634
DC-06_tr1 102	3807.04	61.286	0.74443	18.0471	3.05761	0.0956404	1.26371	3.16056	7.40209	4.84894	0.0938902
DC-06_tr1 103	3844.74	61.637	0.735555	18.1462	2.67493	0.148516	1.14671	3.06739	7.39479	4.94707	0.101833
DC-06_tr1 104	3882.44	61.4392	0.743299	18.3536	2.70571	0.147837	1.13239	2.99377	7.45871	4.92789	0.0976319
DC-06_tr1 105	3920.14	61.8878	0.732329	18.4447	2.51426	0.143848	1.07134	2.88521	7.3882	4.89456	0.0377138
DC-06_tr1 106	3957.84	61.7323	0.720501	18.3667	2.46395	0.185412	1.01813	2.85408	7.50479	5.07163	0.0825424
DC-06_tr1 107	3995.54	61.8608	0.733332	18.4257	2.49579	0.146666	0.978495	2.74229	7.45657	5.03267	0.127666
DC-06_tr1 108	4033.24	61.6955	0.747749	18.6629	2.31358	0.171308	0.938799	2.72488	7.46515	5.18242	0.0977873
DC-06_tr1 109	4070.94	62.1279	0.72725	18.5527	2.2288	0.17201	0.89472	2.63123	7.43966	5.09736	0.128363
DC-06_tr1 110	4108.54	61.9447	0.750177	18.4402	2.32821	0.180488	0.950753	2.64756	7.53062	5.1406	0.0866382
DC-06_tr1 111	4146.24	62.149	0.816208	18.4431	2.36582	0.155835	0.882348	2.56126	7.39576	5.1328	0.0978215
DC-06_tr1 112	4183.94	62.0791	0.803425	18.3972	2.34727	0.209298	0.892991	2.59435	7.4742	5.12693	0.0752567
DC-06_tr1 113	4221.64	62.1855	0.742857	18.1708	2.42415	0.183352	0.871152	2.54741	7.57032	5.21808	0.0863859
DC-06_tr1 114	4259.34	62.1973	0.769511	18.4732	2.32465	0.201263	0.829951	2.52095	7.41821	5.19688	0.0680864
DC-06_tr1 115	4297.04	62.2152	0.787881	18.5752	2.18713	0.199922	0.835936	2.48491	7.49581	5.08277	0.135233
DC-06_tr1 116	4334.74	62.3237	0.756398	18.3972	2.27775	0.185106	0.878839	2.45296	7.52378	5.13266	0.0716305
DC-06_tr1 117	4372.44	62.2442	0.772937	18.5587	2.26101	0.182722	0.829002	2.41447	7.47872	5.18702	0.0712064
DC-06_tr1 118	4410.14	62.1666	0.74363	18.5624	2.26622	0.176044	0.821093	2.42074	7.51973	5.19171	0.131853
DC-06_tr1 119	4447.84	62.1818	0.743832	18.6937	2.29807	0.160453	0.807828	2.32898	7.53313	5.21445	0.0377172
DC-06_tr1 120	4485.54	62.7313	0.741177	18.3789	2.07027	0.171537	0.810468	2.37658	7.48888	5.16511	0.065805
DC-06_tr1 121	4523.24	61.895	0.797568	18.9403	2.23915	0.207789	0.81431	2.30077	7.50833	5.21783	0.0789864
DC-06_tr1 122	4560.94	62.3253	0.757611	18.5665	2.27345	0.206147	0.799803	2.30417	7.47576	5.21255	0.0787514
DC-06_tr1 123	4598.64	62.4873	0.737626	18.5706	2.14076	0.163155	0.818476	2.3486	7.40952	5.24797	0.0760697
DC-06_tr1 124	4636.24	62.4266	0.785227	18.6406	2.15722	0.180874	0.77693	2.30103	7.43411	5.23264	0.0648272
DC-06_tr1 125	4673.94	62.4435	0.765699	18.5565	2.14788	0.178852	0.840875	2.24082	7.6415	5.10122	0.0832304
DC-06_tr1 126	4711.64	62.2223	0.76121	18.8107	2.21602	0.186677	0.776834	2.26709	7.40377	5.26944	0.0859858
DC-06_tr1 127	4749.35	62.4146	0.778107	18.5942	2.23458	0.214131	0.798915	2.25508	7.35978	5.23795	0.112652
DC-06_tr1 129	4824.75	62.3271	0.824505	18.6787	2.07996	0.23187	0.765487	2.21316	7.55138	5.21527	0.112605
DC-06_tr1 130	4862.45	62.2229	0.758085	18.8803	2.21638	0.215482	0.772656	2.20612	7.33664	5.30495	0.0865005
DC-06_tr1 131	4900.15	62.4732	0.775159	18.6959	2.13872	0.15278	0.741697	2.14896	7.50088	5.33146	0.0412395
DC-06_tr1 132	4937.85	62.6445	0.748871	18.5121	2.11713	0.173768	0.786815	2.23986	7.44575	5.22634	0.104834
DC-06_tr1 133	4975.55	62.1854	0.735749	18.784	2.20807	0.248947	0.749305	2.18753	7.49716	5.26855	0.13536
DC-06_tr1 134	5013.25	62.2951	0.726725	18.8819	2.06729	0.202635	0.772369	2.14916	7.55278	5.2808	0.0712294
DC-06_tr1 135	5050.95	62.6795	0.743422	18.6294	1.99195	0.19775	0.764477	2.15709	7.44144	5.27403	0.120962
DC-06_tr1 136	5088.65	62.3116	0.76863	18.8113	2.06852	0.231633	0.795357	2.17092	7.43439	5.28395	0.123702
DC-06_tr1 137	5126.35	62.6274	0.797707	18.7065	2.13526	0.176848	0.787082	2.04331	7.33548	5.28195	0.1085
DC-06_tr1 138	5164.05	62.4761	0.765383	18.9067	1.94598	0.212828	0.753195	2.05864	7.38447	5.41801	0.0787608
DC-06_tr1 139	5201.65	62.4142	0.734959	18.8963	2.00741	0.18077	0.763431	2.06886	7.56877	5.30531	0.0600176
DC-06_tr1 140	5239.35	62.8343	0.764998	18.5526	1.98154	0.162219	0.76623	2.10474	7.45388	5.30806	0.0714586
DC-06_tr1 141	5277.05	62.4228	0.738029	18.7054	2.15989	0.171976	0.763907	2.07838	7.59017	5.3284	0.0410582
DC-06_tr1 142	5314.75	62.5024	0.768782	18.8658	1.97515	0.197312	0.753205	2.04642	7.45263	5.34513	0.0932597
DC-06_tr1 144	5390.15	62.6423	0.793006	18.6998	2.01084	0.206596	0.769121	2.01084	7.32885	5.43029	0.108402
DC-06_tr1 145	5427.85	62.5658	0.781205	18.6799	2.01199	0.195684	0.776711	2.01199	7.48625	5.42319	0.0673047
DC-06_tr1 146	5465.55	62.6144	0.808876	18.8445	1.81609	0.246295	0.738068	2.04055	7.38681	5.44828	0.0561152
DC-06_tr1 147	5503.25	62.5386	0.791397	19.0518	1.88672	0.203028	0.766685	1.94824	7.29054	5.41407	0.108897
DC-06_tr1 149	5578.65	62.7551	0.8099	18.8448	1.87025	0.195868	0.726145	1.96173	7.47084	5.30582	0.0595634
DC-06_tr1 150	5616.35	62.9415	0.799673	18.8212	1.79541	0.225243	0.741526	1.88722	7.35507	5.36584	0.067328
DC-06_tr1 151	5654.05	62.7052	0.782638	19.0695	1.87317	0.184963	0.737907	1.83223	7.40057	5.31244	0.101336
DC-06_tr1 152	5691.75	63.0997	0.768958	18.9645	1.82116	0.17296	0.716358	1.79064	7.2236	5.3414	0.100723
DC-06_tr1 153	5729.35	63.1894	0.790888	18.7772	1.60219	0.187976	0.683531	1.78588	7.43945	5.40865	0.134808
DC-06_tr1 154	5767.05	62.9819	0.836641	19.1976	1.51506	0.143168	0.678627	1.69809	7.36179	5.46033	0.126798
DC-06_tr1 155	5804.76	63.328	0.852147	19.0398	1.49411	0.133359	0.640751	1.55468	7.25854	5.57262	0.12599
DC-06_tr1 156	5842.46	63.4613	0.857089	19.2609	1.39174	0.144152	0.588086	1.54412	7.15172	5.52633	0.0745648
DC-06_tr1 157	5880.16	63.7625	0.843258	18.8851	1.41537	0.162161	0.591423	1.51647	7.13751	5.60082	0.0854277
DC-06_tr1 158	5917.86	64.1512	0.769185	19.1864	1.14123	0.134376	0.543904	1.38256	6.97781	5.58631	0.126962
DC-06_tr1 159	5955.56	64.2503	0.752638	19.1547	1.06787	0.141486	0.504557	1.30958	7.05914	5.63315	0.126518
DC-06_tr1 160	5993.26	64.6943	0.745745	18.8348	1.03722	0.156051	0.430122	1.2626	7.07311	5.61422	0.151825

## Sheet: DC-07
Experiment	DC-07
Label	Distance (µm)	SiO2	TiO2	Al2O3	FeO	MnO	MgO	CaO	Na2O	K2O	P2O5
Transect 1
DC-07_tr1 001	0	48.975	3.56827	16.5372	8.91024	0.240389	4.80986	7.83558	5.83235	2.46231	0.82884
DC-07_tr1 002	16.9331	48.8166	3.57856	16.6095	9.07681	0.253003	4.71577	7.85614	5.90515	2.41005	0.778415
DC-07_tr1 003	33.8662	48.9125	3.60785	16.7244	8.80229	0.260265	4.75976	7.91119	5.63999	2.45595	0.925871
DC-07_tr1 004	50.7993	48.9296	3.6541	16.5528	8.72404	0.274006	4.8305	7.75586	5.68416	2.81085	0.784123
DC-07_tr1 005	67.716	48.7576	3.57556	16.976	8.38841	0.258363	4.83382	7.90607	5.82994	2.51652	0.957642
DC-07_tr1 006	84.649	49.1483	3.53742	16.9254	8.44181	0.203793	4.69569	7.80529	5.97918	2.47306	0.790129
DC-07_tr1 007	101.582	48.9802	3.58341	16.917	8.5731	0.239901	4.6876	7.91684	5.83346	2.42714	0.841268
DC-07_tr1 008	118.515	48.8262	3.54206	16.9685	8.55738	0.288903	4.74365	7.86777	5.74671	2.62259	0.836303
DC-07_tr1 009	135.448	49.0897	3.59424	16.7101	8.58623	0.232469	4.71875	7.92414	5.7697	2.50125	0.873442
DC-07_tr1 010	152.381	48.9882	3.59854	16.9466	8.49422	0.279828	4.69693	7.85611	5.83716	2.50015	0.802244
DC-07_tr1 011	169.315	48.9092	3.5992	16.9676	8.20575	0.277233	4.66951	7.93293	5.98118	2.56036	0.896966
DC-07_tr1 012	186.133	48.9336	3.6053	16.8212	8.54162	0.251952	4.71623	7.78703	5.94246	2.51533	0.88529
DC-07_tr1 013	203.066	49.4232	3.46004	16.7462	8.46717	0.289138	4.59945	7.79816	5.78067	2.64468	0.791315
DC-07_tr1 014	219.999	49.1497	3.48222	16.9286	8.61116	0.234421	4.64646	7.75109	5.82119	2.52776	0.847376
DC-07_tr1 015	236.932	49.3808	3.54292	16.6559	8.3332	0.230814	4.6016	7.8091	6.04812	2.54713	0.850406
DC-07_tr1 016	253.865	49.1006	3.65211	16.7414	8.51119	0.254815	4.63017	7.73082	5.95159	2.60122	0.826043
DC-07_tr1 017	270.798	49.1953	3.51395	16.9858	8.39385	0.235445	4.52538	7.7578	6.03732	2.5338	0.821346
DC-07_tr1 018	287.731	49.1794	3.50236	16.8949	8.46838	0.210141	4.54784	7.67382	6.06378	2.56142	0.897962
DC-07_tr1 019	304.648	49.6705	3.47485	16.9151	8.17059	0.239274	4.61226	7.71145	5.82272	2.5357	0.847529
DC-07_tr1 020	321.581	49.3395	3.51682	17.0118	8.35504	0.278432	4.54689	7.66833	5.75385	2.65322	0.876083
DC-07_tr1 021	338.514	49.3165	3.53752	16.9884	8.24377	0.214442	4.64364	7.64897	5.98978	2.60879	0.808099
DC-07_tr1 022	355.447	49.2808	3.46067	17.1163	8.44903	0.238194	4.47913	7.45136	6.04838	2.65006	0.826092
DC-07_tr1 023	372.38	49.4283	3.47852	16.976	8.34219	0.226937	4.50958	7.46736	6.11344	2.54119	0.916496
DC-07_tr1 024	389.313	49.4093	3.47514	17.2305	8.2781	0.246268	4.46063	7.46896	6.08928	2.58302	0.758826
DC-07_tr1 025	406.246	49.7976	3.41066	16.9389	8.32907	0.258607	4.45049	7.28924	6.04144	2.62038	0.863582
DC-07_tr1 026	423.163	49.9367	3.37862	17.0082	8.01246	0.294557	4.45602	7.42669	5.94135	2.73009	0.815367
DC-07_tr1 027	440.096	49.7929	3.46956	17.1499	7.84559	0.254539	4.48022	7.38715	6.09518	2.69855	0.826444
DC-07_tr1 028	457.029	49.6458	3.38329	17.0622	8.29686	0.233915	4.35143	7.33913	5.99623	2.83155	0.859563
DC-07_tr1 029	473.962	49.9194	3.38028	16.87	8.26757	0.256504	4.33262	7.39895	6.05939	2.67911	0.836176
DC-07_tr1 030	490.895	50.227	3.30756	16.8602	8.20648	0.279894	4.29566	7.19757	6.03265	2.72509	0.867869
DC-07_tr1 031	507.828	50.0305	3.39332	17.0818	7.86538	0.256803	4.3778	7.20557	6.10588	2.82777	0.855138
DC-07_tr1 032	524.762	50.1369	3.37011	17.1928	7.84977	0.254262	4.28264	7.13427	6.14916	2.75831	0.871771
DC-07_tr1 033	541.58	50.1714	3.39151	17.2925	7.68324	0.247245	4.32313	7.13892	6.09216	2.83673	0.823174
DC-07_tr1 034	558.513	50.0971	3.30781	17.259	8.01387	0.273494	4.19476	7.15822	6.13562	2.79651	0.763613
DC-07_tr1 035	575.446	50.2566	3.2916	17.3198	7.9746	0.246403	4.19497	7.09199	6.10555	2.77242	0.746061
DC-07_tr1 036	592.379	50.6458	3.23426	17.2528	7.66446	0.305642	4.17022	7.04049	6.09413	2.75588	0.836331
DC-07_tr1 037	609.312	50.6389	3.15714	17.25	7.98632	0.213834	4.12297	6.99971	5.98195	2.86635	0.782846
DC-07_tr1 038	626.245	50.6328	3.23699	17.2814	7.82099	0.213642	4.10367	6.93343	6.10852	2.87153	0.797031
DC-07_tr1 039	643.178	50.8259	3.14355	17.3258	7.6047	0.255634	4.02541	6.91996	6.17298	2.88418	0.841808
DC-07_tr1 040	660.111	50.8933	3.11826	17.3329	7.66528	0.286483	4.06729	6.87268	6.20523	2.8471	0.711463
DC-07_tr1 041	677.028	51.01	2.97968	17.4181	7.43351	0.286049	4.02518	6.94213	6.26255	2.84376	0.799077
DC-07_tr1 042	693.961	51.1916	3.10788	17.2856	7.43188	0.26682	3.98099	6.75625	6.28851	2.92078	0.769693
DC-07_tr1 043	710.894	51.1275	3.10019	17.4167	7.35395	0.246059	3.96536	6.74627	6.31368	2.9457	0.784627
DC-07_tr1 044	727.827	51.213	2.97762	17.418	7.392	0.24987	3.91464	6.72568	6.36128	2.90474	0.843104
DC-07_tr1 045	744.76	51.7079	2.91033	17.5037	6.98897	0.230219	3.98475	6.68646	6.27964	2.95206	0.755956
DC-07_tr1 046	761.693	51.5154	2.85617	17.4289	7.35934	0.26404	3.77349	6.57754	6.40033	3.13762	0.68715
DC-07_tr1 047	778.627	51.5055	2.85619	17.7021	7.25032	0.234354	3.78732	6.48658	6.40288	3.01312	0.76165
DC-07_tr1 048	795.543	51.9527	2.90186	17.3592	7.23905	0.271776	3.76514	6.35497	6.38617	3.05787	0.71132
DC-07_tr1 049	812.476	52.1691	2.85014	17.8212	6.90089	0.267057	3.70623	6.23273	6.37889	3.05894	0.614816
DC-07_tr1 050	829.409	52.2213	2.79369	17.5692	7.05665	0.218942	3.64214	6.22889	6.45653	3.09375	0.718909
DC-07_tr1 051	846.342	52.7985	2.73347	17.8039	6.58942	0.238945	3.58573	6.09054	6.40234	3.07645	0.680665
DC-07_tr1 052	863.276	52.8087	2.64408	17.5925	6.7247	0.228702	3.57054	6.11052	6.50609	3.15415	0.660082
DC-07_tr1 053	880.209	52.7332	2.62318	17.7713	6.77051	0.181964	3.48375	6.01362	6.54241	3.1727	0.707326
DC-07_tr1 054	897.142	53.5046	2.56422	17.345	6.6086	0.247666	3.4815	5.91021	6.53563	3.25218	0.550369
DC-07_tr1 055	913.96	53.1424	2.566	17.8259	6.49355	0.198158	3.41435	5.95941	6.50403	3.2782	0.61804
DC-07_tr1 056	930.893	53.5745	2.5214	17.5769	6.55355	0.197127	3.35492	5.85548	6.52229	3.27157	0.572316
DC-07_tr1 057	947.826	53.8319	2.45302	17.7611	6.29298	0.180613	3.30174	5.69266	6.57244	3.30174	0.611806
DC-07_tr1 058	964.759	54.0522	2.32056	17.7596	6.26132	0.21554	3.26132	5.67596	6.63763	3.34495	0.470906
DC-07_tr1 059	981.692	54.2153	2.35673	17.8424	6.04826	0.25507	3.17012	5.51643	6.70522	3.39954	0.490952
DC-07_tr1 060	998.625	54.1886	2.33885	17.6505	6.26812	0.191994	3.10807	5.51969	6.80865	3.48229	0.443238
DC-07_tr1 061	1015.56	54.4838	2.23693	18.0404	6.08942	0.21779	2.99293	5.28164	6.66937	3.57287	0.414868
DC-07_tr1 062	1032.47	55.012	2.13184	17.7827	5.76118	0.203409	2.97418	5.418	6.73871	3.52534	0.452679
DC-07_tr1 063	1049.41	55.1377	2.07871	18.0432	5.59172	0.216289	2.98294	5.15519	6.82855	3.51301	0.452742
DC-07_tr1 064	1066.34	55.2879	2.0268	18.3771	5.42222	0.140205	2.82081	5.16104	6.74905	3.54168	0.473269
DC-07_tr1 065	1083.27	55.6634	1.94489	18.0968	5.59546	0.160895	2.76653	4.98183	6.76031	3.61937	0.410507
DC-07_tr1 066	1100.21	55.872	1.90344	18.124	5.6172	0.211654	2.76205	4.75859	6.80685	3.58963	0.354515
DC-07_tr1 067	1117.14	55.8944	1.91561	18.1206	5.39477	0.238778	2.6715	4.73207	6.96868	3.74838	0.315195
DC-07_tr1 068	1134.07	56.2953	1.75536	18.235	5.42095	0.184312	2.5814	4.64653	6.78393	3.7895	0.307703
DC-07_tr1 069	1150.99	56.7743	1.72873	18.1407	5.18306	0.201078	2.58112	4.64186	6.79626	3.73638	0.216481
DC-07_tr1 070	1167.92	56.74	1.72718	18.2086	5.05738	0.166127	2.52869	4.4563	7.01607	3.85521	0.244371
DC-07_tr1 071	1184.86	57.1756	1.63716	18.1008	4.97901	0.176962	2.43764	4.33588	6.97061	3.85873	0.327681
DC-07_tr1 072	1201.79	57.3339	1.52309	18.4332	4.85355	0.211388	2.36482	4.27526	6.9602	3.87251	0.172146
DC-07_tr1 073	1218.72	57.7124	1.50937	18.3168	4.73495	0.214942	2.29479	4.14308	6.93628	3.93541	0.202066
DC-07_tr1 074	1235.66	57.7107	1.34021	18.4443	4.72479	0.169348	2.27452	4.09413	7.04066	4.02176	0.179687
DC-07_tr1 075	1252.59	58.108	1.31329	18.4781	4.64534	0.140909	2.13686	3.92273	7.02995	4.07758	0.147206
DC-07_tr1 076	1269.41	58.4064	1.30527	18.359	4.3523	0.215006	2.09787	3.93481	7.04509	4.16443	0.119819
DC-07_tr1 077	1286.34	58.8912	1.20356	18.2712	4.50296	0.142767	2.04397	3.7248	6.96195	4.17094	0.0866352
DC-07_tr1 078	1303.27	58.85	1.19538	18.5152	4.25447	0.18319	2.00332	3.68652	7.07357	4.13055	0.107807
DC-07_tr1 079	1320.21	59.2276	1.15271	18.4466	4.28077	0.175367	1.84052	3.55697	7.07257	4.15669	0.090165
DC-07_tr1 080	1337.14	59.4936	1.03974	18.4329	4.05028	0.224522	1.84949	3.58532	6.95366	4.21559	0.154882
DC-07_tr1 081	1354.07	59.4592	1.04533	18.5	4.04202	0.124992	1.80336	3.472	7.15127	4.31149	0.0902719
DC-07_tr1 082	1371.01	59.9726	0.95117	18.6237	3.97666	0.131375	1.68331	3.35205	6.98517	4.23691	0.0871325
DC-07_tr1 083	1387.92	60.0878	0.926535	18.5514	3.82396	0.14097	1.63262	3.20386	7.20351	4.37171	0.0576694
DC-07_tr1 084	1404.86	60.2984	0.984046	18.4832	3.678	0.135516	1.56351	3.13925	7.15915	4.47576	0.0830917
DC-07_tr1 085	1421.79	60.3975	0.917484	18.5997	3.64762	0.105812	1.53655	3.07929	7.18157	4.42261	0.111805
DC-07_tr1 086	1438.72	60.5201	0.85503	18.4593	3.57345	0.1928	1.45753	3.04366	7.29232	4.51875	0.0870508
DC-07_tr1 087	1455.65	60.6894	0.855155	18.6042	3.59352	0.149593	1.43022	2.96722	7.23838	4.4149	0.0573937
DC-07_tr1 088	1472.59	60.6732	0.848374	18.9398	3.41081	0.165285	1.37669	2.86467	7.15136	4.46187	0.107992
DC-07_tr1 089	1489.52	61.15	0.823154	18.6239	3.27204	0.102997	1.34143	2.77814	7.2952	4.53763	0.0755243
DC-07_tr1 090	1506.44	61.1394	0.762929	18.893	3.31708	0.112698	1.28892	2.68869	7.25226	4.42965	0.115377
DC-07_tr1 091	1523.37	61.1609	0.788803	18.721	3.24236	0.21571	1.30159	2.73639	7.23853	4.53311	0.061543
DC-07_tr1 092	1540.3	61.3296	0.777605	18.9373	2.96024	0.195562	1.24103	2.54767	7.26136	4.65181	0.0977808
DC-07_tr1 093	1557.24	61.4471	0.752729	19.0092	2.9944	0.170887	1.12011	2.60203	7.22785	4.5742	0.1015
DC-07_tr1 094	1574.17	61.4809	0.804632	18.9101	2.93699	0.152929	1.10864	2.51447	7.37854	4.64765	0.065129
DC-07_tr1 095	1591.1	61.482	0.729541	18.9159	3.00039	0.145659	1.06436	2.51243	7.32967	4.69265	0.127387
DC-07_tr1 096	1608.04	61.6708	0.749551	19.066	2.80322	0.164483	1.06244	2.4219	7.2863	4.69951	0.0758517
DC-07_tr1 097	1624.85	61.7971	0.755194	19.0582	2.69897	0.147357	0.954049	2.47147	7.38339	4.63271	0.101547
DC-07_tr1 098	1641.79	61.9312	0.795375	18.9669	2.71104	0.157611	0.975767	2.32964	7.25692	4.74174	0.133799
DC-07_tr1 099	1658.72	61.8065	0.827265	19.1059	2.69535	0.185565	0.920877	2.34288	7.29818	4.7376	0.0799275
DC-07_tr1 100	1675.65	61.6386	0.839033	19.2608	2.70253	0.131489	0.899736	2.25558	7.27605	4.85417	0.142091
DC-07_tr1 101	1692.59	62.0783	0.806894	19.1169	2.53929	0.125932	0.863151	2.33284	7.2669	4.77923	0.0905266
DC-07_tr1 102	1709.52	62.1118	0.774406	18.9904	2.56515	0.197144	0.8646	2.24451	7.28172	4.86137	0.108915
DC-07_tr1 103	1726.45	61.988	0.860807	19.1026	2.64482	0.183898	0.818655	2.14892	7.33525	4.79374	0.123253
DC-07_tr1 104	1743.37	62.2858	0.786692	19.1569	2.46421	0.135377	0.781434	2.14459	7.28953	4.89749	0.0579451
DC-07_tr1 105	1760.3	62.1768	0.824127	19.0238	2.58856	0.190855	0.813752	2.11604	7.43697	4.73542	0.0936811
DC-07_tr1 106	1777.24	62.2826	0.752453	19.1599	2.45825	0.202548	0.762162	2.13806	7.27147	4.88552	0.0869685
DC-07_tr1 107	1794.17	62.3773	0.823584	19.1524	2.34096	0.212655	0.754598	2.06129	7.31292	4.90981	0.0544843
DC-07_tr1 108	1811.1	62.2205	0.820654	19.163	2.407	0.179027	0.769621	2.0661	7.33464	4.93797	0.101445
DC-07_tr1 109	1828.03	62.3637	0.816682	19.2736	2.41049	0.20211	0.744162	1.96754	7.39629	4.73857	0.0868394
DC-07_tr1 110	1844.97	62.0576	0.850838	19.2947	2.46709	0.18164	0.725736	2.05591	7.39099	4.90334	0.0721624
DC-07_tr1 111	1861.88	62.345	0.771188	19.2616	2.34193	0.210568	0.739309	2.02211	7.29404	4.94179	0.0724246
DC-07_tr1 112	1878.82	62.4582	0.808851	19.085	2.42676	0.205246	0.740984	1.96403	7.26999	4.9255	0.115477
DC-07_tr1 113	1895.75	62.3479	0.777662	19.081	2.42792	0.182198	0.687705	1.97139	7.43941	5.00111	0.0837323
DC-07_tr1 114	1912.68	62.2923	0.778472	19.4074	2.34049	0.179576	0.648399	1.95731	7.43572	4.89846	0.0618263
DC-07_tr1 115	1929.62	62.3758	0.819787	19.2928	2.38833	0.172146	0.671008	1.90239	7.3511	4.92141	0.105252
DC-07_tr1 116	1946.55	62.3762	0.774504	19.2333	2.43132	0.231027	0.68739	1.87263	7.42845	4.91437	0.050799
DC-07_tr1 117	1963.48	62.3437	0.782084	19.3996	2.26188	0.194416	0.664361	1.91471	7.41686	4.87093	0.151493
DC-07_tr1 118	1980.42	62.4677	0.799528	19.3689	2.44584	0.221686	0.654443	1.89422	7.07731	4.96452	0.105847
DC-07_tr1 119	1997.23	62.5597	0.806339	19.1215	2.33316	0.218798	0.646647	1.87689	7.39351	4.96703	0.0764238
DC-07_tr1 120	2014.17	62.4274	0.780523	19.353	2.37524	0.174322	0.65794	1.79692	7.41487	4.93636	0.0834431
DC-07_tr1 121	2031.1	62.4858	0.788278	19.224	2.28292	0.186145	0.618763	1.91104	7.37558	5.05134	0.0761316
DC-07_tr1 122	2048.03	62.5149	0.832879	19.2789	2.34933	0.182176	0.627004	1.75169	7.35712	4.99748	0.108502
DC-07_tr1 123	2064.97	62.4421	0.80187	19.374	2.25806	0.166829	0.630608	1.83532	7.43408	4.95949	0.0976432
DC-07_tr1 124	2081.9	62.2965	0.802309	19.2624	2.46056	0.222789	0.612361	1.85314	7.38169	5.00349	0.104703
DC-07_tr1 125	2098.83	62.1974	0.776249	19.3362	2.36389	0.218453	0.630372	1.83513	7.46493	5.10104	0.0763082
DC-07_tr1 126	2115.75	62.2756	0.83662	19.3486	2.42886	0.239181	0.620492	1.83194	7.31746	5.03269	0.0685433
DC-07_tr1 127	2132.68	62.4973	0.844206	19.324	2.33006	0.218301	0.620313	1.75013	7.37334	4.9915	0.0508471
DC-07_tr1 128	2149.62	62.5472	0.778201	19.3833	2.34731	0.206748	0.579038	1.68104	7.36994	5.05338	0.0539164
DC-07_tr1 129	2166.55	62.2888	0.812894	19.7131	2.33377	0.181228	0.60967	1.71418	7.31109	4.97732	0.0579311
DC-07_tr1 130	2183.48	62.6653	0.769266	19.211	2.36142	0.202113	0.606545	1.77364	7.36268	4.93939	0.108584
DC-07_tr1 131	2200.41	62.5343	0.797323	19.0835	2.37249	0.271749	0.660361	1.7716	7.449	4.98327	0.0763549
DC-07_tr1 132	2217.35	62.3702	0.81386	19.2629	2.39885	0.239268	0.596213	1.73994	7.52602	4.96244	0.0902916
DC-07_tr1 133	2234.26	62.5343	0.782194	19.3048	2.29966	0.271422	0.625755	1.70154	7.36304	5.00151	0.115808
DC-07_tr1 134	2251.2	62.1844	0.803901	19.4443	2.37329	0.215574	0.59655	1.73833	7.51542	5.05886	0.0693251
DC-07_tr1 135	2268.13	62.3082	0.810583	19.2447	2.43134	0.250551	0.650795	1.73078	7.50006	4.93479	0.138257
DC-07_tr1 136	2285.06	62.0901	0.826941	19.4399	2.39006	0.227571	0.60586	1.72043	7.57196	5.05828	0.0689203
DC-07_tr1 137	2302	62.6047	0.750103	19.2368	2.33892	0.214521	0.639751	1.68979	7.47011	4.93543	0.119831
DC-07_tr1 138	2318.93	62.2801	0.835958	19.359	2.33965	0.229617	0.620731	1.6978	7.49515	5.07268	0.0692577
DC-07_tr1 139	2335.86	62.4675	0.787207	19.2431	2.3071	0.242401	0.60657	1.68635	7.60411	4.92457	0.13108
DC-07_tr1 140	2352.68	61.9602	0.807442	19.5572	2.40212	0.237944	0.612283	1.71138	7.54657	5.10321	0.0616509
DC-07_tr1 141	2369.61	62.1877	0.76204	19.5379	2.33087	0.223764	0.591938	1.71967	7.56238	5.00361	0.080182
DC-07_tr1 142	2386.55	62.3363	0.789662	19.4361	2.29878	0.22118	0.617667	1.66713	7.51763	5.04282	0.0727947
DC-07_tr1 143	2403.48	62.4172	0.73823	19.4363	2.38438	0.217072	0.605798	1.69281	7.42152	4.99585	0.0908336
DC-07_tr1 144	2420.41	62.6808	0.778092	19.0998	2.29156	0.204788	0.607418	1.66941	7.48644	5.10156	0.0801526
DC-07_tr1 145	2437.35	62.2882	0.820077	19.388	2.37298	0.212947	0.598426	1.63725	7.58525	5.05683	0.0401023
DC-07_tr1 146	2454.28	62.3014	0.78757	19.3345	2.2576	0.233009	0.612968	1.72944	7.58055	5.0537	0.109255
DC-07_tr1 147	2471.2	62.3294	0.762398	19.5898	2.39728	0.223164	0.638933	1.6462	7.32561	5.00034	0.0868373
DC-07_tr1 148	2488.13	62.2758	0.789139	19.4267	2.30998	0.237657	0.640239	1.66485	7.51263	5.0882	0.054836
DC-07_tr1 149	2505.06	62.3493	0.789689	19.2763	2.25508	0.194101	0.618756	1.69903	7.589	5.13828	0.090512
DC-07_tr1 150	2522	62.3805	0.830225	19.2775	2.41873	0.229469	0.617604	1.67451	7.46293	5.00285	0.105639
Transect 2
DC-07_tr2 001	0	48.4188	3.44349	16.3251	9.07065	0.23737	5.11274	8.60872	5.72165	2.26766	0.793892
DC-07_tr2 001	43.6683	48.425	3.44919	16.6274	8.81694	0.249097	5.12661	8.59678	5.68226	2.26452	0.762178
DC-07_tr2 001	87.4122	48.1462	3.51447	16.5473	9.07905	0.194133	5.07297	8.7548	5.6378	2.26976	0.783539
DC-07_tr2 001	131.081	48.0072	3.51323	16.4722	9.09865	0.245085	5.11207	8.82516	5.71164	2.24048	0.774279
DC-07_tr2 001	174.749	48.3227	3.5056	16.5519	9.06838	0.22566	5.12196	8.59607	5.5208	2.23561	0.851315
DC-07_tr2 001	218.493	48.2945	3.49976	16.5976	8.938	0.213548	5.04007	8.51887	5.73164	2.29475	0.871167
DC-07_tr2 001	262.161	48.5193	3.45671	16.469	8.9603	0.213982	5.06497	8.54257	5.68112	2.28707	0.804965
DC-07_tr2 001	305.829	48.1113	3.47995	16.4983	9.1401	0.246636	5.10462	8.53215	5.63919	2.29551	0.952268
DC-07_tr2 001	349.573	48.0428	3.53318	16.5265	9.11518	0.211782	5.11161	8.46708	5.54019	2.4565	0.995143
DC-07_tr2 001	393.242	48.5326	3.54321	16.3072	9.10511	0.2332	5.0362	8.61096	5.66704	2.22897	0.735559
DC-07_tr2 001	436.91	48.0642	3.41383	16.4238	9.45048	0.208473	5.07911	8.64906	5.63074	2.31058	0.769673
DC-07_tr2 001	480.676	48.2631	3.45634	16.5486	9.00744	0.209685	5.10073	8.55707	5.7501	2.30423	0.80271
DC-07_tr2 001	524.322	48.1463	3.48007	16.5539	9.06074	0.215284	5.07903	8.5591	5.70607	2.2887	0.910881
DC-07_tr2 001	567.99	48.6312	3.4391	16.5119	8.75026	0.286697	5.05874	8.51888	5.73184	2.31377	0.757549
DC-07_tr2 001	611.756	48.4327	3.35433	16.5088	8.99044	0.245108	5.12087	8.60138	5.66766	2.23972	0.839003
DC-07_tr2 001	655.403	48.2669	3.49018	16.5627	9.0494	0.181197	5.12033	8.53736	5.71596	2.29892	0.777036
DC-07_tr2 001	699.071	48.2874	3.59188	16.5851	9.04737	0.21645	5.01822	8.53722	5.72618	2.2176	0.772618
DC-07_tr2 001	742.837	48	3.4696	16.2451	9.31737	0.200019	5.29631	8.59358	5.79033	2.29775	0.789966
DC-07_tr2 001	786.483	48.155	3.44114	16.5886	8.93232	0.237637	5.06234	8.72313	5.63761	2.30107	0.921158
DC-07_tr2 001	830.151	48.293	3.41879	16.5486	9.0818	0.257143	5.06526	8.52599	5.66302	2.29667	0.849767
DC-07_tr2 001	873.917	48.3087	3.47764	16.5162	9.03556	0.249108	5.02209	8.48922	5.84159	2.25889	0.801013
DC-07_tr2 001	917.564	47.9766	3.43442	16.6348	9.17602	0.185838	5.15164	8.60713	5.7732	2.29664	0.763685
DC-07_tr2 001	961.232	48.2733	3.42408	16.5427	9.15889	0.213532	5.10461	8.5497	5.6823	2.33174	0.719162
DC-07_tr2 001	1005	48.4196	3.49008	16.5464	9.07211	0.175976	5.15102	8.49393	5.6451	2.20758	0.798199
DC-07_tr2 001	1048.64	48.608	3.43714	16.3795	8.82624	0.22055	5.1451	8.49738	5.76039	2.28082	0.844964
DC-07_tr2 001	1136.08	48.2318	3.51504	16.5754	9.01913	0.208166	5.01999	8.5666	5.70405	2.32582	0.833928
DC-07_tr2 001	1179.72	48.4618	3.4353	16.3781	8.9927	0.223137	5.02163	8.56198	5.76752	2.33222	0.825627
DC-07_tr2 001	1223.39	48.2605	3.53177	16.5899	9.17002	0.185077	5.05137	8.40498	5.73257	2.28465	0.789146
DC-07_tr2 001	1267.16	48.2696	3.51147	16.6769	8.9621	0.21226	5.03136	8.46945	5.82799	2.29556	0.743383
DC-07_tr2 001	1310.83	48.3948	3.53009	16.4039	9.01902	0.234432	5.0385	8.45337	5.64605	2.34641	0.933432
DC-07_tr2 001	1354.47	48.1436	3.53858	16.5589	9.0932	0.196984	5.01911	8.58919	5.69113	2.37305	0.796338
DC-07_tr2 001	1398.24	48.7806	3.51137	16.516	8.73636	0.202271	4.96217	8.50507	5.65603	2.30236	0.827694
DC-07_tr2 001	1441.91	48.4273	3.41495	16.6662	8.84116	0.245122	5.091	8.33834	5.67762	2.35694	0.941311
DC-07_tr2 001	1485.55	48.3032	3.47649	16.5842	9.08508	0.237157	5.05194	8.46541	5.74513	2.30015	0.751174
DC-07_tr2 001	1529.32	48.4517	3.52778	16.4279	8.89844	0.317395	5.08633	8.43509	5.7287	2.37994	0.746732
DC-07_tr2 001	1572.99	48.4005	3.52061	16.3494	9.02613	0.243204	5.01452	8.51423	5.76669	2.3819	0.782787
DC-07_tr2 001	1616.63	48.5166	3.43332	16.5595	8.74032	0.275294	5.03484	8.34255	5.80943	2.32377	0.964366
DC-07_tr2 001	1660.4	48.7685	3.46248	16.4415	8.80308	0.280985	4.96288	8.39388	5.77079	2.36078	0.755135
DC-07_tr2 001	1704.07	48.408	3.54384	16.4715	8.95396	0.244085	4.99073	8.32488	5.74563	2.43246	0.884911
DC-07_tr2 001	1747.71	48.6845	3.47972	16.6816	8.77312	0.245373	4.87161	8.36188	5.75736	2.38308	0.761743
DC-07_tr2 001	1791.48	48.1292	3.52982	16.5179	9.08118	0.219121	5.11144	8.35845	5.92843	2.32528	0.799186
DC-07_tr2 001	1878.8	48.4089	3.42179	16.6471	8.82738	0.271329	4.95425	8.43901	5.78345	2.37216	0.874655
DC-07_tr2 001	1922.56	48.5147	3.5081	16.8578	8.6127	0.211326	4.97856	8.31861	5.75581	2.38425	0.858119
DC-07_tr2 001	2009.88	48.7219	3.53899	16.6069	8.60979	0.232728	4.94403	8.29286	5.78916	2.47201	0.791678
DC-07_tr2 001	2053.64	48.386	3.571	16.7482	8.84396	0.239319	4.82398	8.28012	5.84724	2.4642	0.796061
DC-07_tr2 001	2097.31	48.7156	3.52136	16.5233	8.83465	0.242328	4.8028	8.16788	5.9488	2.42744	0.815851
DC-07_tr2 001	2140.96	48.6899	3.4853	16.6439	8.74456	0.293225	4.8836	8.26455	5.73927	2.42093	0.834803
DC-07_tr2 001	2184.72	48.8117	3.51284	16.5861	8.719	0.265987	4.78546	8.06692	5.87928	2.53472	0.838034
DC-07_tr2 001	2228.39	48.9938	3.57137	16.7362	8.41001	0.245178	4.74437	8.06439	5.91738	2.53452	0.782769
DC-07_tr2 001	2272.06	48.8666	3.55009	16.6833	8.47373	0.241216	4.79685	8.06167	5.89569	2.57804	0.852762
DC-07_tr2 001	2315.8	49.3518	3.45294	16.7383	8.17968	0.249917	4.58988	8.17968	5.96896	2.47391	0.814915
DC-07_tr2 001	2359.47	49.0791	3.52809	16.9495	8.27059	0.283713	4.6064	7.86229	5.96739	2.5754	0.87752
DC-07_tr2 001	2403.14	49.0136	3.46615	16.8007	8.67066	0.233514	4.66393	7.79088	5.96771	2.55456	0.838235
DC-07_tr2 001	2446.88	49.1868	3.43773	16.9161	8.46855	0.246825	4.59063	7.70345	6.03699	2.5783	0.834593
DC-07_tr2 001	2490.55	49.3131	3.49984	16.9317	8.27139	0.238998	4.5088	7.60926	6.06429	2.65904	0.903652
DC-07_tr2 001	2534.22	49.7358	3.50742	16.8209	8.16291	0.209708	4.45537	7.63627	5.98263	2.61213	0.876855
DC-07_tr2 001	2577.96	49.9003	3.44612	16.7627	7.93064	0.270897	4.45029	7.54267	6.03641	2.85275	0.807214
DC-07_tr2 001	2621.63	50.084	3.26839	16.9077	7.9091	0.209827	4.43119	7.44817	6.11776	2.79699	0.826946
DC-07_tr2 001	2665.3	50.3775	3.24881	16.5899	7.98578	0.218194	4.28633	7.32554	6.21466	2.79817	0.95515
DC-07_tr2 001	2709.04	50.368	3.2835	16.849	7.73516	0.23216	4.18857	7.32473	6.25128	2.90463	0.862971
DC-07_tr2 001	2752.71	50.9348	3.1598	17.0902	7.58983	0.25058	4.0836	7.00196	6.22513	2.87637	0.787746
DC-07_tr2 001	2796.38	50.9595	3.09098	17.2093	7.49772	0.22347	4.05169	7.00693	6.38037	2.9239	0.656207
DC-07_tr2 001	2840.12	51.6062	3.00109	17.209	7.15645	0.279017	3.88253	6.90461	6.35895	2.92764	0.674511
DC-07_tr2 001	2883.79	52	2.74505	17.2605	7.11218	0.195689	3.75365	6.73785	6.40512	3.04659	0.743347
DC-07_tr2 001	2927.46	52.3405	2.77802	17.2258	7.07133	0.243077	3.54619	6.51362	6.48205	3.11475	0.684614
DC-07_tr2 001	2971.21	53.2565	2.54996	17.3585	6.69887	0.210999	3.46962	6.21814	6.4794	3.20835	0.5496
DC-07_tr2 001	3014.87	53.3214	2.43838	17.746	6.47109	0.219871	3.29286	5.91881	6.66908	3.32412	0.598445
DC-07_tr2 001	3058.54	53.713	2.33444	17.7019	6.32287	0.21973	3.19284	5.76805	6.80441	3.41267	0.530116
DC-07_tr2 001	3102.21	54.456	2.19251	17.7184	6.04251	0.178653	3.02126	5.60191	6.85028	3.50382	0.43462
DC-07_tr2 001	3145.95	55.6144	1.97392	17.6713	5.56667	0.229873	2.91388	5.21157	6.86173	3.65541	0.301206
DC-07_tr2 001	3189.62	56.2683	1.78562	17.9094	5.30372	0.15486	2.7422	4.95297	6.82362	3.7413	0.318011
DC-07_tr2 001	3277.03	57.8721	1.37257	17.8873	4.91543	0.174465	2.27036	4.39744	6.93231	3.93455	0.243457
DC-07_tr2 001	3320.7	58.3401	1.24485	18.0474	4.68095	0.142039	2.15796	4.12267	7.02142	4.09046	0.152131
DC-07_tr2 001	3364.37	59.1553	1.13425	18.1807	4.01691	0.132642	2.0503	3.95415	7.0819	4.16336	0.130445
DC-07_tr2 001	3408.12	59.6458	1.0663	18.2286	4.00778	0.123163	1.82077	3.61014	7.1261	4.25892	0.11249
DC-07_tr2 001	3451.78	59.9825	0.981761	18.2939	3.77842	0.181889	1.69273	3.43207	7.1895	4.38717	0.0800816
DC-07_tr2 001	3495.45	60.2363	0.939005	18.4145	3.53041	0.177461	1.5467	3.18572	7.37417	4.51224	0.0834555
DC-07_tr2 001	3539.2	60.9508	0.845793	18.7966	3.12408	0.184113	1.38636	2.86374	7.24787	4.48826	0.112363
DC-07_tr2 001	3582.86	61.0994	0.791072	18.5705	3.25141	0.218532	1.24742	2.78246	7.35735	4.61658	0.0652366
DC-07_tr2 001	3626.53	61.4113	0.818123	18.7434	2.91889	0.170234	1.15525	2.60615	7.39104	4.69107	0.0944469
DC-07_tr2 001	3670.28	61.9261	0.72268	18.582	2.88612	0.111471	1.01255	2.49921	7.44535	4.71609	0.0984
DC-07_tr2 001	3713.94	61.7543	0.802691	18.8598	2.67633	0.156503	0.973725	2.46724	7.43309	4.85085	0.0255088
DC-07_tr2 001	3757.61	61.8647	0.764297	18.8802	2.72702	0.136246	0.88205	2.35088	7.51236	4.81669	0.0656156
DC-07_tr2 001	3845.02	62.2721	0.780208	18.9633	2.42931	0.196021	0.772354	2.12565	7.43454	4.9424	0.0840836
DC-07_tr2 001	3888.69	62.2442	0.762074	19.1223	2.50648	0.171694	0.70714	2.06784	7.42544	4.89808	0.094724
DC-07_tr2 001	3932.46	62.2318	0.721722	18.9451	2.51631	0.218253	0.691464	2.10039	7.47613	5.01182	0.0870309
DC-07_tr2 001	3976.11	62.4141	0.797306	19.0451	2.34959	0.192625	0.655296	2.00802	7.49383	4.96829	0.0758699
DC-07_tr2 001	4019.77	62.5658	0.759809	18.99	2.36984	0.201384	0.649565	1.97312	7.45402	4.93803	0.0984474
DC-07_tr2 001	4063.54	62.5085	0.775845	19.0043	2.22536	0.209685	0.662906	1.93282	7.51188	5.07757	0.0911038
DC-07_tr2 001	4107.19	62.4194	0.801554	19.037	2.38353	0.2268	0.614722	1.8527	7.53571	5.03768	0.0908657
DC-07_tr2 001	4150.85	62.3313	0.802458	19.1324	2.32129	0.227965	0.638407	1.89451	7.47393	5.00691	0.170818
DC-07_tr2 001	4194.62	62.3616	0.797959	18.9009	2.49655	0.241957	0.630378	1.85161	7.52085	5.0347	0.16342
DC-07_tr2 001	4238.27	62.525	0.724502	19.0362	2.36908	0.233256	0.627233	1.81595	7.54559	5.07214	0.0510345
DC-07_tr2 001	4281.93	62.4991	0.836066	19.0228	2.3557	0.254333	0.635206	1.84495	7.47362	5.03453	0.0436743
DC-07_tr2 001	4325.7	62.5578	0.704704	18.9652	2.44914	0.219481	0.617833	1.75836	7.59863	5.04482	0.0840454
DC-07_tr2 001	4369.35	62.6834	0.785349	18.9296	2.34526	0.183014	0.641073	1.80083	7.55928	5.0465	0.0256513
DC-07_tr2 001	4413.02	62.2471	0.786263	19.2336	2.36657	0.210812	0.644476	1.77493	7.60833	5.04454	0.0833491
DC-07_tr2 001	4500.43	62.5437	0.786787	19.2018	2.40153	0.213539	0.608387	1.70498	7.48529	4.94861	0.105314
DC-07_tr2 001	4544.1	62.4855	0.833036	19.016	2.32592	0.238983	0.597929	1.74968	7.63782	4.98711	0.12803
DC-07_tr2 001	4587.86	62.6726	0.819186	19.0683	2.22673	0.214728	0.631534	1.73539	7.44335	5.04935	0.138831
DC-07_tr2 001	4631.51	62.2728	0.804708	19.1969	2.42432	0.226617	0.599317	1.7272	7.5747	5.04633	0.127147
DC-07_tr2 001	4675.18	62.3238	0.851939	19.0585	2.40189	0.21429	0.644541	1.69176	7.6756	5.06485	0.0728921
DC-07_tr2 001	4718.94	62.4584	0.764444	19.2204	2.3206	0.234973	0.586601	1.64419	7.60698	5.11988	0.0436022
DC-07_tr2 001	4762.59	62.4804	0.757719	18.9639	2.43852	0.222083	0.623653	1.70591	7.62952	5.07588	0.102355
DC-07_tr2 001	4806.26	62.4664	0.790533	18.8658	2.37254	0.234236	0.612801	1.73778	7.75237	5.10928	0.0582728
DC-07_tr2 001	4850.02	62.3175	0.768378	19.121	2.30035	0.209217	0.608291	1.71745	7.74415	5.08991	0.123761
DC-07_tr2 001	4893.69	62.4692	0.783072	19.151	2.39907	0.226509	0.5899	1.69285	7.63339	4.9643	0.0907698
DC-07_tr2 001	4937.34	62.5459	0.788689	19.0799	2.40441	0.215361	0.595403	1.67894	7.50343	5.13011	0.0579339
DC-07_tr2 001	4981.1	62.3092	0.772617	19.176	2.48865	0.233375	0.621233	1.69352	7.63117	4.98762	0.086638
DC-07_tr2 001	5024.77	62.9049	0.828432	18.5917	2.38007	0.262956	0.61955	1.67023	7.64129	5.03156	0.0693144
DC-07_tr2 001	5112.18	62.4217	0.803573	19.0981	2.38726	0.214335	0.597957	1.65032	7.66	5.1378	0.0289585
DC-07_tr2 001	5155.85	62.6176	0.78858	19.053	2.22928	0.204281	0.627531	1.70842	7.64621	5.05233	0.0727119
DC-07_tr2 001	5199.5	62.4926	0.782538	19.024	2.27246	0.182005	0.609707	1.63659	7.76597	5.12866	0.105492
DC-07_tr2 001	5243.26	62.5254	0.722576	18.9127	2.33156	0.252517	0.655544	1.64458	7.7233	5.16275	0.0690101
DC-07_tr2 001	5286.93	62.9187	0.800055	18.8756	2.39195	0.207476	0.602459	1.60157	7.40464	5.09589	0.10171
DC-07_tr2 001	5330.58	62.4777	0.81909	19.0078	2.37597	0.249683	0.63645	1.66318	7.63409	5.09284	0.043284
DC-07_tr2 001	5374.34	62.5709	0.749179	18.9697	2.42345	0.161076	0.621322	1.67134	7.65684	5.05581	0.120337
DC-07_tr2 001	5418.01	62.3714	0.816064	19.0798	2.33841	0.215837	0.622162	1.65551	7.77056	5.01827	0.111954
DC-07_tr2 001	5461.66	62.3523	0.790197	19.0025	2.43888	0.251672	0.626948	1.65014	7.67988	5.10608	0.101395
DC-07_tr2 001	5505.43	62.5091	0.814356	19.0403	2.26497	0.252043	0.601924	1.63409	7.70504	5.09877	0.0794292
DC-07_tr2 001	5549.09	62.602	0.747891	19.0827	2.26034	0.214888	0.610083	1.62494	7.7289	5.05191	0.0763515
DC-07_tr2 001	5592.74	62.4744	0.785717	18.9796	2.45569	0.232146	0.612258	1.63366	7.66883	5.07787	0.07981
DC-07_tr2 001	5636.51	62.5936	0.813167	18.9926	2.30024	0.185574	0.629459	1.61639	7.62603	5.08748	0.155526
DC-07_tr2 001	5680.17	62.4554	0.843242	19.0946	2.34496	0.202881	0.63073	1.58075	7.68392	5.10865	0.0548552
DC-07_tr2 001	5723.84	62.5801	0.777835	18.9549	2.39014	0.186327	0.657185	1.58996	7.75237	5.07126	0.039905
DC-07_tr2 001	5767.59	62.1351	0.843824	19.3279	2.31894	0.234689	0.599507	1.64603	7.7643	5.01056	0.119156
DC-07_tr2 001	5811.25	62.2037	0.907106	19.282	2.26725	0.262917	0.621517	1.66403	7.62335	5.1065	0.0616732
DC-07_tr2 001	5854.92	62.3043	0.823151	19.1642	2.26129	0.241101	0.621494	1.62111	7.74415	5.11114	0.108108
DC-07_tr2 001	5898.67	62.3893	0.768537	19.1306	2.36934	0.201756	0.626686	1.63474	7.71848	5.05943	0.101085
DC-07_tr2 001	5942.34	61.9989	0.822244	19.3062	2.54111	0.207214	0.616683	1.59077	7.71629	5.09254	0.108049
DC-07_tr2 001	5986	62.5951	0.786376	18.9214	2.4408	0.190362	0.593615	1.61677	7.63532	5.11108	0.10921
DC-07_tr2 001	6029.75	62.5821	0.767794	19.0472	2.29022	0.208918	0.61981	1.60626	7.66861	5.12968	0.0794841
DC-07_tr2 001	6073.42	62.3115	0.762124	19.1124	2.44581	0.235087	0.600514	1.63054	7.66767	5.10834	0.126006

## Sheet: DCB-01
Experiment	DCB-01
Comment	Distance (µm)	SiO2	TiO2	Al2O3	FeO	MnO	MgO	CaO	Na2O	K2O	P2O5
Transect 2
DCB-01_tr1 001	0	47.9442	3.40504	15.7889	9.84017	0.212815	5.01636	9.19159	5.54333	2.31056	0.747082
DCB-01_tr1 002	13.1309	47.8349	3.52159	15.7561	9.64388	0.242362	5.12047	9.14803	5.58596	2.39832	0.748438
DCB-01_tr1 003	26.2618	48.0137	3.47852	15.5677	9.82053	0.182496	5.05142	9.21557	5.57572	2.28877	0.805606
DCB-01_tr1 004	39.3539	47.7185	3.40774	15.6675	10.1022	0.219588	5.04104	9.18477	5.58547	2.34912	0.723994
DCB-01_tr1 005	52.4848	48.0854	3.392	15.5728	10.014	0.177903	5.01206	9.07233	5.58921	2.39971	0.684576
DCB-01_tr1 006	65.6156	47.7543	3.44002	15.7185	9.88371	0.221014	5.04333	9.10235	5.67248	2.40497	0.759239
DCB-01_tr1 007	78.6543	48.0072	3.39077	15.8	9.83829	0.204458	5.02036	9.02855	5.68839	2.32799	0.694044
DCB-01_tr1 008	91.7852	47.7236	3.50283	15.6818	9.91119	0.238719	5.07202	9.15191	5.62883	2.34872	0.740454
DCB-01_tr1 009	104.916	47.9398	3.4322	15.7074	9.85245	0.198563	4.98679	9.12563	5.58238	2.40254	0.772246
DCB-01_tr1 010	118.008	47.9411	3.48385	15.7129	9.77104	0.2264	5.03788	9.07021	5.68792	2.36658	0.702154
DCB-01_tr1 011	131.139	47.9459	3.4542	15.3677	9.97992	0.222559	5.08563	9.0635	5.79057	2.40686	0.683186
DCB-01_tr1 012	144.27	47.5822	3.46419	15.7097	10.1307	0.228898	5.01501	9.01293	5.6998	2.36652	0.790016
DCB-01_tr1 013	157.401	47.8964	3.44943	15.5123	10.115	0.24562	5.00168	8.96853	5.65098	2.37402	0.786065
DCB-01_tr1 014	170.532	48.1028	3.53503	15.5886	9.74413	0.234386	5.01387	8.93381	5.71278	2.43097	0.703664
DCB-01_tr1 015	183.663	47.8932	3.45204	15.8328	9.76896	0.256929	4.98065	8.93885	5.62854	2.4802	0.76785
DCB-01_tr1 016	196.755	48.1405	3.34688	15.612	9.72719	0.238529	4.96471	8.92839	5.83429	2.41663	0.790815
DCB-01_tr1 017	209.886	47.9103	3.45817	15.5971	9.94098	0.255884	4.93016	8.85211	5.81739	2.41971	0.818266
DCB-01_tr1 018	223.016	48.1144	3.46125	15.621	9.87919	0.214234	4.92446	8.8499	5.82257	2.42186	0.69114
DCB-01_tr1 019	236.055	48.1208	3.39462	15.4374	10.1131	0.21762	4.91008	8.84016	5.81935	2.44494	0.701858
DCB-01_tr1 020	249.186	47.8237	3.57636	15.5856	9.98739	0.247602	4.94798	8.9409	5.79126	2.43843	0.660814
DCB-01_tr1 021	262.317	48.222	3.47952	15.5425	9.8269	0.208671	4.92348	8.78404	5.85603	2.42664	0.730199
DCB-01_tr1 022	275.409	48.2063	3.49364	15.5553	9.73589	0.217875	4.78237	8.73915	5.92007	2.47676	0.872706
DCB-01_tr1 023	288.54	48.6738	3.52431	15.7534	9.48231	0.227111	4.69571	8.48258	5.88731	2.53468	0.738792
DCB-01_tr1 024	301.671	48.9293	3.3317	15.6427	9.47707	0.205997	4.69282	8.40036	5.97268	2.60035	0.746992
DCB-01_tr1 025	314.802	48.9398	3.27482	15.7861	9.15531	0.208859	4.63342	8.38476	6.01229	2.80844	0.796198
DCB-01_tr1 026	327.932	49.367	3.28097	15.836	9.03029	0.240435	4.54054	8.28877	6.08453	2.65119	0.680269
DCB-01_tr1 027	341.063	49.4403	3.0787	16.0978	9.09524	0.233921	4.43695	8.00864	6.11715	2.79699	0.694417
DCB-01_tr1 028	354.155	50.2284	3.004	16.1427	8.5973	0.169013	4.28853	7.72745	6.26085	2.97365	0.608082
DCB-01_tr1 029	367.286	51.0295	2.75426	16.2834	8.12154	0.245563	4.00528	7.4355	6.47706	3.07711	0.570728
DCB-01_tr1 030	380.417	52.297	2.53751	16.5191	7.65297	0.207752	3.74056	6.90486	6.42971	3.21486	0.495674
DCB-01_tr1 031	393.456	53.4394	2.27979	16.5008	7.23104	0.179872	3.45483	6.39746	6.5682	3.45483	0.49372
DCB-01_tr1 032	406.587	54.8283	1.92873	16.7157	6.66016	0.211056	3.06387	5.70584	6.81084	3.79719	0.27836
DCB-01_tr1 033	419.718	56.8073	1.53648	16.9849	5.82252	0.124093	2.57438	4.94763	6.91864	4.10291	0.181212
DCB-01_tr1 034	432.81	58.7481	1.14944	17.1369	5.055	0.177876	2.06204	4.01397	7.19712	4.38434	0.0751743
DCB-01_tr1 035	445.941	60.298	0.830647	17.2136	4.3034	0.1417	1.61765	3.45683	7.38733	4.72668	0.0241877
DCB-01_tr1 036	459.072	59.375	0.763432	17.1735	4.95362	0.148472	1.40918	3.09259	7.9641	5.02204	0.0981145
DCB-01_tr1 037	472.202	60.6422	0.813928	17.4879	5.19852	0.179664	0.920943	2.83852	6.47096	5.36166	0.0856995
DCB-01_tr1 038	485.333	62.0275	0.781509	17.8206	3.50421	0.141866	0.839713	2.41601	7.25801	5.13152	0.0790694
DCB-01_tr1 039	498.464	61.9334	0.769864	17.6607	3.52409	0.116194	0.759191	2.41652	7.46101	5.28614	0.0727977
DCB-01_tr1 040	511.556	61.6459	0.822147	17.9951	3.50855	0.164369	0.670947	2.29212	7.44938	5.36838	0.083039
DCB-01_tr1 041	524.687	61.7479	0.746092	17.628	3.59755	0.187872	0.670443	2.25846	7.70475	5.37634	0.0825438
DCB-01_tr1 042	537.818	61.7764	0.756882	17.8938	3.49811	0.188313	0.625628	2.13717	7.70189	5.37318	0.0485905
DCB-01_tr1 043	550.857	61.9631	0.768584	17.9507	3.2062	0.207348	0.600937	2.08051	7.70895	5.43748	0.076185
DCB-01_tr1 044	563.988	61.9938	0.764547	17.7511	3.3402	0.198812	0.624538	1.99012	7.81048	5.44033	0.0861053
DCB-01_tr1 045	577.118	61.7727	0.78376	17.7383	3.43517	0.255126	0.628173	2.05909	7.78437	5.47417	0.0691051
DCB-01_tr1 046	590.211	61.7661	0.808547	18.0717	3.23177	0.241829	0.587156	1.98336	7.71196	5.49703	0.100477
DCB-01_tr1 047	603.341	61.7552	0.78746	17.7781	3.45797	0.241659	0.626919	1.93327	7.78292	5.55069	0.0858015
DCB-01_tr1 048	616.472	61.8383	0.791722	17.9412	3.37517	0.211471	0.596778	1.93151	7.7161	5.52573	0.0719838
DCB-01_tr1 049	629.603	61.8494	0.738771	17.6613	3.33212	0.238452	0.616493	1.90121	8.01511	5.53352	0.113672
DCB-01_tr1 050	642.734	61.6933	0.775128	17.886	3.38059	0.182171	0.613021	1.84578	8.02514	5.55741	0.0414298
DCB-01_tr1 051	655.865	61.7642	0.776347	17.799	3.24441	0.233738	0.624674	1.91852	8.04572	5.53457	0.0587609
DCB-01_tr1 052	668.957	61.7144	0.721078	17.8806	3.20883	0.244597	0.607155	1.84659	8.11289	5.57004	0.0937422
DCB-01_tr1 053	682.088	61.5769	0.800971	17.9386	3.24881	0.163744	0.611758	1.76478	8.20224	5.58514	0.10699
DCB-01_tr1 054	695.219	61.4717	0.756258	17.946	3.21001	0.245265	0.61883	1.90594	8.17549	5.57739	0.0931906
DCB-01_tr1 055	708.257	61.7713	0.811523	17.7785	3.23521	0.189375	0.60713	1.79398	8.15352	5.59358	0.0659135
DCB-01_tr1 056	721.388	61.9412	0.791196	17.5922	3.28025	0.233857	0.582472	1.7461	8.15521	5.62184	0.0556129
DCB-01_tr1 057	734.519	62.0075	0.788326	17.7726	3.1654	0.249704	0.578744	1.72383	8.11512	5.58481	0.0139116
DCB-01_tr1 058	747.611	61.7343	0.750598	17.7573	3.36897	0.233321	0.575532	1.73462	8.23191	5.55479	0.0586561
DCB-01_tr1 059	760.742	61.7493	0.811892	17.8912	3.13775	0.187963	0.615783	1.6795	8.28687	5.60168	0.0381156
DCB-01_tr1 060	773.873	61.5351	0.770692	17.6688	3.4175	0.226798	0.577367	1.73381	8.22806	5.76265	0.079274

## Sheet: DCB-02
Experiment	DCB-02
Label	Distance (µm)	SiO2	TiO2	Al2O3	FeO	MnO	MgO	CaO	Na2O	K2O	P2O5
Transect 1
DCB-02_tr1 001	0	47.8937	3.41149	15.5151	9.77484	0.249938	4.95381	8.9475	6.08757	2.51266	0.653392
DCB-02_tr1 002	13.9004	47.794	3.45364	15.4553	9.85453	0.233653	4.97284	8.88224	6.10718	2.50161	0.745015
DCB-02_tr1 003	27.9002	48.0484	3.39368	15.4185	9.78596	0.240192	4.88285	8.97552	6.01745	2.48195	0.755524
DCB-02_tr1 004	41.8005	48.2034	3.47065	15.4555	9.62039	0.272679	4.84064	8.80854	6.04826	2.52687	0.752988
DCB-02_tr1 005	55.7004	47.9581	3.45323	15.4326	9.79942	0.211166	4.84878	9.01506	6.09153	2.54663	0.643583
DCB-02_tr1 006	69.6006	48.0726	3.40976	15.461	9.79162	0.250592	4.91617	9.05877	5.90347	2.41228	0.723786
DCB-02_tr1 007	83.601	48.3441	3.51704	15.3896	9.54481	0.220273	4.86897	8.8536	5.99727	2.54122	0.723128
DCB-02_tr1 008	97.5008	48.2631	3.42914	15.3903	9.54239	0.230752	4.89877	9.0219	6.0214	2.51062	0.691645
DCB-02_tr1 009	111.401	48.2059	3.40707	15.5752	9.47083	0.22876	4.92808	8.94355	5.94208	2.51474	0.783828
DCB-02_tr1 010	125.401	48.1816	3.46331	15.4884	9.77039	0.219072	4.8141	8.95788	5.91098	2.50861	0.685654
DCB-02_tr1 011	139.301	48.1209	3.37315	15.5002	9.63029	0.223993	4.85081	9.01884	6.00237	2.48655	0.792945
DCB-02_tr1 012	153.201	48.0267	3.46616	15.4244	9.69505	0.234781	4.90359	8.97123	6.03519	2.53845	0.704446
DCB-02_tr1 013	167.101	48.0578	3.45234	15.5406	9.64414	0.234433	4.96974	8.88035	5.91684	2.55616	0.747599
DCB-02_tr1 014	181.102	48.2562	3.55304	15.5967	9.61052	0.296867	4.8358	8.70444	5.93531	2.50444	0.706638
DCB-02_tr1 015	195.002	48.0012	3.39689	15.6196	9.72561	0.205835	4.82237	8.83595	6.02543	2.52745	0.839617
DCB-02_tr1 016	208.902	48.0793	3.47708	15.4639	9.6179	0.289859	4.86995	9.00788	5.97814	2.54173	0.674269
DCB-02_tr1 017	222.902	48.302	3.45305	15.5642	9.47298	0.268808	4.81798	8.95349	5.96899	2.45483	0.74368
DCB-02_tr1 018	236.802	48.3181	3.40568	15.4877	9.70011	0.231809	4.88553	8.68651	6.0613	2.50358	0.719653
DCB-02_tr1 019	250.702	48.1326	3.50371	15.5573	9.65307	0.245566	4.73971	8.95846	5.95528	2.53329	0.721069
DCB-02_tr1 020	264.602	48.2047	3.43152	15.3397	9.93711	0.234589	4.85111	8.76263	5.98473	2.58385	0.670066
DCB-02_tr1 021	278.603	48.0876	3.50428	15.5768	9.56081	0.247528	4.86143	8.7607	6.09704	2.52187	0.78188
DCB-02_tr1 022	292.502	48.0369	3.40594	15.7664	9.61142	0.244075	4.84108	8.71193	6.06399	2.53677	0.781547
DCB-02_tr1 023	306.403	48.193	3.46998	15.5691	9.54499	0.232824	4.78267	8.91408	5.96307	2.5745	0.755763
DCB-02_tr1 024	320.403	48.2022	3.46829	15.6832	9.44427	0.235601	4.7727	8.89825	6.00632	2.56836	0.720859
DCB-02_tr1 025	334.303	48.329	3.46365	15.4041	9.69214	0.246608	4.87139	8.69963	6.01581	2.6028	0.674804
DCB-02_tr1 026	348.203	48.4609	3.46946	15.4807	9.58668	0.180473	4.80856	8.71424	5.9549	2.60717	0.736906
DCB-02_tr1 027	362.103	48.4975	3.52709	15.4158	9.34476	0.238383	4.80414	8.74678	6.05078	2.56424	0.810521
DCB-02_tr1 028	376.103	48.2416	3.49782	15.3257	9.60385	0.306919	4.79181	8.76477	6.0757	2.65875	0.733026
DCB-02_tr1 029	390.003	48.4213	3.27609	15.5183	9.595	0.257523	4.70622	8.68216	6.14648	2.58639	0.810504
DCB-02_tr1 030	403.904	48.3736	3.3832	15.4792	9.84388	0.247829	4.6468	8.60066	6.03269	2.58835	0.803815
DCB-02_tr1 031	417.904	48.766	3.45138	15.4399	9.31873	0.211651	4.78118	8.66906	6.01961	2.60884	0.733723
DCB-02_tr1 032	431.804	48.3651	3.38536	15.5322	9.55984	0.225556	4.75971	8.60992	6.17449	2.5466	0.841185
DCB-02_tr1 033	445.704	48.232	3.50558	15.8053	9.49933	0.242973	4.68419	8.47183	6.10455	2.57882	0.875389
DCB-02_tr1 034	459.604	48.5413	3.52324	15.4982	9.35798	0.267196	4.77572	8.58408	6.05875	2.63734	0.756173
DCB-02_tr1 035	473.604	48.361	3.44206	15.7322	9.51629	0.248436	4.60629	8.55454	6.18559	2.62204	0.731539
DCB-02_tr1 036	487.504	48.2327	3.58747	15.915	9.19735	0.245432	4.61392	8.60791	6.17899	2.70331	0.717901
DCB-02_tr1 037	501.404	48.6482	3.40204	15.5161	9.45909	0.250964	4.67402	8.43948	6.21857	2.58434	0.807202
DCB-02_tr1 038	515.405	48.6754	3.6131	15.447	9.51991	0.251192	4.60772	8.38321	6.17069	2.60833	0.723432
DCB-02_tr1 039	529.305	48.622	3.42834	15.8611	9.31702	0.268923	4.61818	8.3591	6.14077	2.68217	0.702407
DCB-02_tr1 040	543.205	49.1295	3.34882	15.6008	9.41919	0.236643	4.50219	8.36699	6.01978	2.70131	0.674721
DCB-02_tr1 041	557.105	48.8154	3.3214	15.6116	9.48681	0.260024	4.56057	8.29842	6.16541	2.74244	0.737919
DCB-02_tr1 042	571.105	49.1686	3.41054	15.7027	9.09477	0.255486	4.52708	8.31318	6.1816	2.72031	0.625773
DCB-02_tr1 043	585.005	48.9163	3.3454	15.7887	9.10805	0.219185	4.56933	8.2615	6.20123	2.82523	0.765158
DCB-02_tr1 044	598.905	48.9972	3.24404	15.8835	9.33426	0.257789	4.49881	8.1917	6.19223	2.70336	0.69706
DCB-02_tr1 045	612.906	48.9515	3.31874	15.8146	9.33902	0.225735	4.38115	8.22603	6.23276	2.75213	0.758353
DCB-02_tr1 046	626.805	49.7897	3.16534	15.8853	9.00364	0.200941	4.31425	8.17128	6.07277	2.76674	0.630021
DCB-02_tr1 047	640.706	49.357	3.18236	15.7294	9.06061	0.244657	4.33774	8.23969	6.24311	2.83778	0.767619
DCB-02_tr1 048	654.606	49.7058	3.22026	15.7661	8.83793	0.232123	4.39865	8.04557	6.26782	2.82408	0.701752
DCB-02_tr1 049	668.606	49.4273	3.29043	15.8649	8.89934	0.24744	4.31299	8.08939	6.28725	2.81458	0.766416
DCB-02_tr1 050	682.506	49.7354	3.2146	15.9921	8.78456	0.238568	4.23559	7.87476	6.25735	2.93156	0.735517
DCB-02_tr1 051	696.406	50.0435	3.13279	16.0796	8.58729	0.242512	4.15678	7.79649	6.43794	2.87933	0.643692
DCB-02_tr1 052	710.406	50.173	3.0745	16.04	8.45487	0.194887	4.20721	7.65591	6.49286	3.0037	0.703089
DCB-02_tr1 053	724.306	50.5972	2.97704	15.8108	8.63091	0.228156	4.16535	7.61772	6.34184	2.97704	0.653948
DCB-02_tr1 054	738.207	51.1162	2.89384	16.1499	8.51725	0.254254	3.90479	7.44312	6.12888	2.9823	0.609476
DCB-02_tr1 055	752.107	51.0006	2.82664	16.2027	8.33858	0.27691	3.89672	7.35935	6.38013	3.00835	0.709991
DCB-02_tr1 056	766.107	50.9765	2.91958	16.2547	8.20311	0.266399	3.8591	7.26359	6.48571	3.11153	0.659785
DCB-02_tr1 057	780.007	51.2802	2.77163	16.2541	8.19306	0.248431	3.81734	7.20827	6.43668	3.17773	0.6125
DCB-02_tr1 058	793.907	51.8422	2.59716	16.1792	8.02391	0.209693	3.69868	7.00324	6.62933	3.23382	0.582795
DCB-02_tr1 059	807.907	51.984	2.62607	16.385	7.70584	0.236245	3.61972	6.92512	6.6615	3.29526	0.561208
DCB-02_tr1 060	821.807	52.3752	2.47971	16.2938	7.94111	0.198779	3.45353	6.60588	6.74643	3.39329	0.512307
DCB-02_tr1 061	835.707	52.9875	2.42223	16.4933	7.4878	0.191668	3.367	6.39227	6.64354	3.49766	0.51711
DCB-02_tr1 062	849.608	53.5585	2.3061	16.61	6.99958	0.202673	3.28137	6.2986	6.72528	3.56582	0.452077
DCB-02_tr1 063	863.608	54.3781	2.07404	16.6729	6.81615	0.199853	3.14127	5.89994	6.81615	3.66481	0.33678
DCB-02_tr1 064	877.508	54.8783	2.0724	16.6798	6.32786	0.214886	3.01806	5.73431	6.96165	3.78263	0.330075
DCB-02_tr1 065	891.408	55.4104	1.89713	16.7109	6.38768	0.170439	2.85579	5.30793	7.02342	3.93554	0.300816
DCB-02_tr1 066	905.408	56.411	1.69907	16.7996	6.08246	0.105865	2.624	5.02682	7.03755	3.97119	0.242393
DCB-02_tr1 067	919.308	57.0514	1.55919	16.7366	5.56206	0.176938	2.50897	4.77612	7.18433	4.232	0.212406
DCB-02_tr1 068	933.208	57.9594	1.39375	17.035	5.3121	0.13628	2.2579	4.41499	7.07609	4.28395	0.130535
DCB-02_tr1 069	947.108	58.5749	1.2008	17.0797	5.07776	0.192172	2.06723	4.11439	7.1751	4.42548	0.0924233
DCB-02_tr1 070	961.108	59.1644	1.08984	17.0218	4.80309	0.130628	1.98956	3.78821	7.33526	4.62222	0.0549642
DCB-02_tr1 071	975.009	59.8926	0.948777	16.95	4.57157	0.161663	1.74825	3.69745	7.23414	4.68209	0.113435
DCB-02_tr1 072	988.908	60.1641	0.918734	17.2603	4.30247	0.14177	1.58567	3.43593	7.33536	4.76597	0.0897776
DCB-02_tr1 073	1002.81	60.9154	0.796067	17.1815	4.07646	0.132963	1.43632	3.16051	7.36782	4.90182	0.0311019
DCB-02_tr1 074	1016.81	60.9905	0.754858	17.274	4.06269	0.0985077	1.28883	3.05956	7.46332	4.93542	0.0723259
DCB-02_tr1 075	1030.71	61.1459	0.739254	17.5432	3.89292	0.0960721	1.1968	2.84213	7.4656	5.04378	0.0344258
DCB-02_tr1 076	1044.61	61.2508	0.768185	17.6489	3.86359	0.131774	1.09633	2.78178	7.28415	5.08964	0.0848959
DCB-02_tr1 077	1058.61	61.6351	0.743811	17.7589	3.68935	0.139028	0.965693	2.66801	7.22238	5.12757	0.0501293
DCB-02_tr1 078	1072.51	61.4664	0.745234	17.7115	3.58663	0.132282	0.907237	2.5993	7.49566	5.26913	0.0865427
DCB-02_tr1 079	1086.41	61.919	0.775419	17.572	3.61688	0.17572	0.852177	2.39116	7.4347	5.20429	0.0586738
DCB-02_tr1 080	1100.31	61.7229	0.781884	17.7614	3.54626	0.156417	0.815438	2.4211	7.41399	5.29427	0.0862956
DCB-02_tr1 081	1114.31	61.6927	0.751188	17.8385	3.69519	0.148704	0.71334	2.33066	7.47005	5.31868	0.0410355
DCB-02_tr1 082	1128.21	61.7753	0.803813	17.8123	3.49615	0.142458	0.730575	2.31067	7.5348	5.31455	0.0793666
DCB-02_tr1 083	1142.11	61.9235	0.759479	17.8006	3.66513	0.0828945	0.711923	2.1809	7.41103	5.39167	0.0728987
DCB-02_tr1 084	1156.11	61.9338	0.818267	17.8392	3.4128	0.162184	0.663432	2.19466	7.49004	5.40612	0.0795313
DCB-02_tr1 085	1170.01	61.8579	0.776944	17.948	3.51922	0.112615	0.65176	2.13164	7.5613	5.40955	0.0310697
DCB-02_tr1 086	1183.91	61.8043	0.771505	17.9622	3.46463	0.183116	0.651591	2.11672	7.52834	5.4216	0.0960512
DCB-02_tr1 087	1197.81	61.4347	0.83362	18.1309	3.46591	0.172995	0.61044	2.10358	7.69311	5.48935	0.0654115
DCB-02_tr1 088	1211.81	62.1137	0.79663	18.0401	3.36562	0.153857	0.571955	1.99333	7.4324	5.42906	0.103373
DCB-02_tr1 089	1225.71	61.703	0.804309	18.0619	3.43075	0.207661	0.630552	1.99791	7.57792	5.49929	0.0866769
DCB-02_tr1 090	1239.61	61.5961	0.770933	17.9743	3.49417	0.158899	0.588975	2.05421	7.7335	5.51817	0.110666
DCB-02_tr1 091	1253.61	61.5988	0.815307	18.0989	3.50497	0.218859	0.585571	1.98413	7.62431	5.46896	0.100214
DCB-02_tr1 092	1267.51	61.8715	0.787884	17.8294	3.52978	0.210684	0.619718	1.97548	7.62113	5.47518	0.0792196
DCB-02_tr1 093	1281.41	61.8056	0.763356	18.0136	3.31192	0.208913	0.593217	1.95888	7.65376	5.60401	0.0867359
DCB-02_tr1 094	1295.31	61.8847	0.749957	17.8063	3.50898	0.182286	0.626589	1.92039	7.65139	5.60029	0.0690736
DCB-02_tr1 095	1309.31	62.0959	0.77645	17.9343	3.25072	0.222217	0.577884	1.96251	7.52799	5.56548	0.0865518
DCB-02_tr1 096	1323.21	61.8766	0.794308	17.9561	3.30585	0.190915	0.592842	1.95939	7.68685	5.52649	0.11063
DCB-02_tr1 097	1337.11	61.9718	0.781804	17.9122	3.3264	0.208555	0.605606	1.9152	7.6104	5.56416	0.103925
DCB-02_tr1 098	1351.11	62.0726	0.742624	17.5071	3.50143	0.236472	0.624137	1.96642	7.75531	5.51801	0.0758476
DCB-02_tr1 099	1365.01	61.8093	0.787266	18.001	3.34131	0.235397	0.577355	1.93656	7.59572	5.59896	0.117197
DCB-02_tr1 100	1378.91	61.7676	0.772372	18.0847	3.26893	0.251054	0.578047	1.92112	7.73478	5.55215	0.0692007
DCB-02_tr1 101	1392.81	61.7699	0.780367	18.0254	3.36727	0.215026	0.588623	1.88847	7.71374	5.56549	0.0857305
DCB-02_tr1 102	1406.81	61.8657	0.758264	18.0095	3.28721	0.221085	0.61545	1.85407	7.77706	5.52212	0.0894964
DCB-02_tr1 103	1420.71	61.6913	0.773889	17.966	3.42785	0.236522	0.577997	1.91557	7.77316	5.5753	0.0624071
DCB-02_tr1 104	1434.61	61.6889	0.77841	17.9479	3.43107	0.190013	0.619297	1.90615	7.78511	5.59805	0.0550776
DCB-02_tr1 105	1448.61	61.8408	0.780276	17.9831	3.39075	0.21828	0.617399	1.82657	7.77047	5.50997	0.0623656
DCB-02_tr1 106	1462.51	61.8779	0.757147	17.9425	3.25038	0.238898	0.591206	1.87173	7.78883	5.59508	0.0863413
DCB-02_tr1 107	1476.41	61.8507	0.791124	17.924	3.2516	0.210853	0.60526	1.86666	7.78779	5.6602	0.0517848
DCB-02_tr1 108	1490.31	61.9906	0.792646	17.9311	3.13339	0.191743	0.600701	1.85982	7.80315	5.59967	0.0972361
DCB-02_tr1 109	1504.31	61.6755	0.773724	17.8906	3.506	0.21016	0.595319	1.90326	7.73323	5.62963	0.0825412
DCB-02_tr1 110	1518.21	61.8449	0.776868	18.0408	3.26064	0.2069	0.628102	1.82338	7.71184	5.56668	0.139971
DCB-02_tr1 111	1532.11	62.1093	0.824632	17.8069	3.46215	0.227907	0.597607	1.89647	7.54176	5.46888	0.0643916
DCB-02_tr1 112	1546.11	61.8915	0.727812	18.0323	3.30212	0.263549	0.572644	1.81151	7.73255	5.53804	0.128048
DCB-02_tr1 113	1560.01	61.7883	0.720096	17.9599	3.39375	0.183403	0.571732	1.84204	7.79863	5.65626	0.085895
DCB-02_tr1 114	1573.91	61.603	0.769156	17.8412	3.3043	0.242584	0.573114	1.87378	8.04919	5.69185	0.0518815
DCB-02_tr1 115	1587.81	61.9308	0.75828	17.911	3.37147	0.226671	0.601146	1.84628	7.73633	5.53885	0.0792698
DCB-02_tr1 116	1601.81	61.8976	0.745576	17.9483	3.37532	0.251797	0.561786	1.85292	7.78227	5.50869	0.0757194
DCB-02_tr1 117	1615.71	61.9712	0.714282	17.802	3.30593	0.28391	0.59587	1.87336	7.78397	5.58002	0.0894606
DCB-02_tr1 118	1629.61	61.9596	0.74566	17.827	3.21737	0.239077	0.622732	1.82115	7.75001	5.70627	0.11109
DCB-02_tr1 119	1643.61	61.676	0.765811	17.9082	3.37606	0.171625	0.592573	1.82408	7.90098	5.66371	0.120933
DCB-02_tr1 120	1657.51	61.7219	0.786402	17.9657	3.32325	0.237965	0.594661	1.85297	7.76433	5.6596	0.0932525
DCB-02_tr1 121	1671.41	61.7969	0.80144	18.0254	3.29744	0.189603	0.595953	1.83973	7.81132	5.55941	0.0828382
DCB-02_tr1 122	1685.31	61.5781	0.825541	18.1248	3.27436	0.223059	0.609837	1.78327	7.84838	5.73265	0
DCB-02_tr1 123	1699.31	61.469	0.813347	17.8832	3.36127	0.21657	0.593455	1.83159	8.04088	5.64573	0.145018
DCB-02_tr1 124	1713.22	61.6202	0.804631	18.1714	3.23737	0.198652	0.584029	1.88429	7.92804	5.50252	0.0688567
DCB-02_tr1 125	1727.12	61.8946	0.779573	17.8976	3.26869	0.205145	0.596787	1.77472	7.85088	5.61493	0.117111
DCB-02_tr1 126	1741.12	61.791	0.786878	18.1904	3.21891	0.208377	0.592139	1.79497	7.68126	5.61554	0.120534
DCB-02_tr1 127	1755.02	61.4704	0.773117	18.2175	3.33871	0.24915	0.591744	1.82476	7.84046	5.60462	0.0895336
DCB-02_tr1 128	1768.92	61.4834	0.791508	18.1509	3.3139	0.266119	0.607783	1.78286	7.93724	5.59031	0.0760484
DCB-02_tr1 129	1782.82	61.6336	0.771479	18.1068	3.32882	0.23211	0.579417	1.80563	7.87821	5.60856	0.0553795
DCB-02_tr1 130	1796.82	61.345	0.792394	18.3345	3.2508	0.211052	0.623453	1.79044	8.01196	5.56136	0.0790194
DCB-02_tr1 131	1810.72	61.7912	0.790859	17.907	3.32243	0.216008	0.60948	1.78668	7.98989	5.51062	0.0758839
DCB-02_tr1 132	1824.62	61.6102	0.796502	18.1501	3.33001	0.215001	0.575002	1.84001	7.88002	5.52002	0.0832002
DCB-02_tr1 133	1838.62	61.8389	0.785133	17.7586	3.2626	0.235409	0.593091	1.77686	8.03102	5.63176	0.0866347
DCB-02_tr1 134	1852.52	61.9697	0.774546	17.9378	3.43002	0.247181	0.565754	1.76486	7.72751	5.51395	0.0687001
DCB-02_tr1 135	1866.42	61.8218	0.763557	17.9195	3.27539	0.222667	0.568436	1.81298	7.92304	5.5892	0.10347
DCB-02_tr1 136	1880.32	61.9275	0.746098	17.9757	3.17809	0.20422	0.586392	1.77451	7.87002	5.64436	0.0930367
DCB-02_tr1 137	1894.32	61.7731	0.76836	18.1856	3.33286	0.205977	0.608923	1.73149	7.76667	5.55477	0.0722621
DCB-02_tr1 138	1908.22	61.5633	0.804361	18.1578	3.28311	0.199806	0.611806	1.82283	7.8855	5.61955	0.0519657
Transect 2
DCB-02_tr2 001	0	48.0988	3.37266	15.4794	9.55415	0.259254	5.05386	9.23636	5.94572	2.34753	0.652286
DCB-02_tr2 002	29.3068	48.2739	3.41155	15.5108	9.538	0.269953	5.04049	9.07698	5.82934	2.3051	0.743882
DCB-02_tr2 003	58.6052	48.2811	3.37558	15.5277	9.6153	0.157527	5.002	9.11407	5.83055	2.37314	0.723091
DCB-02_tr2 004	87.8124	48.1849	3.40732	15.4048	9.54461	0.205671	5.01862	9.27777	5.92176	2.36049	0.674075
DCB-02_tr2 005	117.119	48.3566	3.39327	15.5106	9.30842	0.215078	5.08478	9.23666	5.78188	2.40912	0.703565
DCB-02_tr2 006	146.426	48.1284	3.42237	15.3289	9.63182	0.185669	5.08232	9.13998	5.88156	2.40795	0.791039
DCB-02_tr2 007	175.724	47.9916	3.35228	15.5998	9.55757	0.236494	5.16598	9.20094	5.82828	2.35373	0.713251
DCB-02_tr2 008	205.031	48.3285	3.40804	15.5723	9.29	0.226142	5.1018	9.14629	5.85116	2.3302	0.745561
DCB-02_tr2 009	234.238	48.2134	3.41678	15.4471	9.69792	0.236003	5.00241	9.02275	5.8208	2.34264	0.800181
DCB-02_tr2 010	263.545	48.1563	3.41847	15.573	9.51628	0.234776	5.10204	9.11592	5.8617	2.37137	0.650125
DCB-02_tr2 011	292.844	47.9827	3.37386	15.9361	9.4345	0.206431	5.07617	9.04482	5.92733	2.27659	0.741532
DCB-02_tr2 012	322.15	48.3918	3.41468	15.6129	9.47265	0.219177	5.05002	9.08181	5.80084	2.29359	0.662571
DCB-02_tr2 013	351.457	48.1271	3.32756	15.4844	9.59479	0.224763	5.12403	9.15588	5.90998	2.36808	0.683476
DCB-02_tr2 014	380.664	48.0109	3.42351	15.3905	9.82087	0.238113	5.03818	8.98288	6.02946	2.33003	0.735595
DCB-02_tr2 016	439.27	48.3042	3.44375	15.5274	9.40409	0.193278	5.02299	9.08824	5.80751	2.42489	0.783606
DCB-02_tr2 017	468.576	48.2859	3.38777	15.6531	9.41841	0.206736	5.07145	9.04085	5.81635	2.37756	0.74184
DCB-02_tr2 018	497.883	48.1881	3.36694	15.7124	9.50906	0.217219	4.95859	9.03973	5.79522	2.38747	0.825309
DCB-02_tr2 019	527.082	48.2451	3.39567	15.5771	9.4506	0.233094	5.01168	9.11308	5.87083	2.41379	0.689055
DCB-02_tr2 020	556.389	48.0714	3.35167	15.7231	9.34778	0.249787	5.01213	9.18378	5.84236	2.39844	0.81957
DCB-02_tr2 021	585.695	48.4681	3.37864	15.511	9.34757	0.194323	5.01677	9.05066	5.80512	2.41624	0.811488
DCB-02_tr2 022	615.002	48.2183	3.42451	15.7161	9.57029	0.210567	4.98389	8.94857	5.82982	2.35435	0.743608
DCB-02_tr2 023	644.301	48.1564	3.46102	15.5489	9.63334	0.247509	5.0118	9.06848	5.85395	2.38266	0.635924
DCB-02_tr2 024	673.508	48.4531	3.49377	15.8037	9.26564	0.229445	5.02613	8.93874	5.80252	2.34961	0.637358
DCB-02_tr2 025	702.815	48.2226	3.44813	15.5626	9.43375	0.21671	4.99313	8.99378	5.8833	2.45564	0.790307
DCB-02_tr2 026	732.121	48.5008	3.32519	15.5447	9.35336	0.272033	5.03878	8.87397	5.89558	2.36639	0.829155
DCB-02_tr2 027	761.42	47.9842	3.40559	15.6616	9.78853	0.206069	4.97583	9.00341	5.89351	2.35536	0.72588
DCB-02_tr2 028	790.727	48.54	3.34264	15.6468	9.37169	0.236753	5.02421	8.80775	5.83423	2.48134	0.714565
DCB-02_tr2 029	819.934	48.2868	3.43733	15.5962	9.35774	0.208702	5.05852	8.9781	5.88963	2.39074	0.796229
DCB-02_tr2 030	849.241	48.2085	3.46096	15.6611	9.37217	0.221645	4.94132	9.00463	5.9112	2.42982	0.788671
DCB-02_tr2 031	878.539	47.9473	3.55127	15.6462	9.33624	0.228928	5.08501	8.99655	6.01143	2.48074	0.716328
DCB-02_tr2 032	907.846	48.4355	3.33078	15.6433	9.39423	0.29348	4.97038	8.88894	5.86753	2.4027	0.773194
DCB-02_tr2 033	937.153	48.2232	3.39903	15.7834	9.39612	0.230333	5.001	8.85187	6.04843	2.3824	0.684223
DCB-02_tr2 035	995.658	48.3468	3.40616	15.7406	9.52692	0.244521	4.94409	8.88697	5.86272	2.41527	0.62601
DCB-02_tr2 036	1024.96	48.4406	3.39012	15.4874	9.55211	0.210414	4.93577	8.88233	5.92499	2.44213	0.73408
DCB-02_tr2 037	1054.27	48.4337	3.50446	15.6773	9.18375	0.2516	4.9784	8.85392	5.90605	2.46343	0.747378
DCB-02_tr2 038	1083.58	48.3539	3.42957	15.4794	9.44419	0.248309	5.02592	8.96014	5.91163	2.42027	0.726698
DCB-02_tr2 039	1112.78	48.2181	3.36953	15.7825	9.27902	0.235355	4.96725	8.95129	5.99142	2.49899	0.706476
DCB-02_tr2 040	1142.08	47.8553	3.48615	15.4975	9.49712	0.237058	5.11302	8.8844	6.22225	2.472	0.735155
DCB-02_tr2 041	1171.39	48.5375	3.49264	15.6244	9.22468	0.238013	4.86915	8.7727	6.01967	2.46539	0.755849
DCB-02_tr2 042	1200.7	48.5916	3.50968	15.5575	9.33861	0.228026	4.87455	8.71262	5.95208	2.51424	0.721125
DCB-02_tr2 043	1230	48.3911	3.40811	15.7369	9.29019	0.22163	4.8966	8.75639	5.98473	2.47396	0.840428
DCB-02_tr2 044	1259.2	48.4021	3.41938	15.8925	9.44158	0.225679	4.82796	8.63522	5.96095	2.52116	0.673465
DCB-02_tr2 045	1288.51	48.507	3.47427	15.6751	9.34988	0.173305	4.82311	8.74699	6.01867	2.4933	0.738385
DCB-02_tr2 046	1317.82	48.475	3.4354	15.6593	9.52683	0.243965	4.84033	8.46031	6.13245	2.48169	0.744713
DCB-02_tr2 047	1347.12	48.4822	3.34114	15.7657	9.38992	0.239908	4.8329	8.61339	6.02835	2.55439	0.752113
DCB-02_tr2 048	1376.42	48.8269	3.36068	15.9351	9.07077	0.217372	4.72947	8.46809	6.17997	2.57414	0.637507
DCB-02_tr2 049	1405.63	48.8801	3.34614	15.8458	9.15357	0.229246	4.69883	8.37043	6.15323	2.58334	0.739303
DCB-02_tr2 050	1434.94	48.8919	3.35142	15.7762	9.07336	0.271179	4.71038	8.45008	6.14087	2.62596	0.708601
DCB-02_tr2 051	1464.23	49.1263	3.29769	15.7385	8.98902	0.264123	4.66402	8.41372	6.17417	2.62993	0.702582
DCB-02_tr2 055	1581.35	49.8249	3.10829	16.0133	8.5247	0.2144	4.33929	7.99127	6.34993	2.83131	0.802615
DCB-02_tr2 056	1610.66	50.1813	3.13315	15.8082	8.68738	0.241497	4.23179	7.69047	6.31717	2.9297	0.779321
DCB-02_tr2 057	1639.97	50.7537	2.94902	16.0467	8.22675	0.230837	4.1388	7.66746	6.35565	2.94902	0.682038
DCB-02_tr2 058	1669.27	50.8705	2.89408	16.2945	8.15233	0.238659	4.07616	7.35747	6.44034	3.04693	0.629054
DCB-02_tr2 059	1698.47	51.5876	2.71137	16.4012	7.97039	0.216193	3.84707	7.15187	6.47658	3.0797	0.55803
DCB-02_tr2 060	1727.78	52.1182	2.67089	16.1789	7.63405	0.171817	3.87842	7.04052	6.56978	3.14163	0.595783
DCB-02_tr2 061	1757.09	53.369	2.43896	16.198	7.20368	0.21539	3.51951	6.53476	6.64796	3.35486	0.517944
DCB-02_tr2 062	1786.39	53.9287	2.16855	16.4728	6.89253	0.18336	3.319	6.17986	6.76018	3.54298	0.552013
DCB-02_tr2 063	1815.69	54.8376	2.00464	16.841	6.40061	0.153248	3.08328	5.71883	6.91958	3.68366	0.357478
DCB-02_tr2 064	1844.9	56.0088	1.70864	16.8626	6.07177	0.197409	2.73586	5.13609	7.16001	3.91563	0.203206
DCB-02_tr2 065	1874.21	57.8899	1.47091	16.7499	5.35023	0.15919	2.34072	4.61052	7.14377	4.1748	0.110146
DCB-02_tr2 066	1903.51	58.914	1.15083	17.0185	4.91034	0.142532	2.1146	4.0157	7.2791	4.38169	0.072791
DCB-02_tr2 067	1932.81	59.8095	0.996349	17.1131	4.347	0.147004	1.8121	3.63438	7.3502	4.69313	0.0972222
DCB-02_tr2 068	1962.12	60.9402	0.821561	17.2051	4.05123	0.11396	1.4154	3.12177	7.44578	4.80894	0.0760742
DCB-02_tr2 069	1991.32	61.3046	0.768082	17.5011	3.82266	0.110016	1.23775	2.79856	7.3817	4.98873	0.0867958
DCB-02_tr2 070	2020.63	61.5382	0.79602	17.6299	3.53204	0.112823	1.08363	2.64398	7.46773	5.1265	0.0692279
DCB-02_tr2 071	2049.93	61.908	0.697381	17.582	3.54893	0.137483	0.894657	2.53205	7.4131	5.21663	0.0697584
DCB-02_tr2 072	2079.24	62.2695	0.760169	17.3668	3.41372	0.111666	0.790193	2.39577	7.45465	5.37763	0.0599457
DCB-02_tr2 073	2108.44	61.9828	0.773896	17.6107	3.52417	0.177224	0.702499	2.21403	7.55615	5.41321	0.0452963
DCB-02_tr2 074	2137.75	62.0184	0.760041	17.6433	3.50648	0.17482	0.678223	2.17644	7.62761	5.27988	0.134818
DCB-02_tr2 075	2167.05	61.9298	0.768595	17.8203	3.43829	0.181347	0.602462	2.14006	7.63727	5.42621	0.0556821
DCB-02_tr2 076	2196.36	62.1536	0.767864	17.7349	3.28574	0.166022	0.618577	2.01022	7.77558	5.44903	0.0384697
DCB-02_tr2 078	2254.87	61.7975	0.741245	17.9736	3.44671	0.192002	0.611284	1.94638	7.68414	5.56542	0.041766
DCB-02_tr2 079	2284.17	62.1866	0.742725	17.8311	3.28148	0.238589	0.584911	1.94869	7.59284	5.49269	0.100464
DCB-02_tr2 080	2313.48	62.2622	0.756683	17.922	3.29344	0.173158	0.58403	1.9498	7.55673	5.40488	0.0970858
DCB-02_tr2 081	2342.78	62.1681	0.738134	17.8902	3.35881	0.226971	0.594932	1.9107	7.58246	5.46058	0.0690869
DCB-02_tr2 082	2372.09	62.1357	0.810938	17.782	3.26443	0.222123	0.585874	1.93636	7.73528	5.45424	0.0729935
DCB-02_tr2 083	2401.29	62.1365	0.748964	17.7994	3.33612	0.215487	0.612597	1.8646	7.80108	5.4023	0.0829495
DCB-02_tr2 084	2430.59	62.0057	0.760207	17.7958	3.32337	0.201028	0.578896	1.89036	7.86632	5.49829	0.080086
DCB-02_tr2 085	2459.9	62.3355	0.793644	17.6936	3.26279	0.227288	0.603113	1.84287	7.71389	5.45813	0.0691833
DCB-02_tr2 086	2489.21	62.1115	0.745257	17.6535	3.29356	0.285577	0.579869	1.89506	7.90455	5.48251	0.0486434
DCB-02_tr2 087	2518.51	62.0545	0.753562	17.8669	3.2926	0.198667	0.591457	1.8988	7.76691	5.52471	0.0519141
DCB-02_tr2 088	2547.71	62.0263	0.83121	17.7682	3.19462	0.201717	0.625537	1.85592	7.92063	5.5272	0.0486799
DCB-02_tr2 089	2577.02	62.0151	0.766457	17.8085	3.34037	0.228851	0.589793	1.77679	7.8585	5.5842	0.0313731
DCB-02_tr2 090	2606.33	62.1546	0.748097	17.7293	3.20962	0.250351	0.601982	1.83407	7.8865	5.52259	0.0628678
DCB-02_tr2 091	2635.63	62.2224	0.742736	17.6258	3.2738	0.217915	0.601852	1.78386	7.87536	5.63539	0.0208793
DCB-02_tr2 092	2664.93	62.0142	0.749923	17.6405	3.35048	0.223433	0.607225	1.78625	7.95235	5.65142	0.0242204
DCB-02_tr2 093	2694.14	61.8921	0.756179	17.8244	3.29299	0.189724	0.579747	1.81265	7.94547	5.57895	0.127792
DCB-02_tr2 094	2723.45	62.1454	0.778844	17.9078	3.2228	0.222252	0.592975	1.79382	7.78337	5.47268	0.0800633
DCB-02_tr2 095	2752.74	61.9982	0.804222	17.9877	3.0639	0.185863	0.597561	1.81602	7.94381	5.51907	0.0835977
DCB-02_tr2 096	2782.05	61.9452	0.771129	17.6654	3.34702	0.252897	0.620058	1.79991	8.01869	5.53118	0.0485369
DCB-02_tr2 097	2811.36	61.82	0.748585	17.9066	3.36251	0.222227	0.589794	1.79668	7.93954	5.50046	0.113623
DCB-02_tr2 098	2840.57	61.5979	0.775839	17.8141	3.37189	0.242939	0.62187	1.74688	8.14535	5.59612	0.0870395
DCB-02_tr2 099	2869.86	62.6753	0.747502	18.3274	3.49141	0.254203	0.549722	1.57063	7.40299	4.91198	0.0688278
DCB-02_tr2 101	2928.48	61.9935	0.757934	17.795	3.24467	0.160814	0.58404	1.78457	7.97986	5.65789	0.0417751
DCB-02_tr2 102	2957.78	61.9918	0.74864	17.7933	3.22313	0.222975	0.598159	1.7895	8.02223	5.57184	0.0384335
DCB-02_tr2 103	2986.98	62.2612	0.759609	17.6385	3.26038	0.216684	0.593045	1.77195	7.86745	5.5791	0.0521459
DCB-02_tr2 104	3016.29	61.8676	0.797378	17.9005	3.25832	0.244779	0.569498	1.79106	8.06485	5.46427	0.0416903
DCB-02_tr2 105	3045.6	61.7287	0.769569	18.0281	3.32362	0.196194	0.579619	1.79274	7.99683	5.5293	0.055293
DCB-02_tr2 106	3074.9	61.7295	0.780997	17.7757	3.31651	0.213955	0.602735	1.79981	8.08904	5.60166	0.0900917
DCB-02_tr2 107	3104.2	61.8066	0.801793	17.7546	3.33405	0.227303	0.557871	1.7633	8.08684	5.56351	0.104176
DCB-02_tr2 108	3133.41	61.929	0.771024	17.7258	3.29194	0.223143	0.589815	1.76246	8.23492	5.39879	0.0730305
DCB-02_tr2 109	3162.72	62.0335	0.80255	17.8782	3.29096	0.219263	0.564006	1.78681	7.83369	5.53204	0.0589546
DCB-02_tr2 110	3192.02	61.9218	0.790904	17.754	3.28029	0.244659	0.559366	1.76631	8.04429	5.53108	0.107291
DCB-02_tr2 111	3221.32	61.9795	0.822739	17.7563	3.22842	0.174923	0.580607	1.75634	8.09135	5.52283	0.0870048
DCB-02_tr2 112	3250.63	61.9947	0.756075	17.6522	3.25172	0.208332	0.576119	1.79753	8.12929	5.54408	0.0899776
DCB-02_tr2 113	3279.83	62.006	0.815788	17.7566	3.22662	0.24707	0.577241	1.81624	7.97524	5.50961	0.0696058
DCB-02_tr2 114	3309.14	61.8237	0.703985	17.9485	3.27623	0.250571	0.577891	1.79991	8.02879	5.52106	0.0693671
DCB-02_tr2 115	3338.44	61.823	0.748415	17.8063	3.26992	0.258844	0.569945	1.82342	8.03729	5.57211	0.0907633
DCB-02_tr2 116	3367.75	61.9599	0.700256	17.8284	3.28149	0.22398	0.575437	1.74809	8.04528	5.60205	0.0350639
DCB-02_tr2 117	3397.05	61.9889	0.767723	17.5572	3.36311	0.204225	0.581787	1.73744	8.10803	5.62889	0.0626899
DCB-02_tr2 118	3426.26	61.8393	0.743699	17.7483	3.28521	0.236881	0.58249	1.75957	8.09607	5.61436	0.0940812
DCB-02_tr2 119	3455.56	61.8313	0.757001	17.8833	3.26442	0.199413	0.592259	1.77414	8.01912	5.61642	0.0625511
DCB-02_tr2 120	3484.87	61.9838	0.78044	17.5983	3.22822	0.232452	0.600307	1.79121	8.09585	5.61649	0.0728626
DCB-02_tr2 121	3514.17	61.7545	0.783125	17.8084	3.26722	0.246655	0.609276	1.83529	8.12772	5.51596	0.0518319
DCB-02_tr2 122	3543.48	62.1192	0.792859	17.6921	3.17265	0.219458	0.576128	1.80861	8.00234	5.53698	0.0797203
DCB-02_tr2 123	3572.68	61.7538	0.765669	17.7329	3.42421	0.303563	0.532952	1.78187	8.12578	5.53884	0.0404679
DCB-02_tr2 124	3601.99	61.889	0.784219	17.7406	3.13606	0.236372	0.594938	1.83698	8.1497	5.53124	0.100882
DCB-02_tr2 125	3631.29	62.0348	0.783864	17.8243	3.3008	0.196525	0.56916	1.75704	7.94224	5.52504	0.0662192
DCB-02_tr2 126	3660.6	61.9844	0.754443	17.6388	3.34722	0.197385	0.55006	1.74461	8.08404	5.62941	0.0695816
DCB-02_tr2 127	3689.9	61.6804	0.788928	17.9029	3.17846	0.196597	0.607664	1.7974	8.16448	5.56484	0.118304
DCB-02_tr2 128	3719.1	61.7498	0.764053	17.8546	3.26015	0.181492	0.624709	1.79765	8.11482	5.56561	0.0870388
DCB-02_tr2 129	3748.41	61.8268	0.835003	17.9205	3.16304	0.204428	0.602809	1.76968	8.09577	5.52261	0.0592944
DCB-02_tr2 130	3777.72	61.9445	0.721855	17.8887	3.11197	0.217634	0.589037	1.76955	8.13587	5.49171	0.129157
DCB-02_tr2 131	3807.02	61.8071	0.743813	17.9241	3.15115	0.255334	0.586965	1.76302	8.10585	5.5829	0.0798426
DCB-02_tr2 132	3836.32	61.7987	0.773828	17.622	3.34595	0.22641	0.636542	1.77437	8.22293	5.51575	0.083446
DCB-02_tr2 133	3865.53	61.7621	0.734539	17.8113	3.21171	0.210332	0.557034	1.88447	8.24711	5.50145	0.0799382
DCB-02_tr2 134	3894.84	62.3048	0.742004	17.5394	3.07015	0.220078	0.595589	1.80359	8.13641	5.53235	0.0556275
DCB-02_tr2 135	3924.14	61.7229	0.775339	17.7887	3.41778	0.22961	0.589947	1.77481	8.10328	5.49685	0.100809
DCB-02_tr2 136	3953.44	61.6949	0.788867	17.9765	3.13875	0.226541	0.597994	1.79357	8.18318	5.54377	0.0559473
DCB-02_tr2 137	3982.75	61.7677	0.781712	17.7366	3.35804	0.178689	0.586945	1.7706	8.273	5.51533	0.0314435
DCB-02_tr2 138	4011.96	61.9432	0.744828	17.7432	3.16297	0.217225	0.590557	1.78555	8.1523	5.63212	0.0280586
DCB-02_tr2 139	4041.25	61.8574	0.743975	17.7229	3.14012	0.270416	0.589205	1.76822	8.17042	5.65019	0.0871918
DCB-02_tr2 140	4070.56	61.6338	0.751009	17.9393	3.31343	0.180612	0.577715	1.79901	8.14127	5.56981	0.0941176

## Sheet: DCB-07
Experiment	DCB-07
Label	Distance (µm)	SiO2	TiO2	Al2O3	FeO	MnO	MgO	CaO	Na2O	K2O	P2O5
Transect 1
DCB-09_tr1 001	0	46.834	3.34381	16.6776	10.7768	0.209842	5.05195	8.37505	5.82837	2.2154	0.687086
DCB-09_tr1 002	44.1906	47.0157	3.179	16.9407	10.4991	0.239889	5.12404	8.28213	5.80376	2.23785	0.677838
DCB-09_tr1 003	88.3906	47.0473	3.21744	16.8345	10.5968	0.246705	5.11677	8.25118	5.83291	2.18993	0.666529
DCB-09_tr1 004	132.482	46.9296	3.32466	16.5506	10.7844	0.223272	5.08049	8.31165	5.93244	2.1922	0.67075
DCB-09_tr1 005	176.672	46.7137	3.16404	16.8783	10.9756	0.225217	4.94835	8.21613	5.89237	2.19927	0.787067
DCB-09_tr1 006	220.863	47.0947	3.22211	16.7342	10.7889	0.211724	5.03065	8.26315	5.85176	2.13075	0.672069
DCB-09_tr1 007	265.063	46.9038	3.29313	16.7046	10.8767	0.212547	5.05917	8.14453	5.80713	2.18157	0.816843
DCB-09_tr1 008	309.253	46.6069	3.22216	16.7032	11.132	0.232619	5.10348	8.27366	5.88303	2.17236	0.67052
DCB-09_tr1 009	353.444	46.7627	3.2451	16.8808	10.8274	0.235374	5.10687	8.24796	5.82454	2.205	0.664309
DCB-09_tr1 010	397.544	46.9942	3.24883	16.7925	10.7915	0.284841	4.9974	8.1738	5.80443	2.14174	0.77082
DCB-09_tr1 011	441.735	46.7931	3.29062	16.7015	10.8342	0.191746	5.07046	8.2576	5.8569	2.2041	0.799787
DCB-09_tr1 012	485.926	47.0716	3.31902	16.5847	10.7294	0.274393	5.05159	8.17231	5.90744	2.23355	0.655976
DCB-09_tr1 013	530.116	46.9106	3.23414	16.7842	10.6799	0.242716	5.002	8.36093	5.80273	2.23582	0.746868
DCB-09_tr1 014	574.316	46.6219	3.26935	17.0836	10.8356	0.226779	5.05452	8.13704	5.92634	2.12767	0.717181
DCB-09_tr1 015	618.407	46.9792	3.18732	16.7983	10.7663	0.213768	5.00419	8.26419	5.74133	2.23216	0.813233
DCB-09_tr1 016	662.598	46.9297	3.17921	16.7584	10.8259	0.265973	5.03894	8.17659	5.85972	2.22337	0.742231
DCB-09_tr1 017	706.798	46.578	3.32774	16.7113	10.9162	0.205055	5.13157	8.18977	5.99201	2.21849	0.729823
DCB-09_tr1 018	750.988	47.2208	3.25551	16.5745	10.7527	0.248564	5.00522	8.1971	5.72631	2.16327	0.855977
DCB-09_tr1 019	795.179	46.8909	3.35529	16.8803	10.6372	0.254192	4.99657	8.08177	5.91071	2.24378	0.749278
DCB-09_tr1 020	839.369	47.0324	3.26729	16.9504	10.6551	0.222259	5.00499	8.1058	5.83743	2.19554	0.728794
DCB-09_tr1 021	883.47	47.0042	3.25782	16.6222	10.5645	0.194012	5.13132	8.27465	5.95358	2.28984	0.707977
DCB-09_tr1 022	927.66	47.0503	3.23845	16.4604	11.0767	0.201423	5.02269	8.18894	5.77558	2.21741	0.768049
DCB-09_tr1 023	971.851	46.7777	3.24386	16.7255	11.0229	0.243083	5.09307	8.15098	5.81622	2.23145	0.695158
DCB-09_tr1 024	1016.05	46.8551	3.29191	16.7295	10.9557	0.205303	4.94305	8.19342	5.88805	2.25345	0.684446
DCB-09_tr1 025	1060.24	46.6019	3.27669	16.9972	10.8807	0.278259	5.01386	8.16573	5.86684	2.23647	0.682384
DCB-09_tr1 026	1104.33	46.9814	3.30403	16.748	10.8235	0.233146	5.00265	8.12025	5.85196	2.2165	0.718497
DCB-09_tr1 027	1148.53	46.856	3.22608	16.9292	10.6741	0.26317	5.0414	8.14301	5.85052	2.26137	0.755173
DCB-09_tr1 028	1192.72	46.798	3.22781	16.741	10.9808	0.231447	4.97145	8.14736	5.89516	2.29372	0.713232
DCB-09_tr1 029	1236.91	46.9877	3.31972	16.7343	10.7317	0.210249	4.96915	8.1636	5.95045	2.25491	0.678247
DCB-09_tr1 030	1281.1	46.8885	3.12452	16.7157	10.9616	0.27337	5.02192	8.03301	6.04281	2.25832	0.68028
DCB-09_tr1 031	1325.3	46.935	3.28173	16.5738	10.805	0.274923	5.0774	8.19401	5.90299	2.24974	0.70547
DCB-09_tr1 032	1369.4	47.0035	3.31814	16.4559	10.9395	0.261822	4.98758	8.16055	5.84822	2.29159	0.733205
DCB-09_tr1 033	1413.59	46.7694	3.15729	16.832	10.8694	0.249685	5.02062	8.19861	5.90052	2.28774	0.714791
DCB-09_tr1 034	1457.79	46.9727	3.14739	16.9069	10.7881	0.312979	4.96956	8.11695	5.82888	2.22595	0.730629
DCB-09_tr1 035	1501.98	47.3466	3.26991	16.8034	10.7381	0.226624	5.01317	7.91174	5.74555	2.23839	0.706486
DCB-09_tr1 036	1546.17	47.3434	3.23387	16.6269	10.5855	0.239161	5.02238	8.12107	5.81265	2.23563	0.779456
DCB-09_tr1 037	1590.26	46.9806	3.15836	16.758	10.7218	0.260149	4.98688	8.07252	6.05699	2.2441	0.760604
DCB-09_tr1 038	1634.46	46.8812	3.28936	16.9345	10.8435	0.284629	4.95999	8.08333	5.75898	2.25171	0.712765
DCB-09_tr1 039	1678.65	47.3047	3.27311	16.6763	10.7722	0.264334	4.94073	7.96525	5.87295	2.29946	0.631005
DCB-09_tr1 040	1722.84	47.0892	3.29157	17.0393	10.6327	0.266129	4.86987	7.97454	5.84592	2.31552	0.675136
DCB-09_tr1 041	1767.04	47.1658	3.28461	16.6821	10.8071	0.218111	4.91138	7.9784	5.85428	2.30027	0.797943
DCB-09_tr1 042	1811.23	47.1486	3.31668	16.5938	10.7585	0.247922	4.91283	8.04294	5.90783	2.30094	0.769987
DCB-09_tr1 043	1855.32	47.3199	3.21693	16.8214	10.5951	0.271986	4.85652	7.93854	5.9565	2.366	0.657083
DCB-09_tr1 044	1899.51	46.8324	3.34666	16.7956	10.7675	0.291845	5.00959	8.02366	5.83067	2.41126	0.690742
DCB-09_tr1 045	1943.71	47.0886	3.17871	16.8596	10.8346	0.225626	4.92389	8.00911	5.93152	2.3269	0.621407
DCB-09_tr1 046	1987.9	47.174	3.30828	16.8102	10.7105	0.27469	4.9314	7.93986	5.87219	2.28478	0.694118
DCB-09_tr1 047	2032.09	47.2846	3.14543	16.7894	10.7873	0.315987	4.82643	7.90998	5.78553	2.37196	0.78347
DCB-09_tr1 048	2076.19	47.2242	3.1393	16.9294	10.5887	0.308128	4.86954	7.90524	5.87453	2.34152	0.81943
DCB-09_tr1 049	2120.38	47.5845	3.30563	16.7147	10.5283	0.31305	4.65275	7.8962	6.01023	2.33156	0.663198
DCB-09_tr1 050	2164.57	47.4749	3.29239	16.8255	10.5627	0.299535	4.72568	7.87267	5.95124	2.30571	0.689741
DCB-09_tr1 051	2208.76	47.288	3.24384	16.9607	10.6686	0.272277	4.72674	7.70284	6.05517	2.34792	0.733932
DCB-09_tr1 052	2252.96	47.3496	3.25905	16.918	10.6801	0.337218	4.75364	7.72207	5.86421	2.37682	0.739305
DCB-09_tr1 053	2297.16	47.4816	3.2609	16.8166	10.5143	0.222096	4.74502	7.84915	5.99921	2.40387	0.707259
DCB-09_tr1 054	2341.25	47.6412	3.23705	16.843	10.4922	0.250332	4.61409	7.68672	6.06305	2.38412	0.7883
DCB-09_tr1 055	2385.45	47.6243	3.23933	16.6016	10.6628	0.270567	4.65134	7.66225	6.0945	2.4295	0.763837
DCB-09_tr1 056	2429.64	48.2281	3.11717	16.8804	10.2421	0.285516	4.57737	7.57027	5.9858	2.48545	0.627784
DCB-09_tr1 057	2473.83	47.8916	3.11363	17.1302	10.1011	0.253881	4.65482	7.54977	6.08147	2.50965	0.713948
DCB-09_tr1 058	2518.02	48.2101	3.08867	17.0135	10.33	0.254118	4.48322	7.32396	6.08437	2.48953	0.722583
DCB-09_tr1 059	2562.12	48.2827	3.21885	17.1535	9.97534	0.242493	4.42206	7.34267	6.03662	2.57096	0.754835
DCB-09_tr1 060	2606.31	48.5912	3.0441	16.7789	10.0258	0.275008	4.4155	7.36609	6.16092	2.61813	0.724349
DCB-09_tr1 061	2650.5	48.5015	3.02489	17.2925	9.9522	0.267801	4.35667	7.17508	6.20464	2.56032	0.664444
DCB-09_tr1 062	2694.7	48.8964	2.92243	17.1008	9.87223	0.253518	4.21325	7.18731	6.26825	2.66426	0.621455
DCB-09_tr1 063	2738.89	48.9643	2.88512	17.29	9.77218	0.255111	4.19842	6.98013	6.33899	2.66796	0.647756
DCB-09_tr1 064	2783.08	49.6906	2.77319	17.1855	9.31957	0.204433	4.10308	6.83504	6.34019	2.83505	0.713297
DCB-09_tr1 065	2827.17	49.9625	2.68152	17.1781	9.30825	0.284385	3.98632	6.59591	6.50345	2.81508	0.684454
DCB-09_tr1 066	2871.37	50.2647	2.58807	17.337	8.94912	0.217128	3.87691	6.73522	6.6001	2.84792	0.583823
DCB-09_tr1 067	2915.56	50.6854	2.51563	17.6198	8.73743	0.213777	3.80969	6.44955	6.4392	2.92973	0.599818
DCB-09_tr1 068	2959.75	51.4269	2.45433	17.5013	8.51247	0.196242	3.6556	6.13064	6.607	2.98247	0.533013
DCB-09_tr1 069	3003.95	51.5688	2.32844	17.6504	8.29508	0.276918	3.54464	6.06019	6.68388	3.12885	0.462778
DCB-09_tr1 070	3048.04	51.9131	2.18341	17.8416	8.17219	0.205448	3.49345	5.88481	6.72698	3.20233	0.37669
DCB-09_tr1 071	3092.23	52.6966	2.16888	17.8699	7.63779	0.16469	3.35191	5.63494	6.72457	3.34153	0.409182
DCB-09_tr1 072	3136.43	53.2963	2.01118	17.9364	7.4701	0.192499	3.10912	5.44866	6.79286	3.35539	0.38746
DCB-09_tr1 073	3180.63	53.7747	1.7918	17.846	7.53794	0.219033	2.96575	5.27244	6.84799	3.38795	0.356404
DCB-09_tr1 074	3224.82	54.2005	1.7909	18.0943	7.0298	0.182384	2.91279	5.00217	6.92688	3.56122	0.299101
DCB-09_tr1 075	3269.01	55.2059	1.54472	18.0028	6.72419	0.209709	2.65079	4.78984	6.92889	3.61285	0.330274
DCB-09_tr1 076	3313.11	55.4884	1.43754	18.3241	6.55537	0.152167	2.61183	4.60425	6.95799	3.65449	0.213901
DCB-09_tr1 077	3357.3	56.1641	1.40431	18.1532	6.25301	0.153707	2.46424	4.35349	7.05389	3.81957	0.180403
DCB-09_tr1 078	3401.49	56.7737	1.24679	18.3016	5.99499	0.183628	2.29791	4.16688	7.00607	3.94219	0.0862993
DCB-09_tr1 079	3445.69	57.5801	1.15088	18.1934	5.5901	0.186541	2.09885	3.92126	7.09512	4.0646	0.119174
DCB-09_tr1 080	3489.88	57.982	1.03679	18.1656	5.47951	0.148245	2.0047	3.71126	7.23747	4.13276	0.101571
DCB-09_tr1 081	3534.07	58.494	0.997687	18.3398	5.16063	0.141146	1.87098	3.44384	7.25777	4.22513	0.0690825
DCB-09_tr1 082	3578.16	58.9044	0.876027	18.3302	4.8846	0.162235	1.74524	3.32525	7.3837	4.33728	0.0511179
DCB-09_tr1 083	3622.36	59.2067	0.811544	18.7319	4.80331	0.184554	1.56379	3.07248	7.30226	4.24002	0.083469
DCB-09_tr1 084	3666.55	59.6218	0.734264	18.6997	4.46498	0.137226	1.47447	2.94934	7.37336	4.46498	0.0798781
DCB-09_tr1 085	3710.74	60.0275	0.710496	18.756	4.24085	0.131425	1.31046	2.7965	7.36515	4.53792	0.12364
DCB-09_tr1 086	3754.94	60.3254	0.640716	18.7007	4.23354	0.168935	1.21899	2.71068	7.34016	4.58887	0.0720818
DCB-09_tr1 087	3799.03	60.4817	0.635642	18.8941	3.90172	0.188225	1.14717	2.68307	7.42453	4.56737	0.0763958
DCB-09_tr1 088	3843.22	60.3441	0.678041	19.1609	3.9446	0.173726	1.0491	2.53435	7.37823	4.64972	0.0871694
DCB-09_tr1 089	3887.41	60.5457	0.728658	19.0485	3.95308	0.188335	0.964409	2.32474	7.44531	4.72117	0.0800858
DCB-09_tr1 090	3931.61	60.5281	0.689571	18.9498	4.00841	0.176205	0.941822	2.35971	7.54282	4.71942	0.084187
DCB-09_tr1 091	3975.8	60.6758	0.689794	19.127	3.85599	0.154546	0.86158	2.27483	7.60998	4.69248	0.0580439
DCB-09_tr1 092	4019.99	60.8888	0.697749	18.8803	3.99153	0.157917	0.809594	2.13429	7.59315	4.79189	0.0547938
DCB-09_tr1 093	4064.09	60.7041	0.691253	19.2003	3.82782	0.184756	0.751988	2.08233	7.56377	4.90982	0.0838037
DCB-09_tr1 094	4108.29	60.9556	0.695886	19.1263	3.66905	0.219424	0.761148	2.08632	7.49226	4.90234	0.0916749
DCB-09_tr1 095	4152.48	61.0476	0.730583	18.9896	3.75078	0.159255	0.726074	2.00862	7.65529	4.88832	0.0438616
DCB-09_tr1 096	4196.67	60.8922	0.719152	19.0601	3.71182	0.222811	0.656982	1.92237	7.70995	5.02067	0.0838483
DCB-09_tr1 097	4240.87	61.1195	0.71398	19.0871	3.69493	0.204548	0.704385	1.8985	7.66546	4.82791	0.0836974
DCB-09_tr1 098	4284.96	60.4728	0.78392	18.8052	4.03385	0.202392	0.650196	1.99361	7.89283	5.09478	0.0704175
DCB-09_tr1 099	4329.15	61.1345	0.700535	19.0246	3.7231	0.25223	0.601014	1.90246	7.52802	5.04254	0.0910317
DCB-09_tr1 100	4373.35	61.133	0.675407	19.1314	3.63681	0.199362	0.613673	1.88462	7.73204	4.9102	0.0834327
DCB-09_tr1 101	4417.54	61.1454	0.710429	19.1809	3.68469	0.211972	0.627217	1.75023	7.62527	4.94363	0.120264
DCB-09_tr1 102	4461.73	61.1714	0.721721	19.2078	3.58872	0.261712	0.606005	1.75358	7.61584	4.97528	0.0978743
DCB-09_tr1 103	4505.92	61.0578	0.742565	19.0249	3.6862	0.23305	0.628088	1.80214	7.72054	5.01733	0.0873425
DCB-09_tr1 104	4550.02	61.0184	0.716788	19.3065	3.65676	0.206597	0.636422	1.78706	7.56144	5.05129	0.0587768
DCB-09_tr1 105	4594.21	60.971	0.696752	19.3119	3.6525	0.205877	0.588309	1.77995	7.70625	5.01061	0.0768568
DCB-09_tr1 106	4638.4	61.1827	0.709923	19.1215	3.5948	0.273672	0.593955	1.73647	7.73797	5.01648	0.0324954
DCB-09_tr1 107	4682.6	60.8753	0.717726	19.2491	3.81301	0.261493	0.563161	1.72761	7.76914	4.95794	0.0655266
DCB-09_tr1 108	4726.79	61.1169	0.760743	19.32	3.50436	0.205869	0.587364	1.71642	7.74433	4.9858	0.0582358
DCB-09_tr1 109	4770.88	61.4003	0.763352	18.9736	3.4544	0.305156	0.584379	1.69133	7.7186	5.04323	0.0657054
DCB-09_tr1 110	4815.07	61.0426	0.721748	19.2917	3.56723	0.241198	0.627955	1.71186	7.71874	5.03307	0.0438728
DCB-09_tr1 111	4859.27	61.3155	0.737151	19.0936	3.56604	0.283245	0.611627	1.60981	7.72302	4.96189	0.098117
DCB-09_tr1 112	4903.46	61.0829	0.766914	19.334	3.43898	0.240729	0.584525	1.64785	7.79912	5.03565	0.0692914
DCB-09_tr1 113	4947.65	60.9674	0.67462	19.3087	3.56691	0.284116	0.600086	1.67006	7.81422	5.05141	0.0624725
DCB-09_tr1 114	4991.85	60.948	0.748536	19.425	3.61158	0.270563	0.598359	1.61195	7.69246	4.99908	0.0944724
DCB-09_tr1 115	5035.95	61.4005	0.738506	19.0334	3.42991	0.285758	0.587897	1.61769	7.80177	5.06808	0.0364492
DCB-09_tr1 116	5080.14	61.3056	0.704182	19.1037	3.63686	0.225976	0.627359	1.65498	7.6415	5.01601	0.0837704
DCB-09_tr1 117	5124.33	61.043	0.685048	19.1143	3.66953	0.292132	0.590396	1.65589	7.83992	5.01878	0.0909717
DCB-09_tr1 118	5168.53	61.2719	0.739122	19.0218	3.52255	0.248008	0.592707	1.64386	7.85171	5.00304	0.10537
DCB-09_tr1 119	5212.72	61.065	0.722367	19.0636	3.61798	0.233375	0.589639	1.57838	7.98416	5.08362	0.0619054
DCB-09_tr1 120	5256.81	61.085	0.686618	19.2335	3.55835	0.203685	0.622915	1.60535	7.85291	5.02054	0.131189
DCB-09_tr1 121	5301.01	61.0082	0.725489	19.2208	3.58266	0.244095	0.614921	1.61632	7.87568	5.02396	0.0879193
DCB-09_tr1 122	5345.2	61.0056	0.734052	19.1621	3.6012	0.214231	0.578034	1.61645	7.84694	5.13581	0.105581
DCB-09_tr1 123	5389.39	61.1085	0.705435	19.1659	3.57002	0.259999	0.610167	1.60141	7.77243	5.08982	0.116382
DCB-09_tr1 124	5433.58	61.0714	0.669464	19.1657	3.43051	0.271257	0.639062	1.55092	7.9703	5.12523	0.106202
DCB-09_tr1 125	5477.78	61.0685	0.754665	19.2347	3.43587	0.247465	0.611299	1.56455	7.83297	5.13335	0.116574
DCB-09_tr1 126	5521.87	61.1663	0.740931	19.2466	3.51896	0.269616	0.579654	1.57994	7.79712	5.01683	0.0840242
DCB-09_tr1 127	5566.06	60.7619	0.651246	19.3003	3.54538	0.251753	0.596686	1.59389	8.08183	5.11883	0.0981876
DCB-09_tr1 128	5610.26	60.959	0.769298	19.0791	3.65018	0.289867	0.597219	1.53369	8.03653	5.0305	0.0545993
DCB-09_tr1 129	5654.45	61.1975	0.706496	19.0986	3.60467	0.25499	0.591801	1.57704	7.90571	4.99739	0.0657443
DCB-09_tr1 130	5698.64	60.9471	0.737618	19.3661	3.49679	0.244056	0.582319	1.56327	7.96035	5.02921	0.073227
DCB-09_tr1 131	5742.74	60.8715	0.689836	19.279	3.6576	0.222521	0.586443	1.63468	7.87713	5.10838	0.0728456
DCB-09_tr1 132	5786.93	61.0213	0.743876	19.0028	3.54324	0.2661	0.605108	1.59293	8.01568	5.13616	0.0728049
DCB-09_tr1 133	5831.12	60.7669	0.730735	19.3024	3.73793	0.2638	0.609916	1.54215	7.85374	5.12689	0.0654649
DCB-09_tr1 134	5875.32	60.9382	0.735511	19.4123	3.54352	0.191247	0.562752	1.5612	7.91899	5.12526	0.01099
DCB-09_tr1 135	5919.52	60.8906	0.718543	19.1071	3.5999	0.2563	0.606239	1.57944	8.01003	5.15883	0.0730235
DCB-09_tr1 136	5963.71	60.9205	0.737697	19.4687	3.56122	0.256367	0.588577	1.49838	7.8819	5.03908	0.0475172
DCB-09_tr1 137	6007.8	60.9975	0.724262	19.178	3.56633	0.248512	0.571846	1.54164	8.01653	5.05658	0.0987677
DCB-09_tr1 138	6052	60.8668	0.733788	19.2865	3.57195	0.24203	0.629607	1.50884	7.97529	5.10131	0.0839612
DCB-09_tr1 139	6096.19	61.1056	0.711253	19.2575	3.53878	0.241645	0.591202	1.51221	7.98282	4.98927	0.069644
DCB-09_tr1 140	6140.38	61.0442	0.729578	19.1519	3.62943	0.255188	0.57548	1.52764	7.9663	5.05455	0.0657194
DCB-09_tr1 141	6184.57	60.6606	0.755261	19.2708	3.66771	0.205207	0.609679	1.56748	8.02183	5.14298	0.0984543
DCB-09_tr1 142	6228.67	60.969	0.677902	19.2805	3.65238	0.209575	0.612262	1.54326	8.01466	5.00016	0.0403305
DCB-09_tr1 143	6272.86	61.1611	0.691052	19.1828	3.45885	0.31725	0.556803	1.53955	7.99539	5.04972	0.0475207
DCB-09_tr1 144	6317.05	61.0417	0.695634	19.0462	3.66822	0.236442	0.599586	1.53268	7.98018	5.17026	0.029121
DCB-09_tr1 145	6361.25	60.8462	0.71261	19.2385	3.5956	0.27308	0.616624	1.5085	8.10043	5.0421	0.0663326
DCB-09_tr1 146	6405.44	61.1714	0.736447	19.2609	3.54318	0.237208	0.585243	1.53469	7.88977	5.02638	0.0147289
DCB-09_tr1 147	6449.63	60.8849	0.723144	19.5433	3.39794	0.269261	0.590727	1.47244	8.00061	5.06602	0.0515869
DCB-09_tr1 148	6493.72	60.8434	0.72002	19.1853	3.55706	0.247024	0.567782	1.56594	8.0682	5.17485	0.0704153
DCB-09_tr1 149	6537.92	60.9354	0.71509	19.1588	3.65571	0.247822	0.60138	1.51199	8.05706	5.05378	0.0629652
DCB-09_tr1 150	6582.11	61.0629	0.766004	19.1373	3.63055	0.260907	0.583451	1.45632	7.94823	5.11763	0.0367157

[truncated: 4 more sheets: DCB-09, DCB-10, DCB-11, DCB-12]
