# Supplementary material for: Chemical interdiffusion between Na-series tephritic and phonolitic melts with different H2O content, temperature, and oxygen fugacity values
Source: Copernicus journal article supplement (doi:10.5194/ejm-36-623-2024), 2024-08-23
Supplement: Supplementary file 2 [file ejm-36-623-2024-supplement.zip]

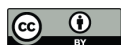

*Supplement of*

**Chemical interdiffusion between Na-series tephritic and phonolitic melts with different H<sub>2</sub>O content, temperature, and oxygen fugacity values**

**Diego González-García et al.**

*Correspondence to:* Diego González-García (digonz15@ucm.es)

- ejm-36-623-2024-supplement-title-page.pdf
- Supp\_file-01-Supplementary figures and tables.pdf
- Supp\_file-02-EPMA data.xlsx
- Supp\_file-03-Diffusion coefficients.xlsx

The copyright of individual parts of the supplement might differ from the article licence.
